# Supplementary material for: Design, Synthesis, and Bioactivity of Novel Coumarin-3-carboxylic Acid Derivatives Containing a Thioether Quinoline Moiety
Source: PubMed Central journal article supplement — ACS Omega. 2024 Dec 11;9(51):50695–704. doi: 10.1021/acsomega.4c08627 (PMC11683614; doi:10.1021/acsomega.4c08627), 2024-12-11
Supplement: ao4c08627_si_001.pdf [file ao4c08627_si_001.pdf]

**Title : Design, Synthesis, and Bioactivity of Novel Coumarin-3-carboxylic Acid  
Derivatives Containing Thioether Quinoline Moiety**

Yuanquan Zhang<sup>a, b1</sup>, Zhiyuan Xu<sup>b1</sup>, Minxiang Dou<sup>b1</sup>, Yan Xu<sup>b</sup>, Xin Fu<sup>b</sup>, Fadi Zhu<sup>b</sup>,  
Huochun Ye<sup>b</sup>, Jing Zhang<sup>b\*</sup>, Gang Feng<sup>b\*</sup>

<sup>a</sup>National Key Laboratory of Green Pesticide, Key Laboratory of Green Pesticide and  
Agricultural Bioengineering, Ministry of Education, Center for R&D of Fine Chemicals  
of Guizhou University, Guiyang, 550025, China

<sup>b</sup> Environment and Plant Protection Institute, Chinese Academy of Tropical  
Agricultural Science, Haikou, 571101, China.

\*0086-898-66969260, Fax: 0086-898-66969211, E-mail: [zh-jing99@163.com](mailto:zh-jing99@163.com) (Jing  
Zhang); Tel.: 0086-898-66969260, Fax: 0086-898-66969211, E-mail:  
[feng8513@sina.com](mailto:feng8513@sina.com) (Gang Feng).

<sup>1</sup> Joint first authors: Yuanquan Zhang, Zhiyuan Xu and Minxiang Dou contributed  
equally to this work.

## Table of Contents

|                                                                                               |     |
|-----------------------------------------------------------------------------------------------|-----|
| Table of Contents.....                                                                        | S1  |
| 1 Spectrogram data of the target compound A1-A39.....                                         | S2  |
| 2 $^1\text{H}$ , $^{13}\text{C}$ , $^{19}\text{F}$ NMR, HRMS spectra of target compounds..... | S27 |

1 Spectrogram data of the target compound A1-A39

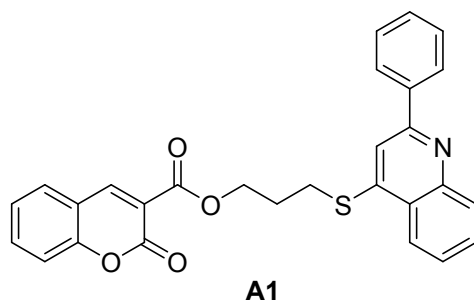

**Figure S1**

**3-((2-phenylquinolin-4-yl)thio)propyl 2-oxo-2H-chromene-3-carboxylate (A1)**

White solid, m.p. 123.2-124.0 °C, yield 52%; <sup>1</sup>H NMR (400 MHz, Chloroform-*d*) δ 8.49 (s, 1H, Ph-H), 8.16 – 8.11 (m, 2H, Ph-H), 8.10 (dd, *J* = 5.2, 3.4 Hz, 2H, Ph-H), 7.74 – 7.70 (m, 2H, Ph-H), 7.70-7.66 (m, *J* = 8.6, 7.4, 1.6 Hz, 1H, Ph-H), 7.56 – 7.51 (m, 2H, Ph-H), 7.46 (dd, *J* = 10.4, 4.7 Hz, 2H, Ph-H), 7.38 – 7.30 (m, 3H, Ph-H), 4.54 (t, *J* = 6.0 Hz, 2H, -COO-CH<sub>2</sub>CH<sub>2</sub>CH<sub>2</sub>-S-), 3.43 (t, *J* = 7.2 Hz, 2H, -COO-CH<sub>2</sub>CH<sub>2</sub>CH<sub>2</sub>-S-), 2.35 – 2.28 (m, 2H, -COO-CH<sub>2</sub>CH<sub>2</sub>CH<sub>2</sub>-S-). <sup>13</sup>C NMR (125 MHz, Chloroform-*d*) δ 163.42 (s), 156.76 (s), 155.30 (s), 149.19 (s), 147.69 (s), 147.22 (s), 139.83 (s), 134.63 (s), 130.35 (s), 130.07 (s), 129.70 (s), 128.88 (s), 127.74 (s), 126.25 (s), 125.69 (s), 124.97 (s), 123.49 (s), 117.93 (d, *J* = 18.0 Hz), 116.89 (s), 114.53 (s), 64.25 (s), 27.78 (s). HRMS (ESI) calcd for C<sub>28</sub>H<sub>22</sub>NO<sub>4</sub>S [M+H]<sup>+</sup>: 468.12641, found 468.12572.

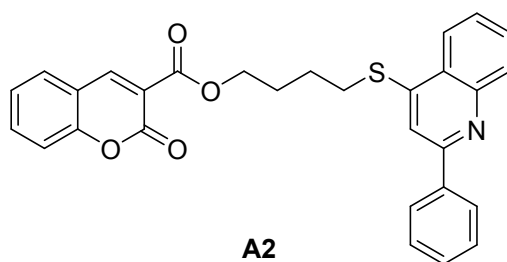

**Figure S2**

**4-((2-phenylquinolin-4-yl)thio)butyl 2-oxo-2H-chromene-3-carboxylate (A2)**

White solid, m.p. 113.6-114.6 °C, yield 13%; <sup>1</sup>H NMR (400 MHz, Chloroform-*d*) δ 8.44 (s, 1H, Ph-H), 8.15 – 8.08 (m, 4H, Ph-H), 7.72-7.68 (m, *J* = 8.4, 6.9, 1.4 Hz, 1H, Ph-H), 7.66 – 7.61 (m, 2H, Ph-H), 7.54 – 7.49 (m, 4H, Ph-H), 7.46 – 7.42 (m, 1H, Ph-H), 7.34 – 7.28 (m, 2H, Ph-H), 4.44 (t, *J* = 5.9 Hz, 2H, -COO-CH<sub>2</sub>CH<sub>2</sub>CH<sub>2</sub>CH<sub>2</sub>-S-), 3.30 (t, *J* = 6.7 Hz, 2H, -COO-CH<sub>2</sub>CH<sub>2</sub>CH<sub>2</sub>CH<sub>2</sub>-S-), 2.06 (dt, *J* = 6.5, 3.3 Hz, 4H, -COO-CH<sub>2</sub>CH<sub>2</sub>CH<sub>2</sub>CH<sub>2</sub>-S-). <sup>13</sup>C NMR (101 MHz, Chloroform-*d*) δ 162.22 (s), 155.56

(d,  $J = 1.4$  Hz), 154.16 (s), 147.79 (s), 146.56 (d,  $J = 3.2$  Hz), 138.77 (s), 133.40 (s), 129.24 (s), 128.89 (s), 128.41 (d,  $J = 17.4$  Hz), 127.82 (s), 126.56 (s), 125.06 (s), 124.58 (s), 123.80 (s), 122.38 (s), 117.02 (s), 116.75 (s), 115.76 (s), 113.32 (s), 64.27 (s), 29.91 (s), 26.75 (s), 23.98 (s). HRMS (ESI) calcd for  $C_{29}H_{24}NO_4S$   $[M+H]^+$ : 482.142055, found 482.14191.

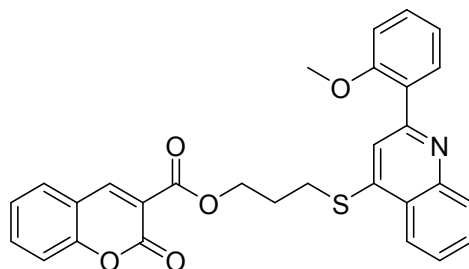

**A3**

**Figure S3**

**3-((2-(2-methoxyphenyl)quinolin-4-yl)thio)propyl 2-oxo-2H-chromene-3-carboxylate (A3)** White solid, m.p. 138.9-139.9 °C, yield 69%;  $^1H$  NMR (400 MHz, Chloroform-*d*)  $\delta$  8.46 (s, 1H, Ph-H), 8.14 – 8.11 (m, 2H, Ph-H), 7.81 (dd,  $J = 7.6, 1.8$  Hz, 1H, Ph-H), 7.76 (s, 1H, Ph-H), 7.72 – 7.68 (m, 1H, Ph-H), 7.66 – 7.62 (m, 1H, Ph-H), 7.54 – 7.50 (m, 2H, Ph-H), 7.35 – 7.28 (m, 3H, Ph-H), 7.08 – 7.04 (m,  $J = 7.5, 0.9$  Hz, 1H, Ph-H), 6.96 (d,  $J = 8.1$  Hz, 1H, Ph-H), 4.53 (t,  $J = 6.0$  Hz, 2H, -COO-CH<sub>2</sub>CH<sub>2</sub>CH<sub>2</sub>-S-), 3.84 (s, 3H, Ph-OCH<sub>3</sub>), 3.34 (t,  $J = 7.1$  Hz, 2H, -COO-CH<sub>2</sub>CH<sub>2</sub>CH<sub>2</sub>-S-), 2.35 – 2.29 (m, 2H, -COO-CH<sub>2</sub>CH<sub>2</sub>CH<sub>2</sub>-S-).  $^{13}C$  NMR (101 MHz, Chloroform-*d*)  $\delta$  162.15 (s), 156.03 (s), 155.50 (s), 154.98 (s), 154.20 (s), 147.91 (s), 146.64 (s), 144.01 (s), 133.46 (s), 130.35 (s), 129.34 (s), 129.14 (s), 128.68 – 128.42 (m), 125.04 (s), 124.49 (s), 123.81 (s), 122.30 (s), 120.24 (s), 117.64 (s), 116.82 (d,  $J = 9.8$  Hz), 115.76 (s), 110.41 (s), 63.08 (s), 54.74 (s), 26.53 (d,  $J = 6.8$  Hz). HRMS (ESI) calcd for  $C_{29}H_{24}NO_5S$   $[M+H]^+$ : 498.13697, found 498.13677.

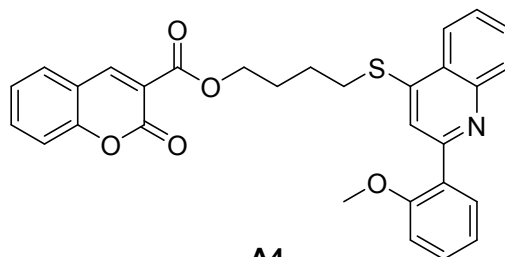

**A4**

**Figure S4**

**4-((2-(2-methoxyphenyl)quinolin-4-yl)thio)butyl 2-oxo-2H-chromene-3-**

**carboxylate (A4)** White solid, m.p. 119.1-120.7 °C, yield 82%; <sup>1</sup>H NMR (400 MHz, Chloroform-*d*) δ 8.42 (s, 1H, Ph-H), 8.14 – 8.09 (m, 2H, Ph-H), 7.81 (dd, *J* = 7.6, 1.8 Hz, 1H, Ph-H), 7.72 – 7.66 (m, 2H, Ph-H), 7.69-7.61 (m, *J* = 8.6, 7.4, 1.6 Hz, 1H, Ph-H), 7.54 – 7.48 (m, 2H, Ph-H), 7.40-7.37 (m, *J* = 8.3, 7.5, 1.8 Hz, 1H, Ph-H), 7.35 – 7.28 (m, 2H, Ph-H), 7.06 (ddd, *J* = 19.9, 13.2, 4.6 Hz, 2H, Ph-H), 4.42 (t, *J* = 5.9 Hz, 2H, -COO-CH<sub>2</sub>CH<sub>2</sub>CH<sub>2</sub>CH<sub>2</sub>-S-), 3.86 (s, 3H, Ph-OCH<sub>3</sub>), 3.22 (t, *J* = 6.7 Hz, 2H, -COO-CH<sub>2</sub>CH<sub>2</sub>CH<sub>2</sub>CH<sub>2</sub>-S-), 2.03 (dd, *J* = 5.9, 2.5 Hz, 4H, -COO-CH<sub>2</sub>CH<sub>2</sub>CH<sub>2</sub>CH<sub>2</sub>-S-). <sup>13</sup>C NMR (101 MHz, Chloroform-*d*) δ 162.13 (s), 156.06 (s), 155.58 (s), 154.93 (s), 154.15 (s), 147.72 (s), 146.59 (s), 144.51 (s), 133.39 (s), 130.38 (s), 129.37 (s), 129.14 (s), 128.52 (t, *J* = 5.2 Hz), 124.96 (s), 124.45 (s), 123.80 (s), 122.30 (s), 120.30 (s), 117.46 (s), 116.97 (s), 116.76 (s), 115.74 (s), 110.54 (s), 64.20 (s), 54.78 (s), 29.66 (s), 26.69 (s), 23.87 (s). HRMS (ESI) calcd for C<sub>30</sub>H<sub>26</sub>NO<sub>5</sub>S [M+H]<sup>+</sup>: 512.152620, found 512.15216.

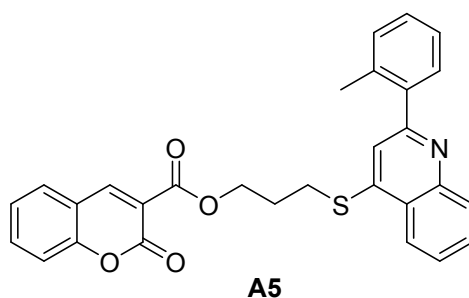

**Figure S5**

**3-((2-(o-tolyl)quinolin-4-yl)thio)propyl 2-oxo-2H-chromene-3-carboxylate (A5)**

White solid, m.p. 91.2-92.3 °C, yield 54%; <sup>1</sup>H NMR (400 MHz, Chloroform-*d*) δ 8.46 (s, 1H, Ph-H), 8.18 – 8.09 (m, 2H, Ph-H), 7.70-7.64 (m, 2H, Ph-H), 7.57 – 7.53 (m, 2H, Ph-H), 7.45 (d, *J* = 7.6 Hz, 1H, Ph-H), 7.39 (s, 1H, Ph-H), 7.37 – 7.31 (m, 2H, Ph-H), 7.23 – 7.14 (m, 3H, Ph-H), 4.51 (t, *J* = 5.9 Hz, 2H, -COO-CH<sub>2</sub>CH<sub>2</sub>CH<sub>2</sub>-S-), 3.36 (t, *J* = 7.1 Hz, 2H, -COO-CH<sub>2</sub>CH<sub>2</sub>CH<sub>2</sub>-S-), 2.38 (s, 3H, Ph-OCH<sub>3</sub>), 2.31 – 2.25 (m, 2H, -COO-CH<sub>2</sub>CH<sub>2</sub>CH<sub>2</sub>-S-). <sup>13</sup>C NMR (101 MHz, Chloroform-*d*) δ 162.25 (s), 158.31 (s), 155.47 (s), 154.25 (s), 147.94 (s), 146.17 (s), 145.61 (s), 139.70 (s), 134.94 (s), 133.46 (s), 129.69 (s), 129.12 (s), 128.89 (s), 128.51 (d, *J* = 7.4 Hz), 127.39 (s), 125.21 (s), 124.87 (s), 124.12 (s), 123.82 (s), 122.32 (s), 116.86 (d, *J* = 8.1

Hz), 116.10 (s), 115.81 (s), 63.02 (s), 26.82 (s), 26.40 (s), 19.30 (s). HRMS (ESI) calcd for C<sub>29</sub>H<sub>24</sub>NO<sub>4</sub>S [M+H]<sup>+</sup>: 482.14206, found 482.14224.

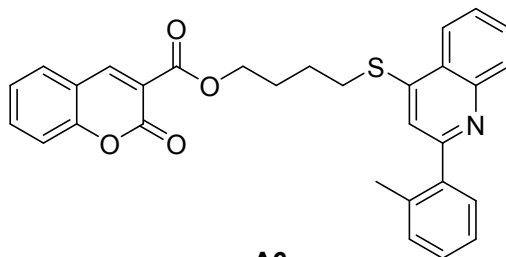

**A6**

**Figure S6**

**4-((2-(o-tolyl)quinolin-4-yl)thio)butyl 2-oxo-2H-chromene-3-carboxylate (A6)**

White solid, m.p. 129.0-130.5 °C, yield 89%; <sup>1</sup>H NMR (400 MHz, Chloroform-*d*) δ 8.46 (s, 1H, Ph-H), 8.12 (ddd, *J* = 25.3, 8.4, 0.8 Hz, 2H, Ph-H), 7.71 (ddd, *J* = 8.4, 6.9, 1.4 Hz, 1H, Ph-H), 7.66 – 7.62 (m, 1H, Ph-H), 7.57 – 7.51 (m, 2H, Ph-H), 7.48 – 7.45 (m, 1H, Ph-H), 7.35 – 7.27 (m, 6H, Ph-H), 4.42 (t, *J* = 5.9 Hz, 2H, -COO-CH<sub>2</sub>CH<sub>2</sub>CH<sub>2</sub>CH<sub>2</sub>-S-), 3.22 (t, *J* = 6.7 Hz, 2H, -COO-CH<sub>2</sub>CH<sub>2</sub>CH<sub>2</sub>CH<sub>2</sub>-S-), 2.39 (s, 3H, Ph-OCH<sub>3</sub>), 2.03 (dd, *J* = 6.4, 2.9 Hz, 4H, -COO-CH<sub>2</sub>CH<sub>2</sub>CH<sub>2</sub>CH<sub>2</sub>-S-). <sup>13</sup>C NMR (101 MHz, Chloroform-*d*) δ 162.22 (s), 158.25 (s), 155.53 (s), 154.18 (s), 147.80 (s), 146.11 (s), 139.78 (s), 134.91 (s), 133.41 (s), 129.81 (s), 129.10 (s), 128.85 (s), 128.47 (d, *J* = 3.1 Hz), 127.52 (s), 125.07 (d, *J* = 15.5 Hz), 124.07 (s), 123.81 (s), 122.32 (s), 117.02 (s), 116.78 (s), 116.09 (s), 115.78 (s), 64.25 (s), 29.74 (s), 26.72 (s), 23.95 (s), 19.31 (s). HRMS (ESI) calcd for C<sub>30</sub>H<sub>26</sub>NO<sub>4</sub>S[M+H]<sup>+</sup>: 496.15771, found 496.15711.

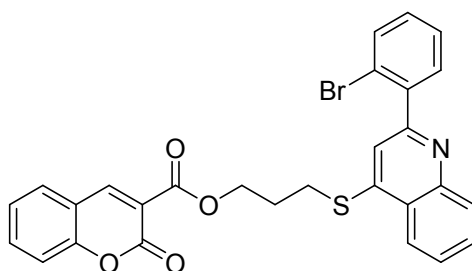

**A7**

**Figure S7**

**3-((2-(2-bromophenyl)quinolin-4-yl)thio)propyl 2-oxo-2H-chromene-3-**

**carboxylate (A7)** White solid, m.p. 110.2-111.9 °C, yield 68%; <sup>1</sup>H NMR (400 MHz, Chloroform-*d*) δ 8.49 (s, 1H, Ph-H), 8.16 (dd, *J* = 8.4, 0.9 Hz, 1H, Ph-H), 8.11 (dd, *J* =

8.4, 0.6 Hz, 1H, Ph-H), 7.73 (ddd,  $J = 8.4, 6.9, 1.4$  Hz, 1H, Ph-H), 7.68 – 7.62 (m, 2H,

Ph-H), 7.59 – 7.54 (m, 4H, Ph-H), 7.41–7.37 (m,  $J = 7.5, 1.2$  Hz, 1H, Ph-H), 7.36 – 7.31 (m, 2H, Ph-H), 7.17 – 7.13 (m, 1H, Ph-H), 4.53 (t,  $J = 5.9$  Hz, 2H, -COO-CH<sub>2</sub>CH<sub>2</sub>CH<sub>2</sub>-S-), 3.38 (t,  $J = 7.2$  Hz, 2H, -COO-CH<sub>2</sub>CH<sub>2</sub>CH<sub>2</sub>-S-), 2.35 – 2.28 (m, 2H, -COO-CH<sub>2</sub>CH<sub>2</sub>CH<sub>2</sub>-S-). <sup>13</sup>C NMR (101 MHz, Chloroform-*d*) δ 163.21 (s), 157.70 (s), 156.52 (s), 155.25 (s), 149.02 (s), 147.24 (s), 146.27 (s), 141.60 (s), 134.53 (s), 133.09 (s), 131.63 (s), 130.23 (s), 130.00 (d,  $J = 4.0$  Hz), 129.63 (s), 127.75 (s), 126.62 (s), 125.55 (s), 124.89 (s), 123.44 (s), 121.76 (s), 117.88 (d,  $J = 9.0$  Hz), 117.55 (s), 116.84 (s), 64.08 (s), 27.92 (s), 27.43 (s). HRMS (ESI) calcd for C<sub>30</sub>H<sub>26</sub>NO<sub>4</sub>S[M+H]<sup>+</sup>: 546.03692, found 546.03575.

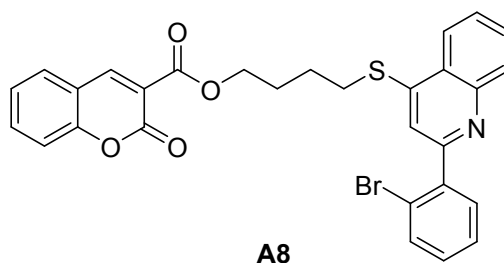

**Figure S8**

**4-((2-(2-bromophenyl)quinolin-4-yl)thio)butyl 2-oxo-2H-chromene-3-carboxylate (A8)** White solid, m.p. 108.6-109.4 °C, yield 21%; <sup>1</sup>H NMR (400 MHz, Chloroform-*d*) δ 8.46 (s, 1H, Ph-H), 8.16 (dd,  $J = 8.4, 0.8$  Hz, 1H, Ph-H), 8.10 (dd,  $J = 8.4, 0.5$  Hz, 1H, Ph-H), 7.72 (ddd,  $J = 8.4, 6.9, 1.4$  Hz, 1H, Ph-H), 7.67 – 7.62 (m, 3H, Ph-H), 7.59 – 7.55 (m, 1H, Ph-H), 7.52 (dd,  $J = 7.8, 1.5$  Hz, 1H, Ph-H), 7.48 (s, 1H, Ph-H), 7.42 (td,  $J = 7.5, 1.1$  Hz, 1H, Ph-H), 7.34 (d,  $J = 8.3$  Hz, 1H, Ph-H), 7.29 (ddd,  $J = 13.7, 7.1, 4.2$  Hz, 3H, Ph-H), 7.26 (s, 1H, Ph-H), 4.42 (t,  $J = 5.8$  Hz, 2H, -COO-CH<sub>2</sub>CH<sub>2</sub>CH<sub>2</sub>CH<sub>2</sub>-S-), 3.24 (t,  $J = 6.7$  Hz, 2H, -COO-CH<sub>2</sub>CH<sub>2</sub>CH<sub>2</sub>CH<sub>2</sub>-S-), 2.03 (dd,  $J = 6.4, 2.9$  Hz, 4H, -COO-CH<sub>2</sub>CH<sub>2</sub>CH<sub>2</sub>CH<sub>2</sub>-S-). <sup>13</sup>C NMR (101 MHz, Chloroform-*d*) δ 162.14 (s), 156.57 (s), 155.59 (s), 154.13 (s), 147.85 (s), 146.12 (s), 145.71 (s), 140.55 (s), 133.43 (s), 132.20 (s), 130.56 (s), 129.32 – 128.79 (m), 128.51 (s), 126.76 (s), 125.51 (s), 124.42 (s), 123.83 (s), 122.39 (s), 120.71 (s), 116.82 (d,  $J = 16.2$  Hz), 116.42 (s), 115.76 (s), 64.29 (s), 29.62 (s), 26.71 (s), 24.12 (s). HRMS (ESI) calcd for C<sub>29</sub>H<sub>23</sub>BrNO<sub>4</sub>S [M+H]<sup>+</sup>: 560.05257, found 560.05251.



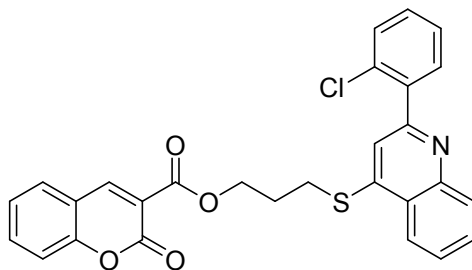

**A9**

**Figure S9**

**3-((2-(2-chlorophenyl)quinolin-4-yl)thio)propyl 2-oxo-2H-chromene-3-**

**carboxylate (A9)** White solid, m.p. 116.9-118.0 °C, yield 26%; <sup>1</sup>H NMR (400 MHz, Chloroform-*d*) δ 8.50 (s, 1H, Ph-H), 8.16 (dd, *J* = 8.4, 0.8 Hz, 1H, Ph-H), 8.12 (dd, *J* = 8.4, 0.5 Hz, 1H, Ph-H), 7.73 (ddd, *J* = 8.4, 6.9, 1.3 Hz, 1H, Ph-H), 7.70 – 7.64 (m, 2H, Ph-H), 7.60 – 7.55 (m, 3H, Ph-H), 7.37–7.32 (m, *J* = 8.6, 4.2 Hz, 4H, Ph-H), 7.26 – 7.18 (m, 1H, Ph-H), 4.53 (t, *J* = 5.9 Hz, 2H, -COO-CH<sub>2</sub>CH<sub>2</sub>CH<sub>2</sub>-S-), 3.38 (t, *J* = 7.2 Hz, 2H, -COO-CH<sub>2</sub>CH<sub>2</sub>-S-), 2.34 – 2.27 (m, 2H, -COO-CH<sub>2</sub>CH<sub>2</sub>-S-). <sup>13</sup>C NMR (125 MHz, Chloroform-*d*) δ 163.26 (s), 156.62 (s), 156.43 (s), 155.30 (s), 149.10 (s), 147.41 (s), 146.37 (s), 139.63 (s), 134.61 (s), 132.25 (s), 131.79 (s), 130.29 (s), 130.17 – 129.77 (m), 129.70 (s), 127.31 (s), 126.69 (s), 125.60 (s), 124.97 (s), 123.50 (s), 117.92 (d, *J* = 9.8 Hz), 117.62 (s), 116.90 (s), 64.16 (s), 27.85 (s), 27.48 (s). HRMS (ESI) calcd for C<sub>28</sub>H<sub>21</sub>ClNO<sub>4</sub>S [M+H]<sup>+</sup>: 502.08743, found 502.08725.

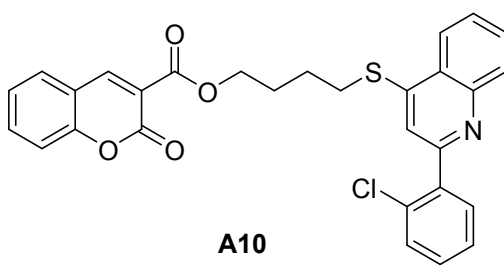

**A10**

**Figure S10**

**4-((2-(2-chlorophenyl)quinolin-4-yl)thio)butyl 2-oxo-2H-chromene-3-carboxylate**

**(A10)** White solid, m.p. 122.3-124.0 °C, yield 35%; <sup>1</sup>H NMR (400 MHz, Chloroform-*d*) δ 8.46 (s, 1H, Ph-H), 8.15 (dd, *J* = 8.4, 0.9 Hz, 1H, Ph-H), 8.10 (dd, *J* = 8.4, 0.6 Hz, 1H, Ph-H), 7.75 – 7.67 (m, 2H, Ph-H), 7.64 (ddd, *J* = 8.6, 7.4, 1.6 Hz, 1H, Ph-H), 7.57 (ddd, *J* = 8.2, 6.9, 1.2 Hz, 1H, Ph-H), 7.54 – 7.50 (m, 2H, Ph-H), 7.49 – 7.44 (m, 1H, Ph-H), 7.41 – 7.29 (m, 4H, Ph-H), 4.42 (t, *J* = 5.7 Hz, 2H, -COO-CH<sub>2</sub>CH<sub>2</sub>CH<sub>2</sub>CH<sub>2</sub>-S-),

3.24 (t,  $J = 6.6$  Hz, 2H, -COO-CH<sub>2</sub>CH<sub>2</sub>CH<sub>2</sub>CH<sub>2</sub>-S-), 2.08 – 1.99 (m, 4H, -COO-CH<sub>2</sub>CH<sub>2</sub>CH<sub>2</sub>CH<sub>2</sub>-S-). <sup>13</sup>C NMR (125 MHz, Chloroform-*d*) (126 MHz, )  $\delta$  163.24 (s), 156.71 (s), 156.36 (s), 155.24 (s), 148.93 (s), 147.36 (s), 146.87 (s), 139.64 (s), 134.54 (s), 132.26 (s), 131.76 (s), 130.62 – 129.78 (m), 129.62 (s), 127.34 (s), 126.62 (s), 125.55 (s), 124.94 (s), 123.50 (s), 117.94 (d,  $J = 20.7$  Hz), 117.60 (s), 116.86 (s), 65.40 (s), 30.76 (s), 27.83 (s), 25.17 (s). HRMS (ESI) calcd for C<sub>29</sub>H<sub>23</sub>ClNO<sub>4</sub>S [M+H]<sup>+</sup>: 516.10308, found 516.10234.

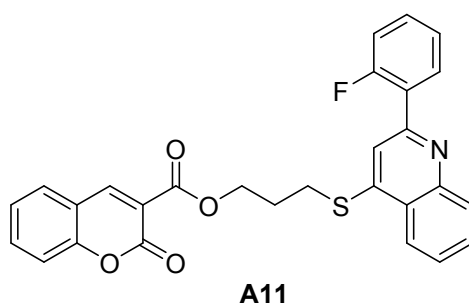

**Figure S11**

**3-((2-(2-fluorophenyl)quinolin-4-yl)thio)propyl 2-oxo-2H-chromene-3-carboxylate (A11)** White solid, m.p. 117.8-118.5 °C, yield 24%; <sup>1</sup>H NMR (400 MHz, Chloroform-*d*)  $\delta$  8.51 (s, 1H, Ph-H), 8.13 (td,  $J = 8.5, 0.7$  Hz, 2H, Ph-H), 8.05 (td,  $J = 7.8, 1.9$  Hz, 1H, Ph-H), 7.75 – 7.70 (m, 2H, Ph-H), 7.65 (ddd,  $J = 8.7, 7.4, 1.6$  Hz, 1H, Ph-H), 7.58 – 7.53 (m, 2H, Ph-H), 7.36 – 7.30 (m, 3H, Ph-H), 7.29–7.25 (m,  $J = 7.5, 1.3$  Hz, 1H, Ph-H), 7.08 (ddd,  $J = 11.2, 8.1, 1.2$  Hz, 1H, Ph-H), 4.54 (t,  $J = 6.0$  Hz, 2H, -COO-CH<sub>2</sub>CH<sub>2</sub>CH<sub>2</sub>-S-), 3.39 (t,  $J = 7.1$  Hz, 2H, -COO-CH<sub>2</sub>CH<sub>2</sub>CH<sub>2</sub>-S-), 2.35 – 2.28 (m, 2H, -COO-CH<sub>2</sub>CH<sub>2</sub>CH<sub>2</sub>-S-). <sup>13</sup>C NMR (101 MHz, Chloroform-*d*)  $\delta$  162.13 (s), 159.53 (d,  $J = 249.2$  Hz), 155.56 (s), 154.18 (s), 152.01 (d,  $J = 1.9$  Hz), 147.94 (s), 146.54 (s), 145.58 (s), 133.48 (s), 130.47 (d,  $J = 3.0$  Hz), 129.79 (d,  $J = 8.5$  Hz), 129.21 (s), 128.92 (s), 128.56 (s), 126.83 (d,  $J = 11.9$  Hz), 125.44 (s), 124.55 (s), 123.84 (s), 123.72 (d,  $J = 3.5$  Hz), 122.34 (s), 116.83 (d,  $J = 14.5$  Hz), 116.23 (d,  $J = 8.2$  Hz), 115.78 (s), 115.08 (d,  $J = 22.8$  Hz), 63.10 (s), 26.48 (d,  $J = 2.4$  Hz). <sup>19</sup>F NMR (377 MHz, Chloroform-*d*)  $\delta$  -117.11 (s). HRMS (ESI) calcd for C<sub>28</sub>H<sub>21</sub>FNO<sub>4</sub>S [M+H]<sup>+</sup>: 486.11698, found 486.11649.

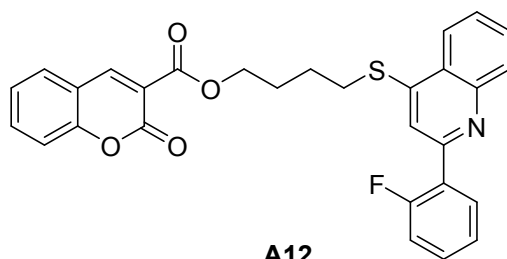

**A12**

**Figure S12**

**4-((2-(2-fluorophenyl)quinolin-4-yl)thio)butyl 2-oxo-2H-chromene-3-carboxylate**

**(A12)** White solid, m.p. 110.8-112.1 °C, yield 34%; <sup>1</sup>H NMR (400 MHz, Chloroform-*d*) δ 8.46 (s, 1H, Ph-H), 8.15 – 8.09 (m, 2H, Ph-H), 8.07–8.03 (m,  $J = 7.8, 1.8$  Hz, 1H, Ph-H), 7.72 (ddd,  $J = 8.3, 6.9, 1.3$  Hz, 1H, Ph-H), 7.63 (ddd,  $J = 9.8, 6.6, 1.9$  Hz, 2H, Ph-H), 7.55 (ddd,  $J = 8.2, 7.0, 1.2$  Hz, 1H, Ph-H), 7.50 (dd,  $J = 7.8, 1.4$  Hz, 1H, Ph-H), 7.41 (tdd,  $J = 7.1, 5.0, 1.8$  Hz, 1H, Ph-H), 7.34 – 7.27 (m, 3H, Ph-H), 7.16 (ddd,  $J = 11.3, 8.2, 0.9$  Hz, 1H, Ph-H), 4.43 (t,  $J = 5.7$  Hz, 2H, -COO-CH<sub>2</sub>CH<sub>2</sub>CH<sub>2</sub>CH<sub>2</sub>-S-), 3.25 (t,  $J = 6.6$  Hz, 2H, -COO-CH<sub>2</sub>CH<sub>2</sub>CH<sub>2</sub>CH<sub>2</sub>-S-), 2.04 (dt,  $J = 6.1, 3.2$  Hz, 4H, -COO-CH<sub>2</sub>CH<sub>2</sub>CH<sub>2</sub>CH<sub>2</sub>-S-). <sup>13</sup>C NMR (101 MHz, Chloroform-*d*) δ 162.07 (s), 159.57 (d,  $J = 249.1$  Hz), 155.61 (s), 154.11 (s), 151.93 (d,  $J = 1.9$  Hz), 147.77 (s), 146.48 (s), 146.09 (s), 133.40 (s), 130.44 (d,  $J = 3.0$  Hz), 129.85 (d,  $J = 8.5$  Hz), 129.18 (s), 128.87 (s), 128.49 (s), 126.82 (d,  $J = 11.9$  Hz), 125.36 (s), 124.49 (s), 123.79 (s), 123.74 (d,  $J = 3.4$  Hz), 122.33 (s), 116.81 (d,  $J = 18.0$  Hz), 116.07 (d,  $J = 8.5$  Hz), 115.74 (s), 115.20 (d,  $J = 22.8$  Hz), 64.27 (s), 29.59 (s), 26.74 (s), 23.89 (s). <sup>19</sup>F NMR (471 MHz, Chloroform-*d*) δ -117.00 (s). HRMS (ESI) calcd for C<sub>29</sub>H<sub>23</sub>FNO<sub>4</sub>S [M+H]<sup>+</sup>: 500.13263, found 500.13254.

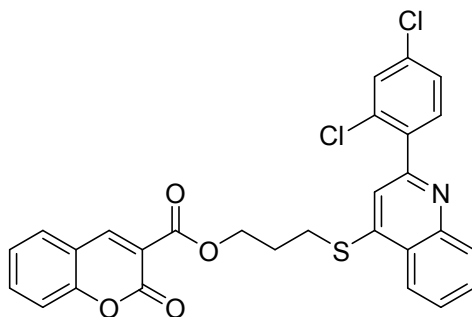

**A13**

**Figure S13**

**3-((2-(2,4-dichlorophenyl)quinolin-4-yl)thio)propyl 2-oxo-2H-chromene-3-**

**carboxylate (A13)** White solid, m.p. 120.4-122.4 °C, yield 43%; <sup>1</sup>H NMR (400 MHz, Chloroform-*d*) δ 8.51 (s, 1H, Ph-H), 8.16 (dd, *J* = 8.4, 0.8 Hz, 1H, Ph-H), 8.10 (dd, *J* = 8.4, 0.5 Hz, 1H, Ph-H), 7.74 (ddd, *J* = 8.4, 6.9, 1.3 Hz, 1H, Ph-H), 7.69 – 7.64 (m, 2H, Ph-H), 7.60 – 7.56 (m, 3H, Ph-H), 7.38 – 7.32 (m, 4H, Ph-H), 4.52 (t, *J* = 5.9 Hz, 2H, -COO-CH<sub>2</sub>CH<sub>2</sub>CH<sub>2</sub>-S-), 3.39 (t, *J* = 7.2 Hz, 2H, -COO-CH<sub>2</sub>CH<sub>2</sub>CH<sub>2</sub>-S-), 2.33 – 2.26 (m, 2H, -COO-CH<sub>2</sub>CH<sub>2</sub>CH<sub>2</sub>-S-). <sup>13</sup>C NMR (101 MHz, Chloroform-*d*) δ 163.32 (s), 156.52 (s), 155.28 (d, *J* = 6.9 Hz), 149.12 (s), 147.33 (s), 146.65 (s), 138.13 (s), 135.16 (s), 134.64 (s), 132.99 (s), 132.67 (s), 130.16 (d, *J* = 7.5 Hz), 129.65 (d, *J* = 6.3 Hz), 127.57 (s), 126.77 (s), 125.57 (s), 124.95 (s), 123.45 (s), 117.83 (d, *J* = 12.4 Hz), 117.24 (s), 116.91 (s), 64.06 (s), 27.91 (s), 27.38 (s). HRMS (ESI) calcd for C<sub>28</sub>H<sub>20</sub>Cl<sub>2</sub>NO<sub>4</sub>S [M+H]<sup>+</sup>: 536.04846, found 536.04828.

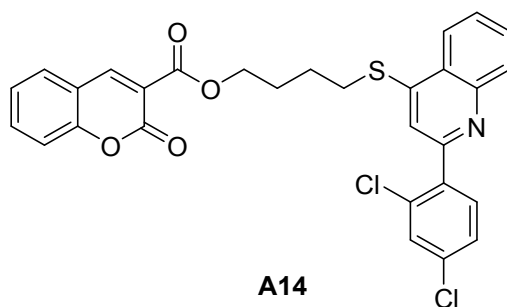

**Figure S14**

**4-((2-(2,4-dichlorophenyl)quinolin-4-yl)thio)butyl 2-oxo-2H-chromene-3-carboxylate (A14)** White solid, m.p. 132.9-134.8 °C, yield 17%; <sup>1</sup>H NMR (400 MHz, Chloroform-*d*) δ 8.48 (s, 1H, Ph-H), 8.15 (dd, *J* = 8.3, 0.8 Hz, 1H, Ph-H), 8.08 (d, *J* = 8.0 Hz, 1H, Ph-H), 7.72 (ddd, *J* = 8.3, 7.0, 1.3 Hz, 1H, Ph-H), 7.68 – 7.62 (m, 2H, Ph-H), 7.59 – 7.53 (m, 2H, Ph-H), 7.51 – 7.46 (m, 2H, Ph-H), 7.37 – 7.29 (m, 3H, Ph-H), 4.42 (t, *J* = 5.7 Hz, 2H, -COO-CH<sub>2</sub>CH<sub>2</sub>CH<sub>2</sub>CH<sub>2</sub>-S-), 3.24 (t, *J* = 6.7 Hz, 2H, -COO-CH<sub>2</sub>CH<sub>2</sub>CH<sub>2</sub>CH<sub>2</sub>-S-), 2.09 – 1.97 (m, 4H, -COO-CH<sub>2</sub>CH<sub>2</sub>CH<sub>2</sub>CH<sub>2</sub>-S-). <sup>13</sup>C NMR (101 MHz, Chloroform-*d*) δ 162.22 (s), 155.56 (s), 154.13 (d, *J* = 1.4 Hz), 147.93 (s), 146.16 (d, *J* = 9.7 Hz), 137.07 (s), 134.16 (s), 133.48 (s), 131.89 (s), 131.58 (s), 129.07 (d, *J* = 6.7 Hz), 128.80 (s), 128.51 (s), 126.58 (s), 125.66 (s), 124.43 (s), 123.84 (s), 122.39 (s), 116.80 (d, *J* = 14.7 Hz), 116.13 (s), 115.76 (s), 64.33 (s), 29.61 (s), 26.69 (s), 24.09 (s). HRMS (ESI) calcd for C<sub>29</sub>H<sub>22</sub>Cl<sub>2</sub>NO<sub>4</sub>S [M+H]<sup>+</sup>: 550.06411, found 550.06379.

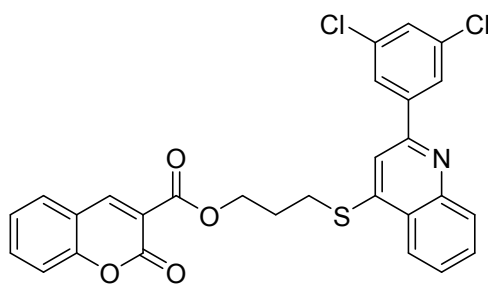

**A15**

**Figure S15**

**3-((2-(3,5-dichlorophenyl)quinolin-4-yl)thio)propyl 2-oxo-2H-chromene-3-carboxylate (A15)** White solid, m.p. 173.5-174.3 °C, yield 22%; <sup>1</sup>H NMR (400 MHz, Chloroform-*d*) δ 8.51 (s, 1H, Ph-H), 8.13 (ddd, *J* = 17.8, 8.4, 0.7 Hz, 2H, Ph-H), 8.00 (d, *J* = 1.9 Hz, 2H, Ph-H), 7.76 – 7.71 (m, 2H, Ph-H), 7.69 – 7.64 (m, 1H, Ph-H), 7.58 – 7.53 (m, 2H, Ph-H), 7.33 (dd, *J* = 11.2, 4.4 Hz, 2H, Ph-H), 7.25 (d, *J* = 1.9 Hz, 1H, Ph-H), 4.53 (t, *J* = 5.9 Hz, 2H, -COO-CH<sub>2</sub>CH<sub>2</sub>CH<sub>2</sub>-S-), 3.49 (t, *J* = 7.3 Hz, 2H, -COO-CH<sub>2</sub>CH<sub>2</sub>CH<sub>2</sub>-S-), 2.33 (dt, *J* = 12.7, 6.4 Hz, 2H, -COO-CH<sub>2</sub>CH<sub>2</sub>CH<sub>2</sub>-S-). <sup>13</sup>C NMR (101 MHz, Chloroform-*d*) δ 162.54 (s), 155.68 (s), 154.20 (s), 152.75 (s), 148.24 (s), 147.14 (s), 146.31 (s), 141.66 (s), 134.25 (s), 133.55 (s), 129.29 (s), 128.54 (s), 127.92 (s), 125.72 (s), 125.13 (s), 124.84 (s), 123.87 (s), 122.41 (s), 116.82 (d, *J* = 18.2 Hz), 115.79 (s), 112.68 (s), 63.15 (s), 26.74 (s), 26.49 (s). HRMS (ESI) calcd for C<sub>28</sub>H<sub>20</sub>Cl<sub>2</sub>NO<sub>4</sub>S [M+H]<sup>+</sup>: 536.048461, found 536.04857.

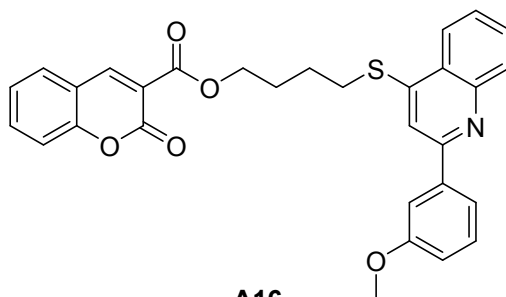

**A16**

**Figure S16**

**4-((2-(3-methoxyphenyl)quinolin-4-yl)thio)butyl 2-oxo-2H-chromene-3-carboxylate (A16)** White solid, m.p. 86.0-87.8 °C, yield 10%; <sup>1</sup>H NMR (400 MHz, Chloroform-*d*) δ 8.43 (s, 1H, Ph-H), 8.15 – 8.09 (m, 2H, Ph-H), 7.70 (ddd, *J* = 5.9, 5.4, 1.4 Hz, 2H, Ph-H), 7.65–7.61 (m, *J* = 5.5, 1.6 Hz, 3H, Ph-H), 7.54 – 7.48 (m, 2H, Ph-H), 7.41 (t, *J* = 7.9 Hz, 1H, Ph-H), 7.34 – 7.28 (m, 2H, Ph-H), 6.99 (dd, *J* = 8.0, 2.3 Hz, 1H, Ph-H), 4.44 (t, *J* = 5.7 Hz, 2H, -COO-CH<sub>2</sub>CH<sub>2</sub>CH<sub>2</sub>CH<sub>2</sub>-S-), 3.91 (s, 3H,

Ph-OCH<sub>3</sub>), 3.29 (t, *J* = 6.6 Hz, 2H, -COO-CH<sub>2</sub>CH<sub>2</sub>CH<sub>2</sub>CH<sub>2</sub>-S-), 2.05 (dt, *J* = 6.3, 3.3 Hz, 4H, -COO-CH<sub>2</sub>CH<sub>2</sub>CH<sub>2</sub>CH<sub>2</sub>-S-). <sup>13</sup>C NMR (101 MHz, Chloroform-*d*) δ 162.18 (s), 159.04 (s), 155.56 (s), 155.31 (s), 154.15 (s), 147.75 (s), 146.52 (d, *J* = 10.8 Hz), 140.25 (s), 133.37 (s), 129.25 (s), 128.85 (d, *J* = 9.7 Hz), 128.50 (s), 125.11 (s), 124.66 (s), 123.78 (s), 122.38 (s), 118.94 (s), 117.00 (s), 116.75 (s), 115.74 (s), 114.19 (s), 113.38 (s), 111.88 (s), 64.24 (s), 54.40 (s), 29.90 (s), 26.76 (s), 23.97 (s). HRMS (ESI) calcd for C<sub>30</sub>H<sub>26</sub>NO<sub>5</sub>S [M+H]<sup>+</sup>: 512.15262, found 512.15207.

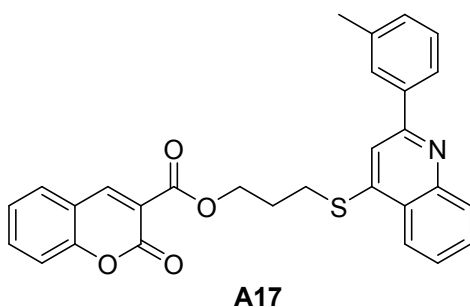

**Figure S17**

**3-((2-(m-tolyl)quinolin-4-yl)thio)propyl 2-oxo-2H-chromene-3-carboxylate (A17)**

White solid, m.p. 98.0-100.0 °C, yield 54%; <sup>1</sup>H NMR (400 MHz, Chloroform-*d*) δ 8.48 (s, 1H, Ph-H), 8.14 (dd, *J* = 12.2, 4.6 Hz, 2H, Ph-H), 7.93 (s, 1H, Ph-H), 7.84 (d, *J* = 7.7 Hz, 1H, Ph-H), 7.74 – 7.69 (m, 2H, Ph-H), 7.65 (ddd, *J* = 8.6, 7.4, 1.6 Hz, 1H, Ph-H), 7.55 – 7.50 (m, 2H, Ph-H), 7.32 (ddd, *J* = 10.4, 5.3, 2.9 Hz, 3H, Ph-H), 7.17 (d, *J* = 7.5 Hz, 1H, Ph-H), 4.53 (t, *J* = 6.0 Hz, 2H, -COO-CH<sub>2</sub>CH<sub>2</sub>CH<sub>2</sub>-S-), 3.43 (t, *J* = 7.1 Hz, 2H, -COO-CH<sub>2</sub>CH<sub>2</sub>CH<sub>2</sub>-S-), 2.43 (s, 3H, Ph-OCH<sub>3</sub>), 2.35 – 2.28 (m, 2H, -COO-CH<sub>2</sub>CH<sub>2</sub>CH<sub>2</sub>-S-). <sup>13</sup>C NMR (101 MHz, Chloroform-*d*) δ 162.29 (s), 155.88 (s), 155.59 (s), 154.19 (s), 148.05 (s), 146.56 (s), 145.99 (s), 138.69 (s), 137.47 (s), 133.49 (s), 129.37 – 128.82 (m), 128.56 (s), 127.62 (s), 127.28 (s), 125.06 (s), 124.58 (s), 123.78 (d, *J* = 10.2 Hz), 122.38 (s), 116.81 (d, *J* = 13.1 Hz), 115.75 (s), 113.66 (s), 63.09 (s), 26.67 (d, *J* = 4.0 Hz), 20.53 (s). HRMS (ESI) calcd for C<sub>29</sub>H<sub>24</sub>NO<sub>4</sub>S [M+H]<sup>+</sup>: 482.14206, found 482.14151.

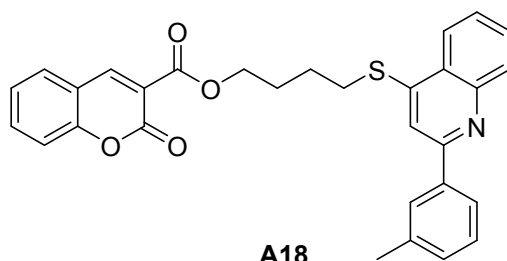

**A18**

**Figure S18**

**4-((2-(m-tolyl)quinolin-4-yl)thio)butyl 2-oxo-2H-chromene-3-carboxylate (A18)**

White solid, m.p. 89.8-90.9 °C, yield 71%; <sup>1</sup>H NMR (400 MHz, Chloroform-*d*) δ 8.43 (s, 1H, Ph-H), 8.15 – 8.09 (m, 2H, Ph-H), 7.93 (s, 1H, Ph-H), 7.84 (d, *J* = 7.7 Hz, 1H, Ph-H), 7.70 (ddd, *J* = 8.3, 6.9, 1.4 Hz, 1H, Ph-H), 7.65 – 7.60 (m, 2H, Ph-H), 7.53 – 7.47 (m, 2H, Ph-H), 7.41–7.37 (m, *J* = 7.6 Hz, 1H, Ph-H), 7.33 – 7.24 (m, 3H, Ph-H), 7.26 (s, 1H, Ph-H), 4.44 (t, *J* = 5.8 Hz, 2H, -COO-CH<sub>2</sub>CH<sub>2</sub>CH<sub>2</sub>CH<sub>2</sub>-S-), 3.29 (t, *J* = 6.7 Hz, 2H, -COO-CH<sub>2</sub>CH<sub>2</sub>CH<sub>2</sub>CH<sub>2</sub>-S-), 2.46 (s, 3H, Ph-OCH<sub>3</sub>), 2.05 (dt, *J* = 6.3, 3.2 Hz, 4H, -COO-CH<sub>2</sub>CH<sub>2</sub>CH<sub>2</sub>CH<sub>2</sub>-S-). <sup>13</sup>C NMR (101 MHz, Chloroform-*d*) δ 163.21 (s), 156.69 (d, *J* = 18.2 Hz), 155.18 (s), 148.79 (s), 147.54 (d, *J* = 7.9 Hz), 139.76 (s), 138.57 (s), 134.41 (s), 130.20 (d, *J* = 7.4 Hz), 129.89 (s), 129.53 (s), 128.74 (s), 128.26 (s), 126.04 (s), 125.61 (s), 124.75 (d, *J* = 13.1 Hz), 123.42 (s), 118.03 (s), 117.78 (s), 116.77 (s), 114.50 (s), 65.28 (s), 30.95 (s), 27.78 (s), 24.99 (s), 21.61 (s). HRMS (ESI) calcd for C<sub>30</sub>H<sub>26</sub>NO<sub>4</sub>S [M+H]<sup>+</sup>: 496.15771, found 496.15757.

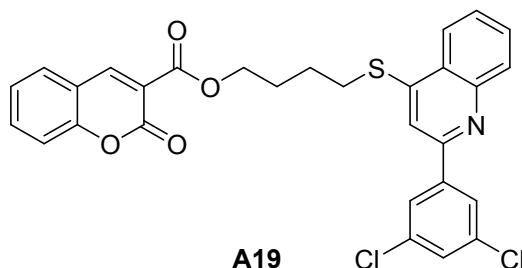

**A19**

**Figure S19**

**4-((2-(3,5-dichlorophenyl)quinolin-4-yl)thio)butyl 2-oxo-2H-chromene-3-**

**carboxylate (A19)** White solid, m.p. 130.8-132.8 °C, yield 10%; <sup>1</sup>H NMR (400 MHz, Chloroform-*d*) δ 8.47 (s, 1H, Ph-H), 8.14 – 8.06 (m, 2H, Ph-H), 8.00 (d, *J* = 1.9 Hz, 1H, Ph-H), 7.72 (ddd, *J* = 8.3, 6.9, 1.3 Hz, 1H, Ph-H), 7.64 (td, *J* = 3.4, 1.7 Hz, 1H, Ph-H), 7.56 – 7.49 (m, 3H, Ph-H), 7.41 – 7.28 (m, 4H, Ph-H), 4.45 (t, *J* = 5.6 Hz, 2H, -COO-CH<sub>2</sub>CH<sub>2</sub>CH<sub>2</sub>CH<sub>2</sub>-S-), 3.32 (t, *J* = 6.6 Hz, 2H, -COO-CH<sub>2</sub>CH<sub>2</sub>CH<sub>2</sub>CH<sub>2</sub>-S-),

2.09 – 2.03 (m, 4H, -COO-CH<sub>2</sub>CH<sub>2</sub>CH<sub>2</sub>CH<sub>2</sub>-S-). <sup>13</sup>C NMR (101 MHz, Chloroform-*d*) δ 163.36 (s), 156.65 (s), 155.18 (s), 153.57 (s), 149.01 (s), 148.72 (s), 147.26 (s), 142.65 (s), 135.44 (s), 134.52 (s), 130.33 (s), 129.53 (s), 129.10 (s), 126.75 (s), 126.06 (s), 125.83 (s), 124.88 (s), 123.46 (s), 117.95 (s), 117.75 (s), 116.82 (s), 113.54 (s), 65.39 (s), 30.97 (s), 27.74 (s), 24.97 (s). HRMS (ESI) calcd for C<sub>29</sub>H<sub>22</sub>Cl<sub>2</sub>NO<sub>4</sub>S [M+H]<sup>+</sup>: 550.06411, found 550.06440.

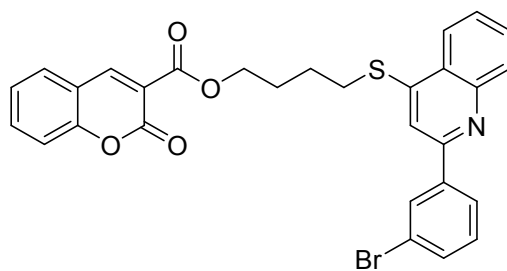

**A20**

**Figure S20**

**4-((2-(3-bromophenyl)quinolin-4-yl)thio)butyl 2-oxo-2H-chromene-3-carboxylate (A20)** White solid, m.p. 132.0-133.8 °C, yield 30%; <sup>1</sup>H NMR (400 MHz, Chloroform-*d*) δ 8.45 (s, 1H, Ph-H), 8.28 (t, *J* = 1.8 Hz, 1H, Ph-H), 8.11 (ddd, *J* = 15.8, 8.4, 0.7 Hz, 2H, Ph-H), 8.02 – 7.98 (m, 1H, Ph-H), 7.72 (ddd, *J* = 8.4, 6.9, 1.4 Hz, 1H, Ph-H), 7.63 (ddd, *J* = 8.7, 7.3, 1.6 Hz, 1H, Ph-H), 7.59 (s, 1H, Ph-H), 7.57 – 7.48 (m, 3H, Ph-H), 7.37 (t, *J* = 7.9 Hz, 1H, Ph-H), 7.33 – 7.28 (m, 2H, Ph-H), 4.44 (t, *J* = 5.8 Hz, 2H, -COO-CH<sub>2</sub>CH<sub>2</sub>CH<sub>2</sub>CH<sub>2</sub>-S-), 3.30 (t, *J* = 6.7 Hz, 2H, -COO-CH<sub>2</sub>CH<sub>2</sub>CH<sub>2</sub>CH<sub>2</sub>-S-), 2.06 (dt, *J* = 6.1, 3.1 Hz, 4H, -COO-CH<sub>2</sub>CH<sub>2</sub>CH<sub>2</sub>CH<sub>2</sub>-S-). <sup>13</sup>C NMR (101 MHz, Chloroform-*d*) δ 162.23 (s), 155.59 (s), 154.11 (s), 153.82 (s), 147.90 (s), 147.14 (s), 146.33 (s), 140.73 (s), 133.45 (s), 131.20 (s), 129.58 (s), 129.43 – 129.00 (m), 128.48 (s), 125.39 (s), 125.06 (s), 124.63 (s), 123.82 (s), 122.37 (s), 122.08 (s), 116.79 (d, *J* = 20.0 Hz), 115.75 (s), 112.79 (s), 64.29 (s), 29.86 (s), 26.69 (s), 23.90 (s). HRMS (ESI) calcd for C<sub>29</sub>H<sub>23</sub>BrNO<sub>4</sub>S [M+H]<sup>+</sup>: 560.05257, found 560.05229.



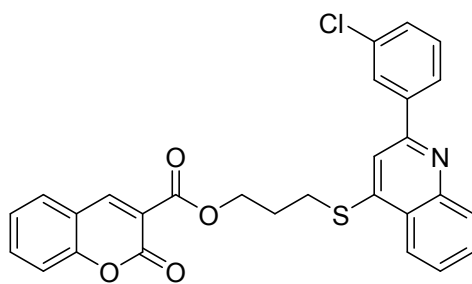

**A21**

**Figure S21**

**3-((2-(3-chlorophenyl)quinolin-4-yl)thio)propyl 2-oxo-2H-chromene-3-carboxylate (A21)** White solid, m.p. 165.0-165.9 °C, yield 63%; <sup>1</sup>H NMR (400 MHz, Chloroform-*d*) δ 8.50 (s, 1H, Ph-H), 8.15 (dd, *J* = 8.4, 0.8 Hz, 1H, Ph-H), 8.13 – 8.10 (m, 2H, Ph-H), 7.99 – 7.96 (m, 1H, Ph-H), 7.75 – 7.70 (m, 2H, Ph-H), 7.66 (ddd, *J* = 8.6, 7.4, 1.6 Hz, 1H, Ph-H), 7.57 – 7.52 (m, 2H, Ph-H), 7.38 – 7.27 (m, 4H, Ph-H), 4.53 (t, *J* = 5.9 Hz, 2H, -COO-CH<sub>2</sub>CH<sub>2</sub>CH<sub>2</sub>-S-), 3.45 (t, *J* = 7.2 Hz, 2H, -COO-CH<sub>2</sub>CH<sub>2</sub>CH<sub>2</sub>-S-), 2.35 – 2.28 (m, 2H, -COO-CH<sub>2</sub>CH<sub>2</sub>CH<sub>2</sub>-S-). <sup>13</sup>C NMR (101 MHz, Chloroform-*d*) δ 162.41 (s), 155.64 (s), 154.15 (d, *J* = 7.6 Hz), 148.16 (s), 146.53 (d, *J* = 19.7 Hz), 140.51 (s), 133.74 (s), 133.53 (s), 129.39 – 128.84 (m), 128.56 (s), 128.18 (s), 126.74 (s), 125.43 (s), 124.73 (d, *J* = 3.9 Hz), 123.86 (s), 122.39 (s), 116.81 (d, *J* = 15.4 Hz), 115.77 (s), 113.03 (s), 63.12 (s), 26.65 (d, *J* = 10.3 Hz). HRMS (ESI) calcd for C<sub>28</sub>H<sub>21</sub>ClNO<sub>4</sub>S [M+H]<sup>+</sup>: 502.08743, found 502.08754.

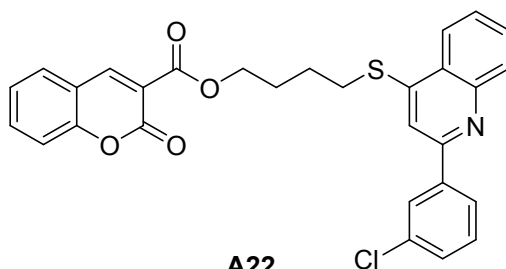

**A22**

**Figure S22**

**4-((2-(3-chlorophenyl)quinolin-4-yl)thio)butyl 2-oxo-2H-chromene-3-carboxylate (A22)** White solid, m.p. 114.0-115.7 °C, yield 57%; <sup>1</sup>H NMR (400 MHz, Chloroform-*d*) δ 8.37 (s, 1H, Ph-H), 8.08 – 8.01 (m, 3H, Ph-H), 7.90 (dt, *J* = 7.3, 1.6 Hz, 1H, Ph-H), 7.65 (ddd, *J* = 8.4, 6.9, 1.4 Hz, 1H, Ph-H), 7.59 – 7.54 (m, 2H, Ph-H), 7.48 – 7.42 (m, 2H, Ph-H), 7.39 – 7.31 (m, 2H, Ph-H), 7.24 (ddd, *J* = 8.6, 5.7, 1.9 Hz, 2H, Ph-H), 4.38 (t, *J* = 5.8 Hz, 2H, -COO-CH<sub>2</sub>CH<sub>2</sub>CH<sub>2</sub>CH<sub>2</sub>-S-), 3.24 (t, *J* = 6.7 Hz, 2H, -COO-

CH<sub>2</sub>CH<sub>2</sub>CH<sub>2</sub>CH<sub>2</sub>-S-), 1.99 (dt, *J* = 6.5, 3.3 Hz, 4H, -COO-CH<sub>2</sub>CH<sub>2</sub>CH<sub>2</sub>CH<sub>2</sub>-S-). <sup>13</sup>C NMR (101 MHz, Chloroform-*d*) δ 162.27 (s), 155.55 (s), 154.16 (s), 153.95 (s), 147.83 (s), 147.11 (s), 146.41 (s), 140.53 (s), 133.88 (s), 133.42 (s), 129.38 – 128.92 (m), 128.38 (d, *J* = 18.7 Hz), 126.71 (s), 125.39 (s), 124.66 (d, *J* = 9.7 Hz), 123.80 (s), 122.41 (s), 117.01 (s), 116.73 (s), 115.77 (s), 112.93 (s), 64.29 (s), 29.95 (s), 26.73 (s), 23.97 (s). HRMS (ESI) calcd for C<sub>29</sub>H<sub>23</sub>ClNO<sub>4</sub>S [M+H]<sup>+</sup>: 516.10308, found 516.10302.

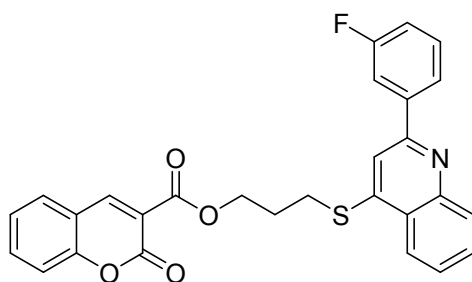

**A23**

**Figure S23**

**3-((2-(3-fluorophenyl)quinolin-4-yl)thio)propyl 2-oxo-2H-chromene-3-carboxylate (A23)** White solid, m.p. 155.0-156.1 °C, yield 53%; <sup>1</sup>H NMR (400 MHz, Chloroform-*d*) δ 8.50 (s, 1H, Ph-H), 8.13 (ddd, *J* = 12.6, 8.4, 0.7 Hz, 2H, Ph-H), 7.89 – 7.83 (m, 2H, Ph-H), 7.75 – 7.70 (m, 2H, Ph-H), 7.66 (ddd, *J* = 8.7, 7.4, 1.6 Hz, 1H, Ph-H), 7.58 – 7.52 (m, 2H, Ph-H), 7.40 (td, *J* = 8.0, 5.9 Hz, 1H, Ph-H), 7.37 – 7.31 (m, 2H, Ph-H), 7.03 (tdd, *J* = 8.4, 2.6, 0.8 Hz, 1H, Ph-H), 4.54 (t, *J* = 5.9 Hz, 2H, -COO-CH<sub>2</sub>CH<sub>2</sub>CH<sub>2</sub>-S-), 3.45 (t, *J* = 7.2 Hz, 2H, -COO-CH<sub>2</sub>CH<sub>2</sub>CH<sub>2</sub>-S-), 2.35 – 2.28 (m, 2H, -COO-CH<sub>2</sub>CH<sub>2</sub>CH<sub>2</sub>-S-). <sup>13</sup>C NMR (101 MHz, Chloroform-*d*) δ 162.42 (s), 162.11 (d, *J* = 245.6 Hz), 155.65 (s), 154.19 (d, *J* = 2.0 Hz), 148.16 (s), 146.48 (d, *J* = 11.1 Hz), 140.99 (d, *J* = 7.5 Hz), 133.53 (s), 129.26 (s), 129.21 (d, *J* = 8.4 Hz), 129.11 (s), 128.56 (s), 125.40 (s), 124.73 (s), 123.86 (s), 122.38 (s), 122.20 (d, *J* = 2.8 Hz), 116.82 (d, *J* = 16.8 Hz), 115.78 (s), 115.07 (d, *J* = 21.3 Hz), 113.56 (d, *J* = 22.7 Hz), 113.05 (s), 63.14 (s), 26.63 (d, *J* = 8.8 Hz). <sup>19</sup>F NMR (377 MHz, Chloroform-*d*) δ -112.66 (s). HRMS (ESI) calcd for C<sub>28</sub>H<sub>21</sub>FNO<sub>4</sub>S [M+H]<sup>+</sup>: 486.11698, found 486.11654.

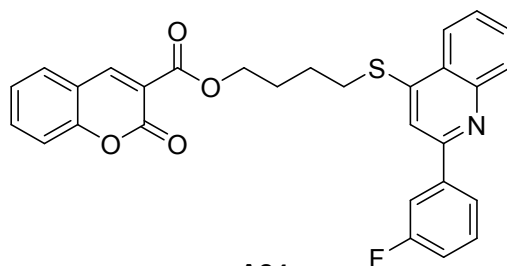

**A24**

**Figure S24**

**4-((2-(3-fluorophenyl)quinolin-4-yl)thio)butyl 2-oxo-2H-chromene-3-carboxylate**

**(A24)** White solid, m.p. 128.8-130.8 °C, yield 57%; <sup>1</sup>H NMR (400 MHz, Chloroform-*d*) δ 8.45 (s, 1H, Ph-H), 8.15 – 8.08 (m, 2H, Ph-H), 7.89 – 7.84 (m, 2H, Ph-H), 7.71 (ddd, *J* = 8.4, 6.9, 1.3 Hz, 1H, Ph-H), 7.66 – 7.61 (m, 2H, Ph-H), 7.55 – 7.44 (m, 3H, Ph-H), 7.33 – 7.28 (m, 2H, Ph-H), 7.15 – 7.10 (m, 1H, Ph-H), 4.44 (t, *J* = 5.8 Hz, 2H, -COO-CH<sub>2</sub>CH<sub>2</sub>CH<sub>2</sub>CH<sub>2</sub>-S-), 3.30 (t, *J* = 6.7 Hz, 2H, -COO-CH<sub>2</sub>CH<sub>2</sub>CH<sub>2</sub>CH<sub>2</sub>-S-), 2.06 (dt, *J* = 6.4, 3.3 Hz, 4H, -COO-CH<sub>2</sub>CH<sub>2</sub>CH<sub>2</sub>CH<sub>2</sub>-S-). <sup>13</sup>C NMR (101 MHz, Chloroform-*d*) δ 162.27 (s), 162.24 (d, *J* = 245.8 Hz), 155.56 (s), 154.16 (s), 154.06 (d, *J* = 2.7 Hz), 147.84 (s), 147.04 (s), 146.40 (s), 141.05 (d, *J* = 7.5 Hz), 133.42 (s), 129.29 (d, *J* = 8.0 Hz), 129.28 (s), 128.48 (s), 125.36 (s), 124.72 (s), 123.80 (s), 122.40 (s), 122.08 (d, *J* = 2.8 Hz), 117.01 (s), 116.74 (s), 115.76 (s), 115.17 (d, *J* = 21.4 Hz), 113.53 (d, *J* = 22.7 Hz), 112.97 (s), 64.30 (s), 29.93 (s), 26.73 (s), 23.97 (s). <sup>19</sup>F NMR (377 MHz, Chloroform-*d*) δ -112.60 (s). HRMS (ESI) calcd for C<sub>29</sub>H<sub>23</sub>FNO<sub>4</sub>S [M+H]<sup>+</sup>: 500.13263, found 500.13261.

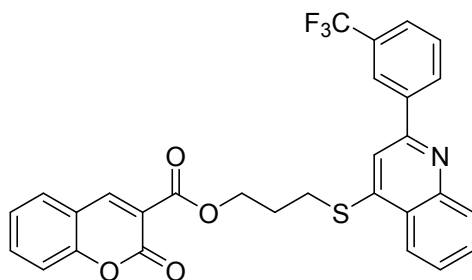

**A25**

**Figure S25**

**3-((2-(3-(trifluoromethyl)phenyl)quinolin-4-yl)thio)propyl 2-oxo-2H-chromene-3-**

**carboxylate (A25)** White solid, m.p. 117.5-119.5 °C, yield 18%; <sup>1</sup>H NMR (400 MHz, Chloroform-*d*) δ 8.49 (s, 1H, Ph-H), 8.43 (s, 1H, Ph-H), 8.29 (d, *J* = 7.5 Hz, 1H, Ph-H), 8.16 (ddd, *J* = 13.8, 8.4, 0.7 Hz, 2H, Ph-H), 7.77 – 7.72 (m, 2H, Ph-H), 7.66 (ddd,

$J = 8.6, 7.3, 1.6$  Hz, 1H, Ph-H), 7.63 – 7.54 (m, 4H, Ph-H), 7.36 – 7.31 (m, 2H, Ph-H), 4.54 (t,  $J = 6.0$  Hz, 2H, -COO-CH<sub>2</sub>CH<sub>2</sub>CH<sub>2</sub>-S-), 3.47 (t,  $J = 7.2$  Hz, 2H, -COO-CH<sub>2</sub>CH<sub>2</sub>CH<sub>2</sub>-S-), 2.36 – 2.29 (m, 2H, -COO-CH<sub>2</sub>CH<sub>2</sub>CH<sub>2</sub>-S-). <sup>13</sup>C NMR (101 MHz, Chloroform-*d*)  $\delta$  162.46 (s), 155.59 (s), 154.23 (s), 154.00 (s), 148.11 (s), 146.83 (s), 146.52 (s), 139.50 (s), 133.52 (s), 130.14 (d,  $J = 32.3$  Hz), 129.84 (s), 129.27 (d,  $J = 13.9$  Hz), 128.55 (s), 128.17 (s), 125.56 (s), 124.82 (s), 124.78 (d,  $J = 3.8$  Hz), 123.87 (s), 123.58 (d,  $J = 3.9$  Hz), 123.25 (d,  $J = 298.6$  Hz), 122.47 (s), 117.02 (s), 116.76 (s), 115.78 (s), 113.14 (s), 63.09 (s), 26.75 (d,  $J = 5.2$  Hz). <sup>19</sup>F NMR (377 MHz, Chloroform-*d*)  $\delta$  -62.47 (s). HRMS (ESI) calcd for C<sub>29</sub>H<sub>21</sub>F<sub>3</sub>NO<sub>4</sub>S [M+H]<sup>+</sup>: 536.11379, found 536.11369.

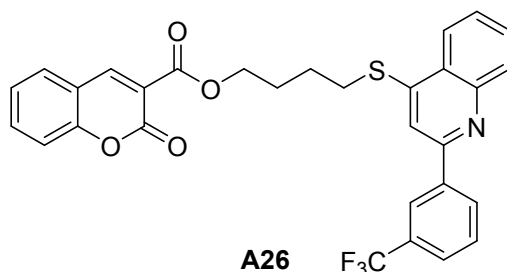

**Figure S26**

**4-((2-(3-(trifluoromethyl)phenyl)quinolin-4-yl)thio)butyl 2-oxo-2H-chromene-3-carboxylate (A26)** White solid, m.p. 117.0-118.7 °C, yield 23%; <sup>1</sup>H NMR (400 MHz, Chloroform-*d*)  $\delta$  8.45 (s, 1H, Ph-H), 8.29 (d,  $J = 7.7$  Hz, 1H, Ph-H), 8.18 – 8.09 (m, 2H, Ph-H), 7.73 (ddd,  $J = 15.0, 8.0, 4.6$  Hz, 2H, Ph-H), 7.63 (dd,  $J = 13.1, 5.6$  Hz, 3H, Ph-H), 7.57 – 7.50 (m, 2H, Ph-H), 7.30 (dd,  $J = 11.4, 4.3$  Hz, 2H, Ph-H), 4.45 (t,  $J = 5.5$  Hz, 2H, -COO-CH<sub>2</sub>CH<sub>2</sub>CH<sub>2</sub>CH<sub>2</sub>-S-), 3.33 (t,  $J = 6.5$  Hz, 2H, -COO-CH<sub>2</sub>CH<sub>2</sub>CH<sub>2</sub>CH<sub>2</sub>-S-), 2.10 – 2.04 (m, 4H, -COO-CH<sub>2</sub>CH<sub>2</sub>CH<sub>2</sub>CH<sub>2</sub>-S-). <sup>13</sup>C NMR (101 MHz, Chloroform-*d*)  $\delta$  162.31 (s), 155.55 (s), 154.16 (s), 153.84 (s), 147.86 (s), 147.34 (s), 146.44 (s), 139.50 (s), 133.43 (s), 130.53 (d,  $J = 32.2$  Hz), 129.73 (s), 129.25 (d,  $J = 15.8$  Hz), 128.47 (s), 128.27 (s), 125.51 (s), 124.87 (d,  $J = 3.9$  Hz), 124.75 (s), 123.81 (s), 123.48 (d,  $J = 3.7$  Hz), 123.27 (d,  $J = 298.2$  Hz), 122.44 (s), 117.03 (s), 116.74 (s), 115.76 (s), 112.87 (s), 64.32 (s), 30.00 (s), 26.72 (s), 24.00 (s). <sup>19</sup>F NMR (377 MHz, Chloroform-*d*)  $\delta$  -62.47 (s). HRMS (ESI) calcd for C<sub>30</sub>H<sub>23</sub>F<sub>3</sub>NO<sub>4</sub>S [M+H]<sup>+</sup>: 550.12944, found 550.12937.

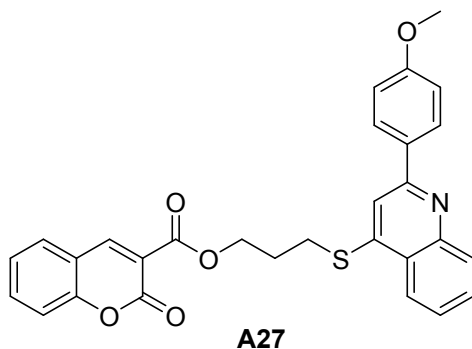

**Figure S27**

**3-((2-(4-methoxyphenyl)quinolin-4-yl)thio)propyl 2-oxo-2H-chromene-3-carboxylate (A27)** White solid, m.p. 131.0-131.5 °C, yield 9%; <sup>1</sup>H NMR (400 MHz, Chloroform-*d*) δ 8.48 (s, 1H, Ph-H), 8.14 – 8.06 (m, 4H, Ph-H), 7.71 – 7.63 (m, 3H, Ph-H), 7.55 – 7.47 (m, 2H, Ph-H), 7.33 (dd, *J* = 12.2, 4.6 Hz, 2H, Ph-H), 6.98 – 6.94 (m, 2H, Ph-H), 4.53 (t, *J* = 6.0 Hz, 2H, -COO-CH<sub>2</sub>CH<sub>2</sub>CH<sub>2</sub>-S-), 3.80 (s, 3H, Ph-OCH<sub>3</sub>), 3.42 (t, *J* = 7.2 Hz, 2H, -COO-CH<sub>2</sub>CH<sub>2</sub>CH<sub>2</sub>-S-), 2.34 – 2.28 (m, 2H, -COO-CH<sub>2</sub>CH<sub>2</sub>CH<sub>2</sub>-S-). <sup>13</sup>C NMR (101 MHz, Chloroform-*d*) δ 163.31 (s), 160.77 (s), 156.58 (s), 156.11 (s), 155.21 (s), 149.00 (s), 134.46 (s), 129.93 (d, *J* = 2.6 Hz), 129.57 (s), 128.98 (s), 125.80 (s), 125.41 (s), 124.84 (s), 123.39 (s), 118.00 (s), 117.77 (s), 116.77 (s), 114.16 (d, *J* = 5.7 Hz), 64.14 (s), 55.27 (s), 27.78 (s), 1.00 (s). HRMS (ESI) calcd for C<sub>29</sub>H<sub>24</sub>NO<sub>5</sub>S [M+H]<sup>+</sup>: 498.13697, found 498.13656.

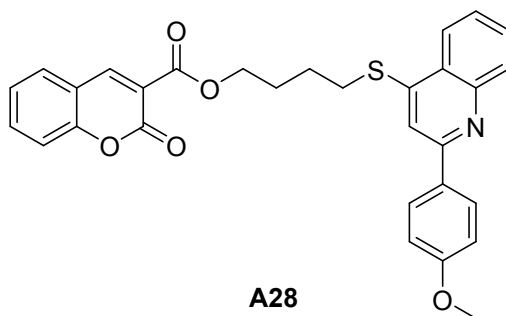

**Figure S28**

**4-((2-(4-methoxyphenyl)quinolin-4-yl)thio)butyl 2-oxo-2H-chromene-3-carboxylate (A28)** White solid, m.p. 138.0-139.8 °C, yield 10%; <sup>1</sup>H NMR (400 MHz, Chloroform-*d*) δ 8.43 (s, 1H, Ph-H), 8.13 – 8.10 (m, 1H, Ph-H), 8.07 (dd, *J* = 7.0, 1.9 Hz, 3H, Ph-H), 7.71 – 7.62 (m, 3H, Ph-H), 7.51 – 7.47 (m, 2H, Ph-H), 7.31 (dd, *J* = 14.3, 7.7 Hz, 2H, Ph-H), 7.04 – 7.00 (m, 2H, Ph-H), 4.44 (t, *J* = 5.7 Hz, 2H, -COO-CH<sub>2</sub>CH<sub>2</sub>CH<sub>2</sub>CH<sub>2</sub>-S-), 3.87 (s, 3H, Ph-OCH<sub>3</sub>), 3.29 (t, *J* = 6.6 Hz, 2H, -COO-

CH<sub>2</sub>CH<sub>2</sub>CH<sub>2</sub>CH<sub>2</sub>-S-), 2.06 (dd,  $J = 6.2, 2.9$  Hz, 4H, -COO-CH<sub>2</sub>CH<sub>2</sub>CH<sub>2</sub>CH<sub>2</sub>-S-). <sup>13</sup>C NMR (101 MHz, Chloroform-*d*)  $\delta$  162.21 (s), 159.80 (s), 155.58 (s), 155.05 (s), 154.16 (s), 147.78 (s), 133.40 (s), 128.92 (d,  $J = 16.0$  Hz), 128.51 (s), 127.87 (s), 124.73 (s), 124.36 (s), 123.80 (s), 122.38 (s), 117.01 (s), 116.76 (s), 115.75 (s), 113.21 (s), 112.95 (s), 64.27 (s), 54.39 (s), 29.91 (s), 26.76 (s), 24.01 (s). HRMS (ESI) calcd for C<sub>30</sub>H<sub>26</sub>NO<sub>5</sub>S [M+H]<sup>+</sup>: 512.15262, found 512.15283.

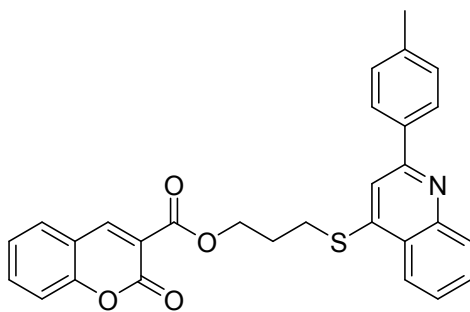

**A29**

**Figure S29**

**3-((2-(p-tolyl)quinolin-4-yl)thio)propyl 2-oxo-2H-chromene-3-carboxylate (29)**

White solid, m.p. 103.5-104.3 °C, yield 30%; <sup>1</sup>H NMR (400 MHz, Chloroform-*d*)  $\delta$  8.47 (s, 1H, Ph-H), 8.12 (ddd,  $J = 12.5, 8.4, 0.7$  Hz, 2H, Ph-H), 8.00 (d,  $J = 8.2$  Hz, 2H, Ph-H), 7.73 – 7.63 (m, 3H, Ph-H), 7.55 – 7.49 (m, 2H, Ph-H), 7.37 – 7.30 (m, 2H, Ph-H), 7.24 (d,  $J = 7.9$  Hz, 2H, Ph-H), 4.53 (t,  $J = 6.0$  Hz, 2H, -COO-CH<sub>2</sub>CH<sub>2</sub>CH<sub>2</sub>-S-), 3.43 (t,  $J = 7.2$  Hz, 2H, -COO-CH<sub>2</sub>CH<sub>2</sub>CH<sub>2</sub>-S-), 2.33 – 2.29 (m, 5H, Ph-OCH<sub>3</sub>, -COO-CH<sub>2</sub>CH<sub>2</sub>CH<sub>2</sub>-S-). <sup>13</sup>C NMR (101 MHz, Chloroform-*d*)  $\delta$  162.29 (s), 155.60 (s), 154.18 (s), 148.02 (s), 146.60 (s), 145.85 (s), 138.35 (s), 135.86 (s), 133.48 (s), 129.13 (s), 128.87 (s), 128.51 (d,  $J = 12.1$  Hz), 126.45 (d,  $J = 5.5$  Hz), 124.93 (s), 124.52 (s), 123.84 (s), 122.36 (s), 116.84 (d,  $J = 18.8$  Hz), 115.76 (s), 113.32 (s), 63.14 (s), 26.69 (d,  $J = 11.6$  Hz), 20.22 (s). HRMS (ESI) calcd for C<sub>29</sub>H<sub>24</sub>NO<sub>5</sub>S [M+H]<sup>+</sup>: 482.14206, found 482.14212.

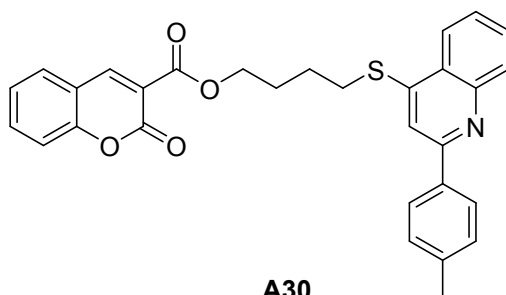

**A30**

**Figure S30**

**4-((2-(p-tolyl)quinolin-4-yl)thio)butyl 2-oxo-2H-chromene-3-carboxylate (A30)**

White solid, m.p. 80.2-82.0 °C, yield 45%; <sup>1</sup>H NMR (400 MHz, Chloroform-*d*) δ 8.43 (s, 1H, Ph-H), 8.11 (ddd, *J* = 14.3, 8.4, 0.8 Hz, 2H, Ph-H), 8.01 – 7.98 (m, 2H, Ph-H), 7.69 (ddd, *J* = 8.4, 6.9, 1.4 Hz, 1H, Ph-H), 7.66 – 7.61 (m, 2H, Ph-H), 7.52 – 7.48 (m, 2H, Ph-H), 7.34 – 7.28 (m, 4H, Ph-H), 4.44 (t, *J* = 5.9 Hz, 2H, -COO-CH<sub>2</sub>CH<sub>2</sub>CH<sub>2</sub>CH<sub>2</sub>-S-), 3.29 (t, *J* = 6.7 Hz, 2H, -COO-CH<sub>2</sub>CH<sub>2</sub>CH<sub>2</sub>CH<sub>2</sub>-S-), 2.41 (s, 3H, Ph-OCH<sub>3</sub>), 2.05 (dt, *J* = 6.5, 3.2 Hz, 4H, -COO-CH<sub>2</sub>CH<sub>2</sub>CH<sub>2</sub>CH<sub>2</sub>-S-). <sup>13</sup>C NMR (101 MHz, Chloroform-*d*) δ 162.15 (s), 155.52 (d, *J* = 15.0 Hz), 154.11 (s), 147.81 (s), 146.43 (d, *J* = 18.3 Hz), 138.43 (s), 135.86 (s), 133.41 (s), 129.12 (s), 128.83 (s), 128.52 (d, *J* = 3.3 Hz), 126.40 (d, *J* = 4.0 Hz), 124.87 (s), 124.45 (s), 123.79 (s), 122.33 (s), 116.81 (d, *J* = 19.5 Hz), 115.72 (s), 113.07 (s), 64.24 (s), 29.80 (s), 26.72 (s), 23.93 (s), 20.32 (s). HRMS (ESI) calcd for C<sub>30</sub>H<sub>26</sub>NO<sub>4</sub>S [M+H]<sup>+</sup>: 496.15771, found 496.15737.

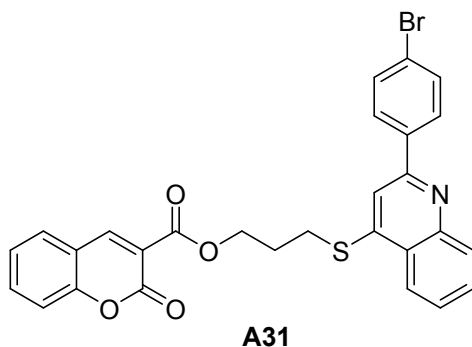

**Figure S31**

**3-((2-(4-bromophenyl)quinolin-4-yl)thio)propyl 2-oxo-2H-chromene-3-**

**carboxylate (A31)** White solid, m.p. 142.1-143.5 °C, yield 16%; <sup>1</sup>H NMR (400 MHz, Chloroform-*d*) δ 8.51 (s, 1H, Ph-H), 8.13 (ddd, *J* = 18.5, 8.4, 0.7 Hz, 2H, Ph-H), 8.04 – 7.95 (m, 2H, Ph-H), 7.75 – 7.64 (m, 3H, Ph-H), 7.62 – 7.47 (m, 4H, Ph-H), 7.40 – 7.32 (m, 2H, Ph-H), 4.53 (t, *J* = 5.9 Hz, 2H, -COO-CH<sub>2</sub>CH<sub>2</sub>CH<sub>2</sub>-S-), 3.45 (t, *J* = 7.2 Hz, 2H, -COO-CH<sub>2</sub>CH<sub>2</sub>CH<sub>2</sub>-S-), 2.31 (dt, *J* = 12.9, 6.3 Hz, 2H, -COO-CH<sub>2</sub>CH<sub>2</sub>CH<sub>2</sub>-S-). <sup>13</sup>C NMR (101 MHz, Chloroform-*d*) δ 162.49 (s), 154.42 (s), 154.21 (s), 148.22 (s), 146.50 (s), 133.65 (s), 130.85 (s), 129.15 (d, *J* = 7.2 Hz), 128.58 (s), 128.23 (s), 125.32 (s), 124.74 (d, *J* = 18.5 Hz), 124.16 (s), 123.95 (s), 122.85 (s), 122.42 (s),

115.88 (s), 63.13 (s), 28.68 (s), 26.61 (s). HRMS (ESI) calcd for C<sub>28</sub>H<sub>21</sub>BrNO<sub>4</sub>S [M+H]<sup>+</sup>: 546.03692, found 546.03701.

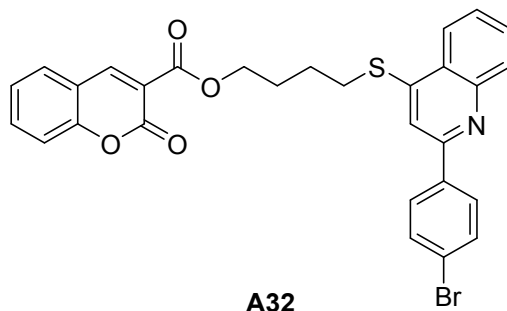

**Figure S32**

**4-((2-(4-bromophenyl)quinolin-4-yl)thio)butyl 2-oxo-2H-chromene-3-carboxylate**

**(A32)** White solid, m.p. 106.7-108.6 °C, yield 29%; <sup>1</sup>H NMR (400 MHz, Chloroform-*d*) δ 8.46 (s, 1H, Ph-H), 8.11 (ddd, *J* = 20.8, 8.4, 0.7 Hz, 2H, Ph-H), 8.02 – 7.99 (m, 2H, Ph-H), 7.71 (ddd, *J* = 8.4, 6.9, 1.4 Hz, 1H, Ph-H), 7.63 (ddd, *J* = 5.6, 3.3, 1.5 Hz, 4H, Ph-H), 7.53 (ddd, *J* = 8.1, 5.8, 1.4 Hz, 2H, Ph-H), 7.34 – 7.31 (m, 2H, Ph-H), 4.44 (d, *J* = 3.9 Hz, 2H, -COO-CH<sub>2</sub>CH<sub>2</sub>CH<sub>2</sub>CH<sub>2</sub>-S-), 3.31 (t, *J* = 6.6 Hz, 2H, -COO-CH<sub>2</sub>CH<sub>2</sub>CH<sub>2</sub>CH<sub>2</sub>-S-), 2.06 (dd, *J* = 5.9, 3.1 Hz, 4H, -COO-CH<sub>2</sub>CH<sub>2</sub>CH<sub>2</sub>CH<sub>2</sub>-S-). <sup>13</sup>C NMR (101 MHz, Chloroform-*d*) δ 162.36 (s), 155.55 (s), 154.17 (s), 147.85 (d, *J* = 13.4 Hz), 147.02 (s), 146.45 (s), 137.59 (s), 133.46 (s), 130.94 (s), 129.13 (d, *J* = 14.9 Hz), 128.50 (s), 128.13 (s), 125.27 (s), 124.62 (s), 123.83 (s), 122.89 (s), 122.42 (s), 116.75 (s), 115.78 (s), 112.80 (s), 64.36 (s), 29.94 (s), 26.73 (s), 24.07 (s). HRMS (ESI) calcd for C<sub>29</sub>H<sub>23</sub>BrNO<sub>4</sub>S [M+H]<sup>+</sup>: 560.05257, found 560.05231.

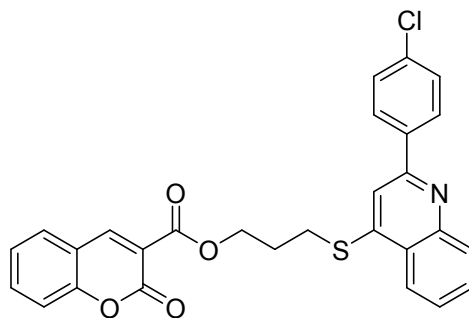

**Figure S33**

**3-((2-(4-chlorophenyl)quinolin-4-yl)thio)propyl 2-oxo-2H-chromene-3-**

**carboxylate (A33)** White solid, m.p. 139.9-140.9 °C, yield 21%; <sup>1</sup>H NMR (400 MHz, Chloroform-*d*) δ 8.50 (s, 1H, Ph-H), 8.16 – 8.13 (m, 1H, Ph-H), 8.10 (d, *J* = 8.3 Hz,



1H, Ph-H), 8.08 – 8.04 (m, 2H, Ph-H), 7.74 – 7.70 (m, 2H, Ph-H), 7.67 (ddd,  $J = 7.5$ , 5.3, 1.5 Hz, 1H, Ph-H), 7.58 – 7.51 (m, 2H, Ph-H), 7.42 – 7.38 (m, 2H, Ph-H), 7.38 – 7.31 (m, 2H, Ph-H), 4.52 (t,  $J = 5.9$  Hz, 2H, -COO-CH<sub>2</sub>CH<sub>2</sub>CH<sub>2</sub>-S-), 3.45 (t,  $J = 7.2$  Hz, 2H, -COO-CH<sub>2</sub>CH<sub>2</sub>CH<sub>2</sub>-S-), 2.34 – 2.27 (m, 2H, -COO-CH<sub>2</sub>CH<sub>2</sub>CH<sub>2</sub>-S-). <sup>13</sup>C NMR (101 MHz, Chloroform-*d*)  $\delta$  162.45 (s), 155.64 (s), 154.26 (d,  $J = 16.4$  Hz), 148.18 (s), 146.46 (d,  $J = 3.2$  Hz), 137.07 (s), 134.43 (s), 133.62 (s), 129.13 (d,  $J = 9.0$  Hz), 128.56 (s), 127.91 (d,  $J = 5.2$  Hz), 125.28 (s), 124.60 (s), 123.92 (s), 122.39 (s), 116.91 (s), 116.70 (s), 115.83 (s), 112.94 (s), 63.12 (s), 26.69 (d,  $J = 16.7$  Hz). HRMS (ESI) calcd for C<sub>28</sub>H<sub>21</sub>ClNO<sub>4</sub>S [M+H]<sup>+</sup>: 502.08743, found 502.08685.

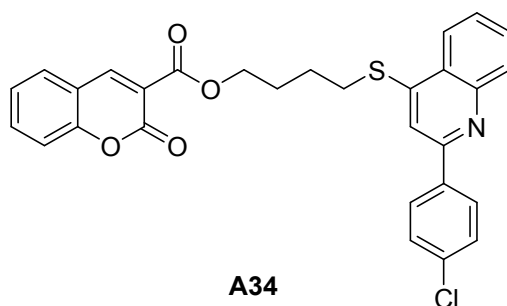

**Figure S34**

**4-((2-(4-chlorophenyl)quinolin-4-yl)thio)butyl 2-oxo-2H-chromene-3-carboxylate (A34)** White solid, m.p. 126.1-127.6 °C, yield 13%; <sup>1</sup>H NMR (400 MHz, Chloroform-*d*)  $\delta$  8.46 (s, 1H, Ph-H), 8.13 (dd,  $J = 8.4$ , 0.9 Hz, 1H, Ph-H), 8.10 – 8.05 (m, 3H, Ph-H), 7.71 (ddd,  $J = 8.4$ , 6.9, 1.4 Hz, 1H, Ph-H), 7.66 – 7.62 (m, 2H, Ph-H), 7.52 (ddd,  $J = 7.2$ , 6.3, 1.3 Hz, 2H, Ph-H), 7.49 – 7.45 (m, 2H, Ph-H), 7.31 (ddd,  $J = 8.6$ , 6.5, 2.7 Hz, 2H, Ph-H), 4.44 (t,  $J = 5.7$  Hz, 2H, -COO-CH<sub>2</sub>CH<sub>2</sub>CH<sub>2</sub>CH<sub>2</sub>-S-), 3.30 (t,  $J = 6.7$  Hz, 2H, -COO-CH<sub>2</sub>CH<sub>2</sub>CH<sub>2</sub>CH<sub>2</sub>-S-), 2.09 – 2.03 (m, 4H, -COO-CH<sub>2</sub>CH<sub>2</sub>CH<sub>2</sub>CH<sub>2</sub>-S-). <sup>13</sup>C NMR (101 MHz, Chloroform-*d*)  $\delta$  162.34 (s), 155.55 (s), 154.19 (d,  $J = 5.2$  Hz), 147.90 (s), 146.98 (s), 146.44 (s), 137.14 (s), 134.50 (s), 133.45 (s), 129.11 (d,  $J = 15.9$  Hz), 128.50 (s), 127.91 (d,  $J = 12.9$  Hz), 125.24 (s), 124.59 (s), 123.82 (s), 122.40 (s), 117.02 (s), 116.75 (s), 115.76 (s), 112.84 (s), 64.35 (s), 29.93 (s), 26.73 (s), 24.05 (s). HRMS (ESI) calcd for C<sub>29</sub>H<sub>23</sub>ClNO<sub>4</sub>S [M+H]<sup>+</sup>: 516.10308, found 516.10239.

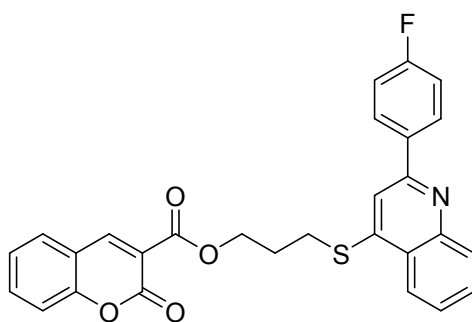

**A35**

**Figure S35**

**3-((2-(4-fluorophenyl)quinolin-4-yl)thio)propyl 2-oxo-2H-chromene-3-carboxylate (A35)** White solid, m.p. 135.6-136.5 °C, yield 26%; <sup>1</sup>H NMR (400 MHz, Chloroform-*d*) δ 8.50 (s, 1H, Ph-H), 8.15 – 8.08 (m, 4H, Ph-H), 7.74 – 7.69 (m, 2H, Ph-H), 7.69 – 7.65 (m, 1H, Ph-H), 7.58 – 7.50 (m, 2H, Ph-H), 7.38 – 7.31 (m, 2H, Ph-H), 7.15 – 7.10 (m, 2H, Ph-H), 4.53 (t, *J* = 5.9 Hz, 2H, -COO-CH<sub>2</sub>CH<sub>2</sub>CH<sub>2</sub>-S-), 3.44 (t, *J* = 7.2 Hz, 2H, -COO-CH<sub>2</sub>CH<sub>2</sub>CH<sub>2</sub>-S-), 2.30 (dd, *J* = 13.0, 6.7 Hz, 2H, -COO-CH<sub>2</sub>CH<sub>2</sub>CH<sub>2</sub>-S-). <sup>13</sup>C NMR (101 MHz, Chloroform-*d*) δ 162.66 (d, *J* = 249.1 Hz), 162.43 (s), 155.62 (s), 154.55 (s), 154.18 (s), 148.17 (s), 146.40 (d, *J* = 17.6 Hz), 134.82 (d, *J* = 3.1 Hz), 133.60 (s), 129.08 (d, *J* = 8.2 Hz), 128.51 (d, *J* = 8.1 Hz), 125.15 (s), 124.48 (s), 123.91 (s), 122.39 (s), 116.91 (s), 116.71 (s), 115.80 (s), 114.66 (d, *J* = 21.6 Hz), 113.03 (s), 63.12 (s), 26.68 (d, *J* = 8.9 Hz). <sup>19</sup>F NMR (376 MHz, Chloroform-*d*) δ -112.38 (s). HRMS (ESI) calcd for C<sub>28</sub>H<sub>21</sub>FNO<sub>4</sub>S [M+H]<sup>+</sup>: 486.11698, found 486.11685.

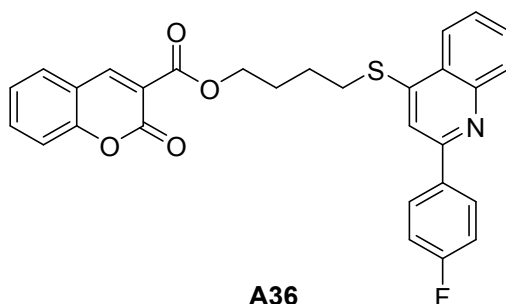

**A36**

**Figure S36**

**4-((2-(4-fluorophenyl)quinolin-4-yl)thio)butyl 2-oxo-2H-chromene-3-carboxylate (A36)** White solid, m.p. 117.4-118.9 °C, yield 9%; <sup>1</sup>H NMR (400 MHz, Chloroform-*d*) δ 8.46 (s, 1H, Ph-H), 8.15 – 8.07 (m, 4H, Ph-H), 7.70 (ddd, *J* = 8.4, 6.9, 1.3 Hz, 1H, Ph-H), 7.67 – 7.61 (m, 2H, Ph-H), 7.54 – 7.50 (m, 2H, Ph-H), 7.34 – 7.29 (m, 2H,

Ph-H), 7.21 – 7.16 (m, 2H, Ph-H), 4.45 (t,  $J = 5.8$  Hz, 2H, -COO-CH<sub>2</sub>CH<sub>2</sub>CH<sub>2</sub>CH<sub>2</sub>-S-), 3.30 (t,  $J = 6.7$  Hz, 2H, -COO-CH<sub>2</sub>CH<sub>2</sub>CH<sub>2</sub>CH<sub>2</sub>-S-), 2.06 (dt,  $J = 6.6, 3.4$  Hz, 4H, -COO-CH<sub>2</sub>CH<sub>2</sub>CH<sub>2</sub>CH<sub>2</sub>-S-). <sup>13</sup>C NMR (101 MHz, Chloroform-*d*)  $\delta$  162.75 (d,  $J = 249.1$  Hz), 162.34 (s), 161.93 (d,  $J = 83.4$  Hz), 155.57 (s), 154.46 (s), 154.18 (s), 147.89 (s), 146.84 (s), 146.46 (s), 133.45 (s), 129.26 (d,  $J = 3.2$  Hz), 129.15 (s), 129.00 (s), 128.45 (d,  $J = 9.5$  Hz), 125.11 (s), 124.48 (s), 123.83 (s), 122.40 (s), 117.04 (s), 116.76 (s), 115.77 (s), 114.75 (d,  $J = 21.5$  Hz), 112.96 (s), 64.34 (s), 29.94 (s), 26.73 (s), 24.02 (s). <sup>19</sup>F NMR (377 MHz, Chloroform-*d*)  $\delta$  -112.38 (s). HRMS (ESI) calcd for C<sub>29</sub>H<sub>23</sub>FNO<sub>4</sub>S [M+H]<sup>+</sup>: 500.13263, found 500.13193.

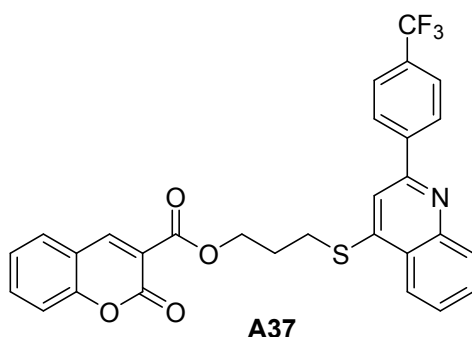

**Figure S37**

**3-((2-(4-(trifluoromethyl)phenyl)quinolin-4-yl)thio)propyl 2-oxo-2H-chromene-3-carboxylate (A37)** White solid, m.p. 156.3-158.2 °C, yield 9%; <sup>1</sup>H NMR (400 MHz, Chloroform-*d*)  $\delta$  8.51 (s, 1H, Ph-H), 8.26 (d,  $J = 8.2$  Hz, 2H, Ph-H), 8.15 (dd,  $J = 15.8, 8.4$  Hz, 2H, Ph-H), 7.79 (s, 1H, Ph-H), 7.76 – 7.65 (m, 4H, Ph-H), 7.56 (t,  $J = 8.2$  Hz, 2H, Ph-H), 7.37 – 7.32 (m, 2H, Ph-H), 4.54 (t,  $J = 5.9$  Hz, 2H, -COO-CH<sub>2</sub>CH<sub>2</sub>CH<sub>2</sub>-S-), 3.47 (t,  $J = 7.3$  Hz, 2H, -COO-CH<sub>2</sub>CH<sub>2</sub>CH<sub>2</sub>-S-), 2.35 – 2.28 (m, 2H, -COO-CH<sub>2</sub>CH<sub>2</sub>CH<sub>2</sub>-S-). <sup>13</sup>C NMR (101 MHz, Chloroform-*d*)  $\delta$  162.55 (s), 155.63 (s), 154.14 (d,  $J = 15.6$  Hz), 148.19 (s), 146.78 (s), 146.54 (s), 142.04 (s), 133.62 (s), 129.97 (d,  $J = 32.3$  Hz), 129.29 (d,  $J = 18.9$  Hz), 128.54 (s), 127.02 (s), 125.60 (s), 124.85 (s), 124.62 (d,  $J = 3.7$  Hz), 123.94 (s), 123.11 (d,  $J = 271.8$  Hz), 122.45 (s), 117.06 (s), 116.74 (s), 115.81 (s), 113.17 (s), 63.15 (s), 26.76 (d,  $J = 14.5$  Hz). <sup>19</sup>F NMR (377 MHz, Chloroform-*d*)  $\delta$  -62.61 (s). HRMS (ESI) calcd for C<sub>29</sub>H<sub>21</sub>F<sub>3</sub>NO<sub>4</sub>S [M+H]<sup>+</sup>: 536.11379, found 536.11363.

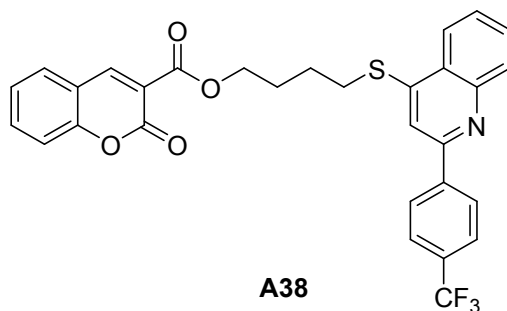

**Figure S38**

**4-((2-(4-(trifluoromethyl)phenyl)quinolin-4-yl)thio)butyl 2-oxo-2H-chromene-3-carboxylate (A38)** White solid, m.p. 91.2-92.5 °C, yield 25%; <sup>1</sup>H NMR (400 MHz, Chloroform-*d*) δ 8.46 (s, 1H, Ph-H), 8.24 (d, *J* = 8.2 Hz, 2H, Ph-H), 8.16 – 8.09 (m, 2H, Ph-H), 7.73 (ddd, *J* = 10.0, 9.5, 4.8 Hz, 3H, Ph-H), 7.67 – 7.61 (m, 2H, Ph-H), 7.53 (ddd, *J* = 9.1, 8.2, 1.1 Hz, 2H, Ph-H), 7.30 (t, *J* = 7.7 Hz, 2H, Ph-H), 4.44 (t, *J* = 5.7 Hz, 2H, -COO-CH<sub>2</sub>CH<sub>2</sub>CH<sub>2</sub>CH<sub>2</sub>-S-), 3.32 (t, *J* = 6.7 Hz, 2H, -COO-CH<sub>2</sub>CH<sub>2</sub>CH<sub>2</sub>CH<sub>2</sub>-S-), 2.09 – 2.04 (m, 4H, -COO-CH<sub>2</sub>CH<sub>2</sub>CH<sub>2</sub>CH<sub>2</sub>-S-). <sup>13</sup>C NMR (101 MHz, Chloroform-*d*) δ 162.39 (s), 155.59 (s), 154.04 (d, *J* = 18.1 Hz), 148.04 (s), 147.35 (s), 146.37 (s), 142.08 (d, *J* = 0.9 Hz), 133.50 (s), 130.00 (d, *J* = 32.5 Hz), 129.24 (d, *J* = 15.2 Hz), 128.49 (s), 126.91 (s), 125.55 (s), 124.71 (d, *J* = 4.1 Hz), 123.84 (s), 123.14 (d, *J* = 272.3 Hz), 122.39 (s), 116.92 (s), 116.70 (s), 115.74 (s), 112.91 (s), 64.40 (s), 29.87 (s), 26.69 (s), 24.02 (s). <sup>19</sup>F NMR (377 MHz, Chloroform-*d*) δ -62.53 (s). HRMS (ESI) calcd for C<sub>30</sub>H<sub>23</sub>F<sub>3</sub>NO<sub>4</sub>S [M+H]<sup>+</sup>: 550.12944, found 550.12864.

2  $^1\text{H}$ ,  $^{13}\text{C}$ ,  $^{19}\text{F}$  NMR, HRMS spectra of target compounds

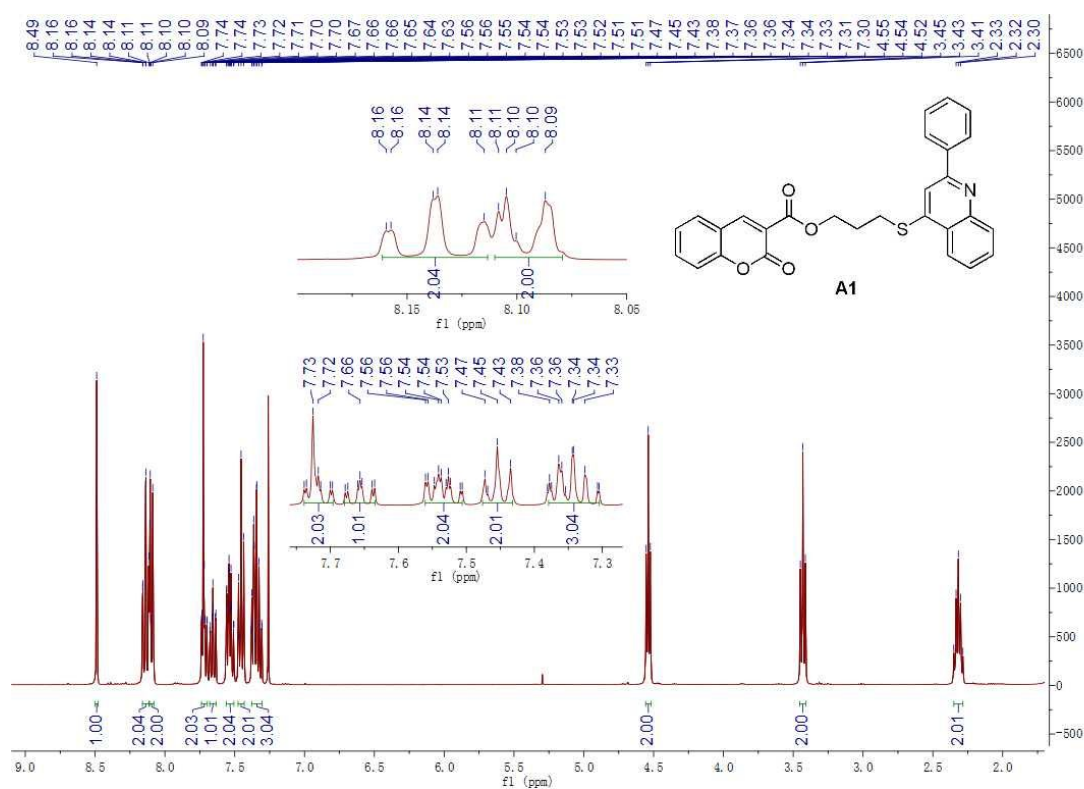

Figure S39  $^1\text{H}$  NMR spectra of compound A1

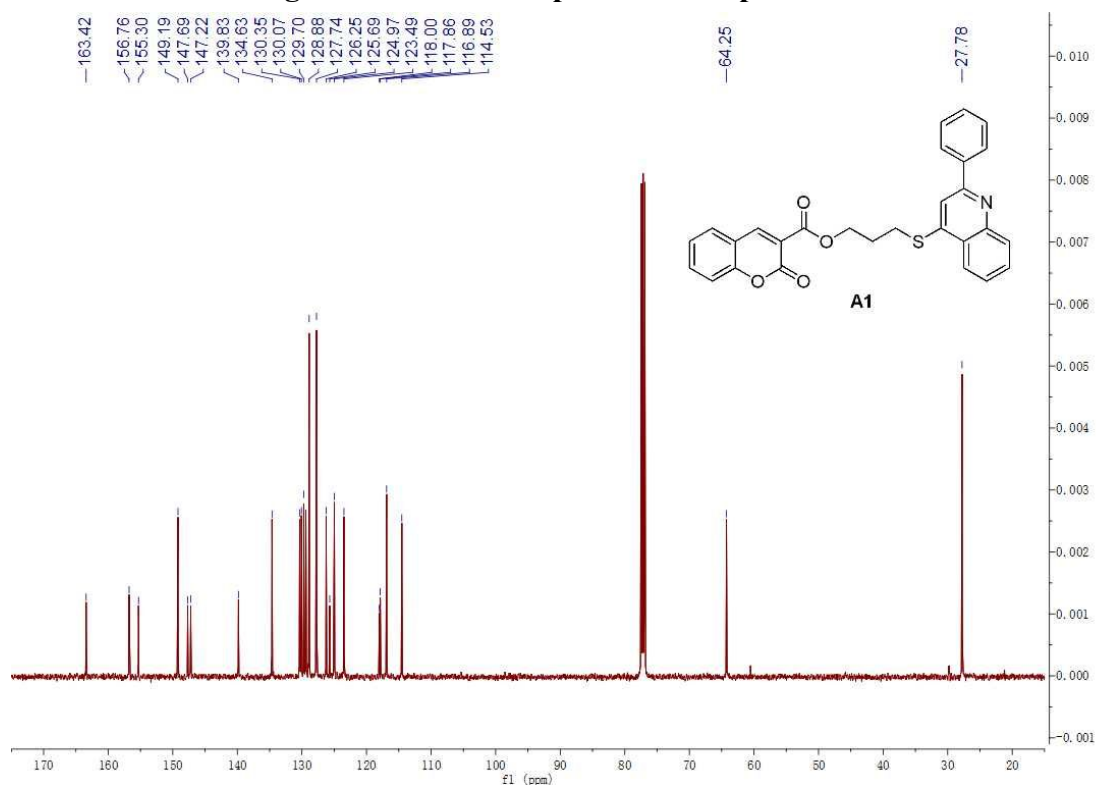

Figure S40  $^{13}\text{C}$  NMR spectra of compound

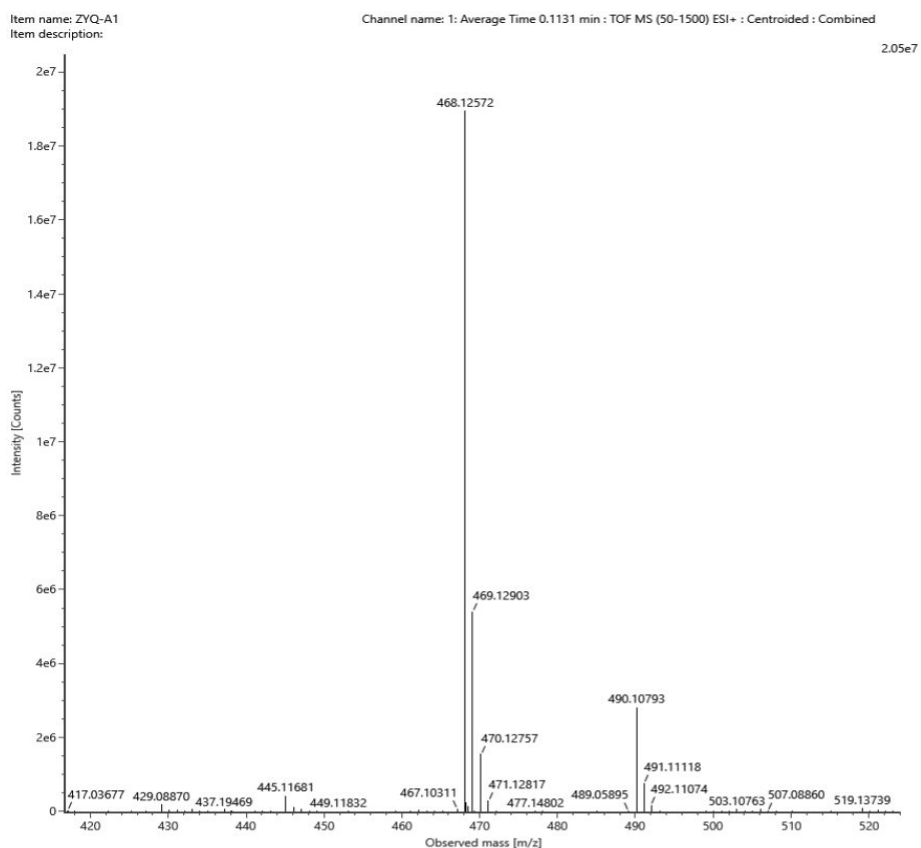

Figure S41 HRMS spectra of compound A1

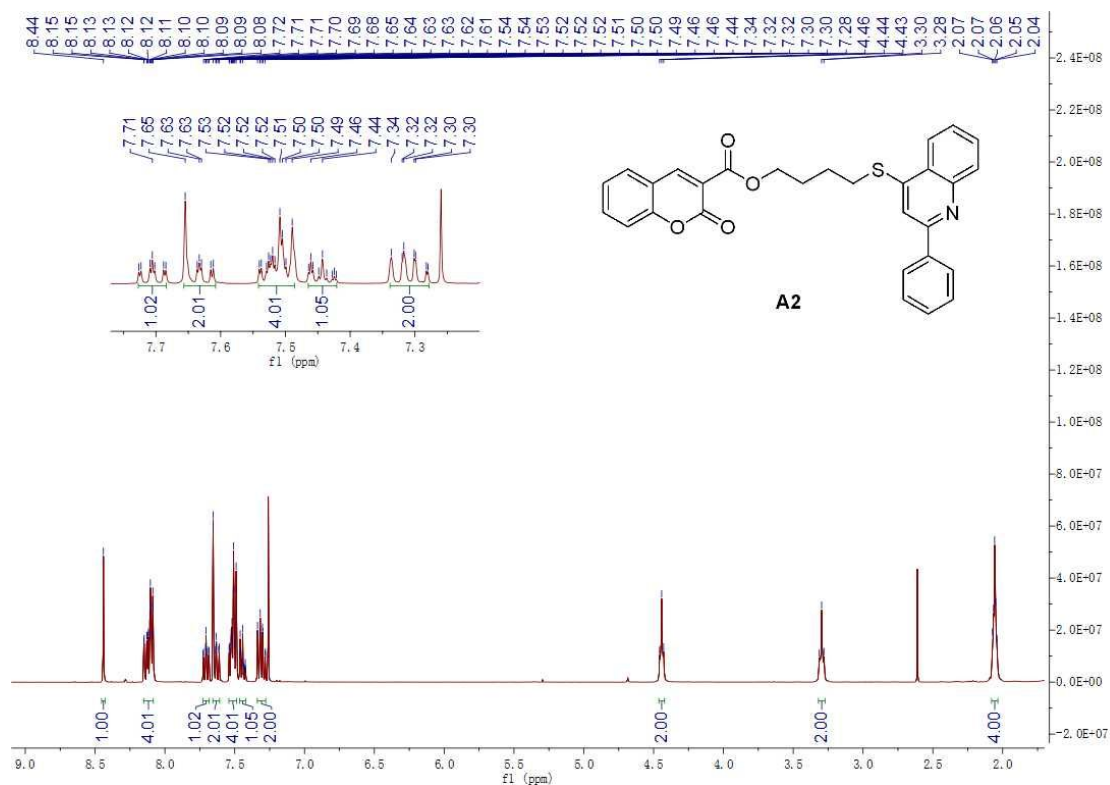

Figure S42 <sup>1</sup>H NMR spectra of compound A2

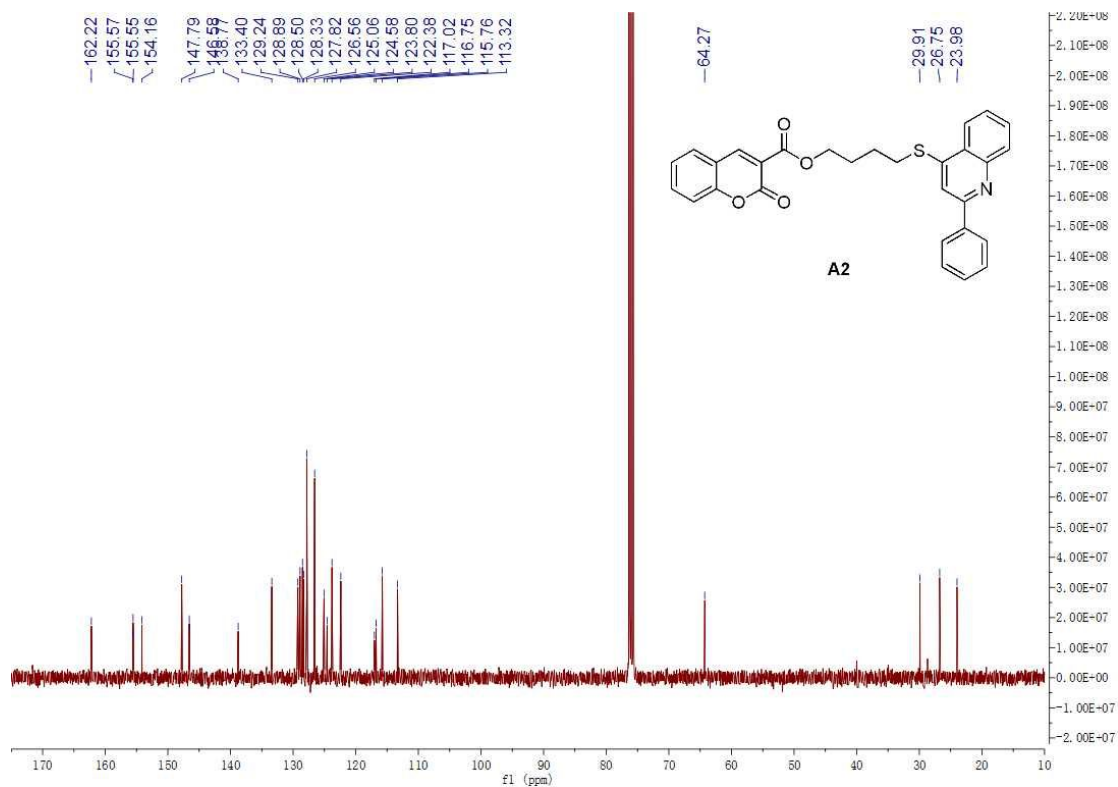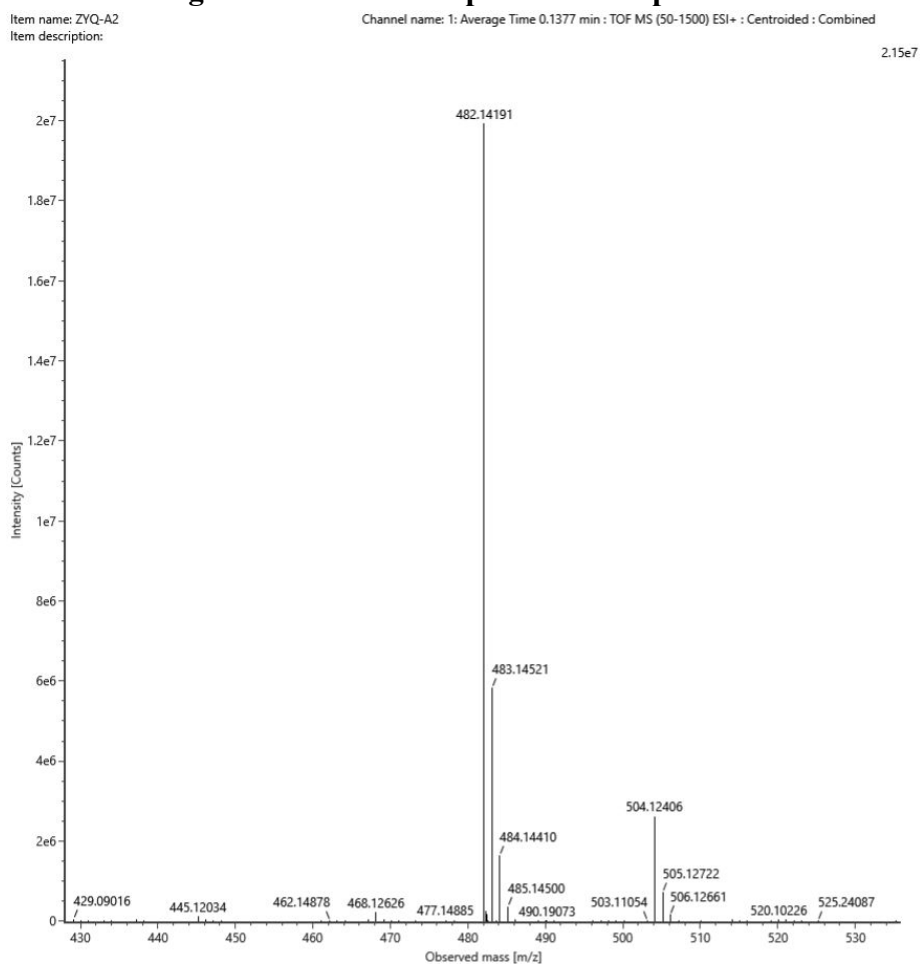

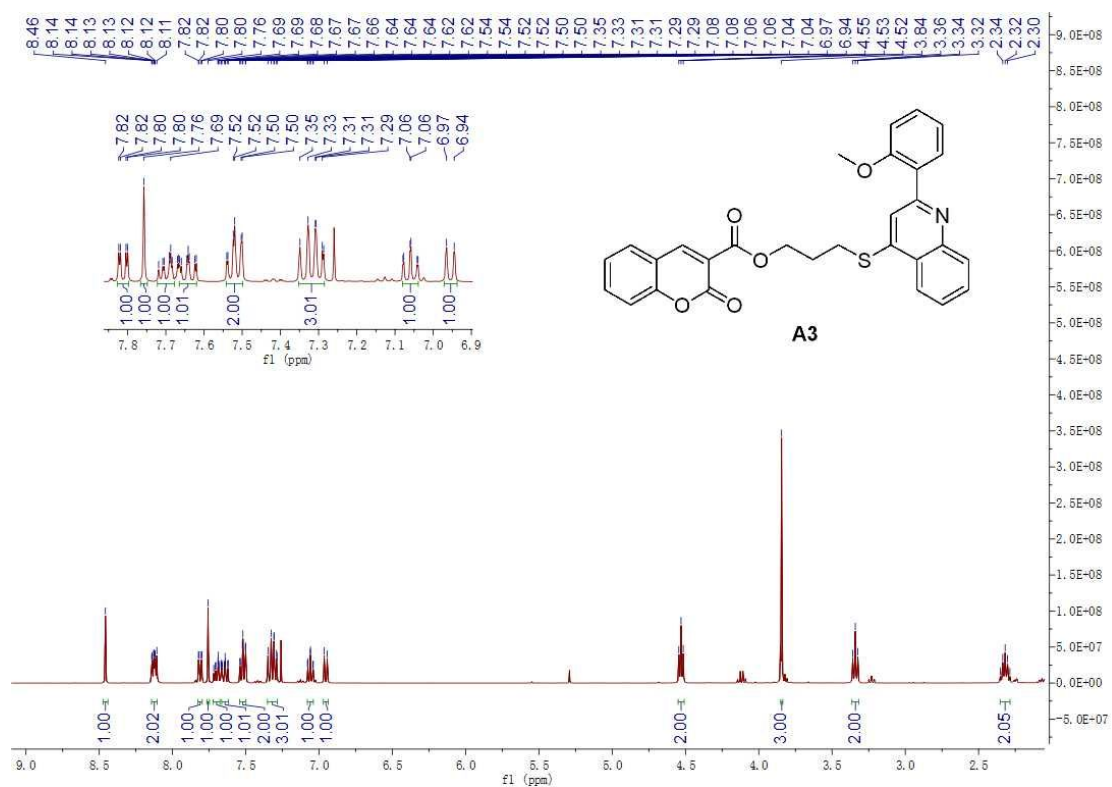

**Figure S45  $^1\text{H}$  NMR spectra of compound A3**

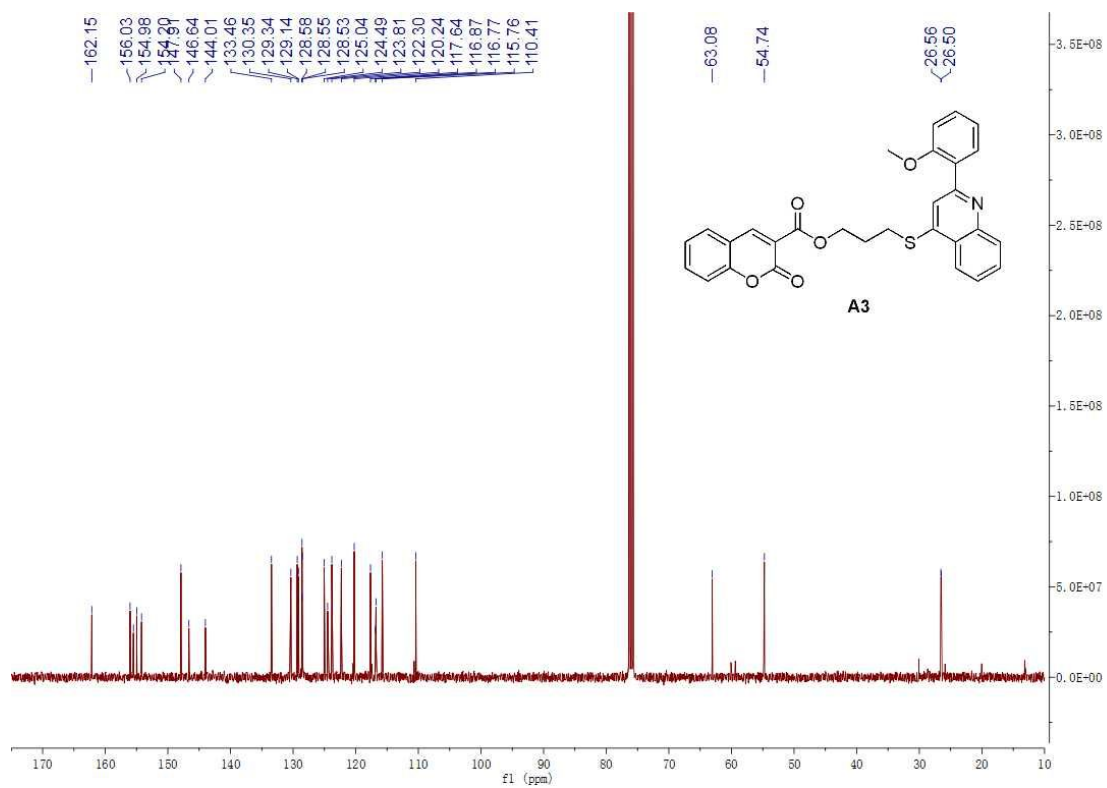

**Figure S46  $^{13}\text{C}$  NMR spectra of compound A3**



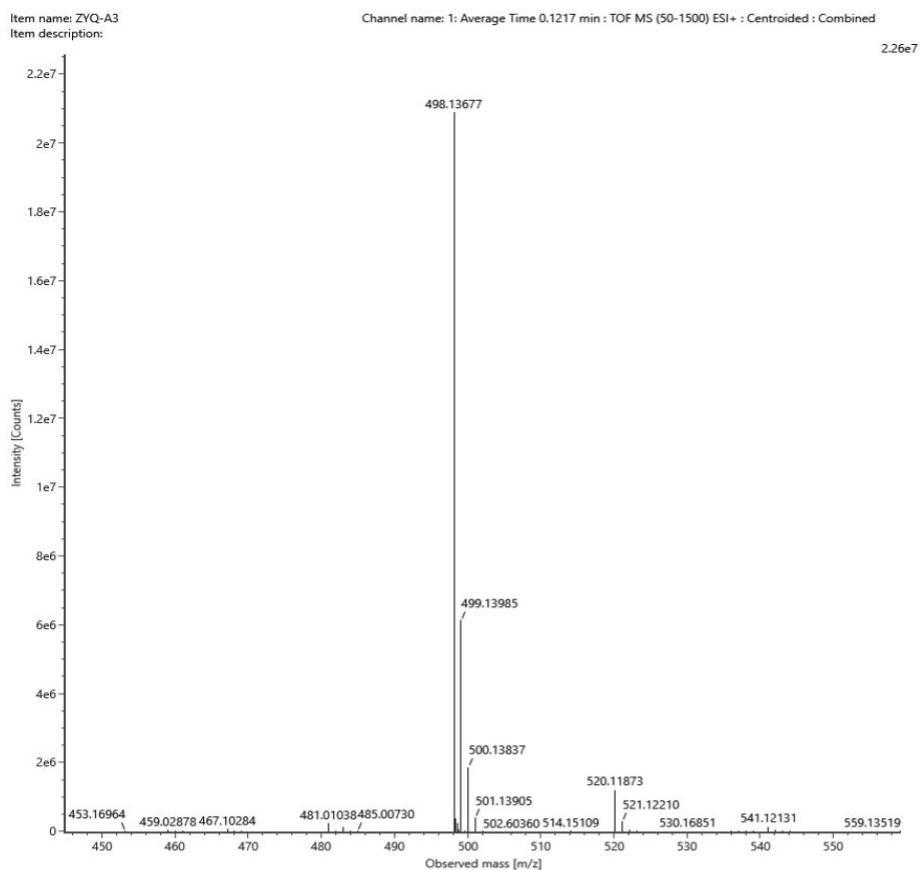

Figure S47 HRMS spectra of compound A3

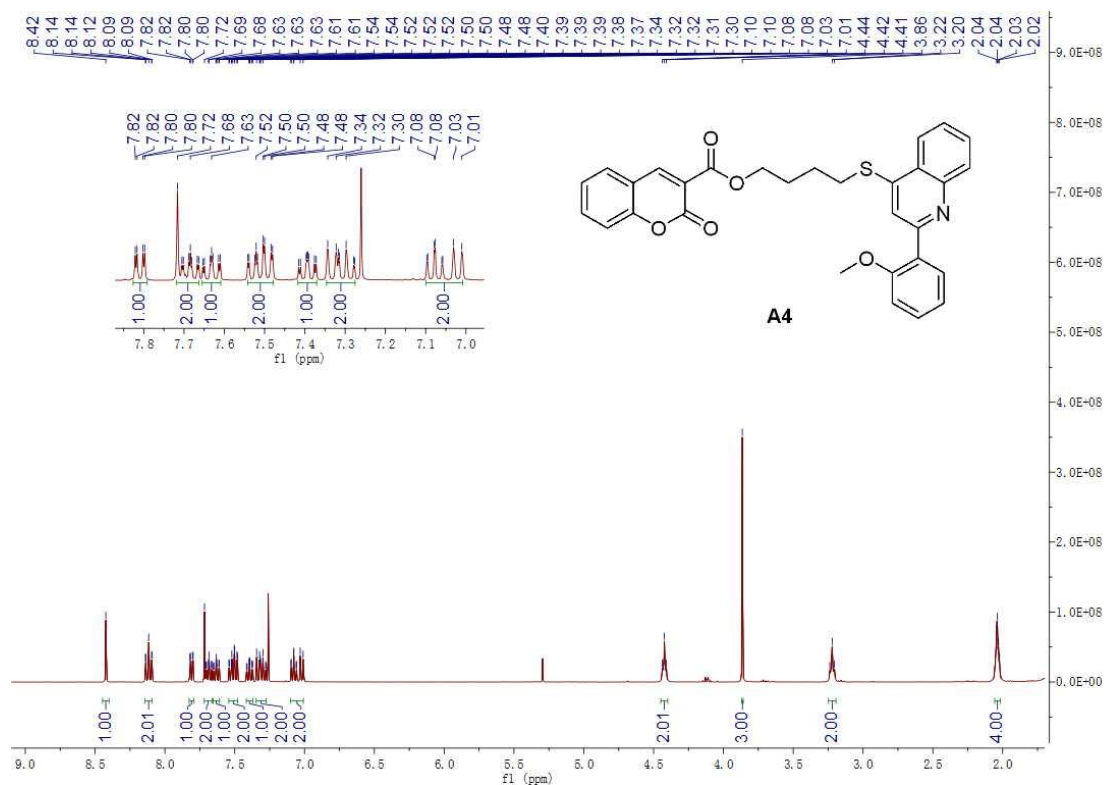

Figure S48 <sup>1</sup>H NMR spectra of compound A4

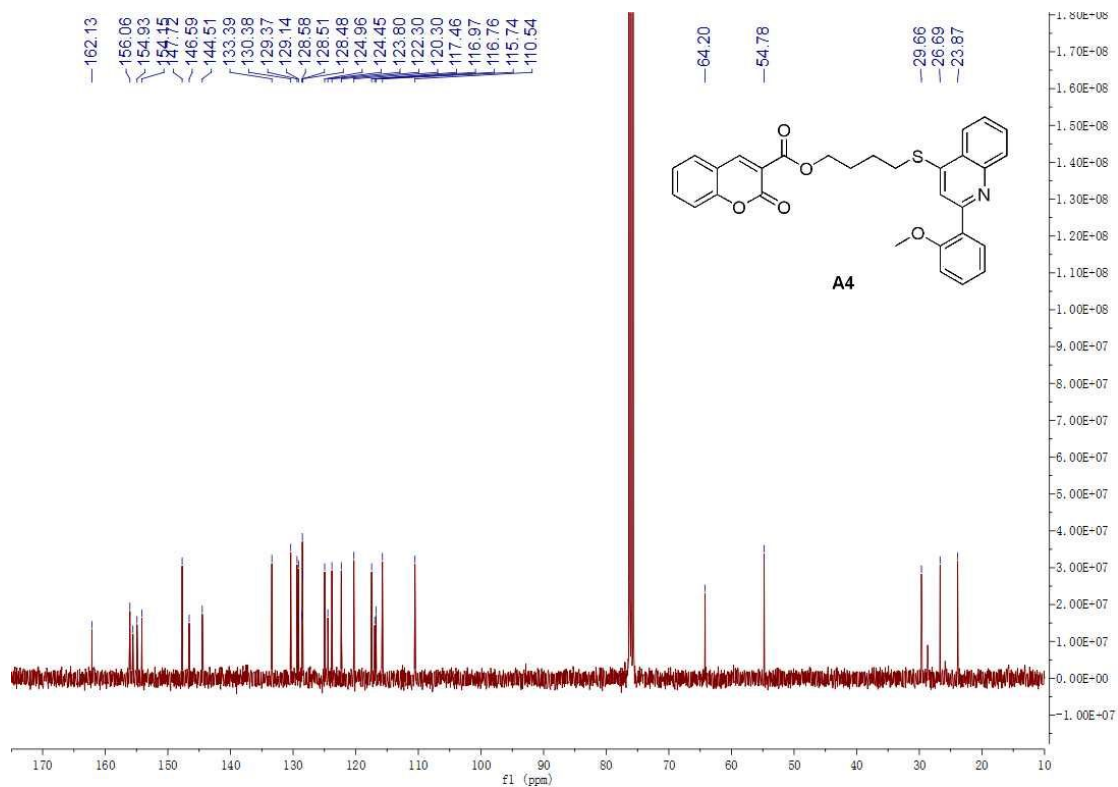

**Figure S49 <sup>13</sup>C NMR spectra of compound A4**

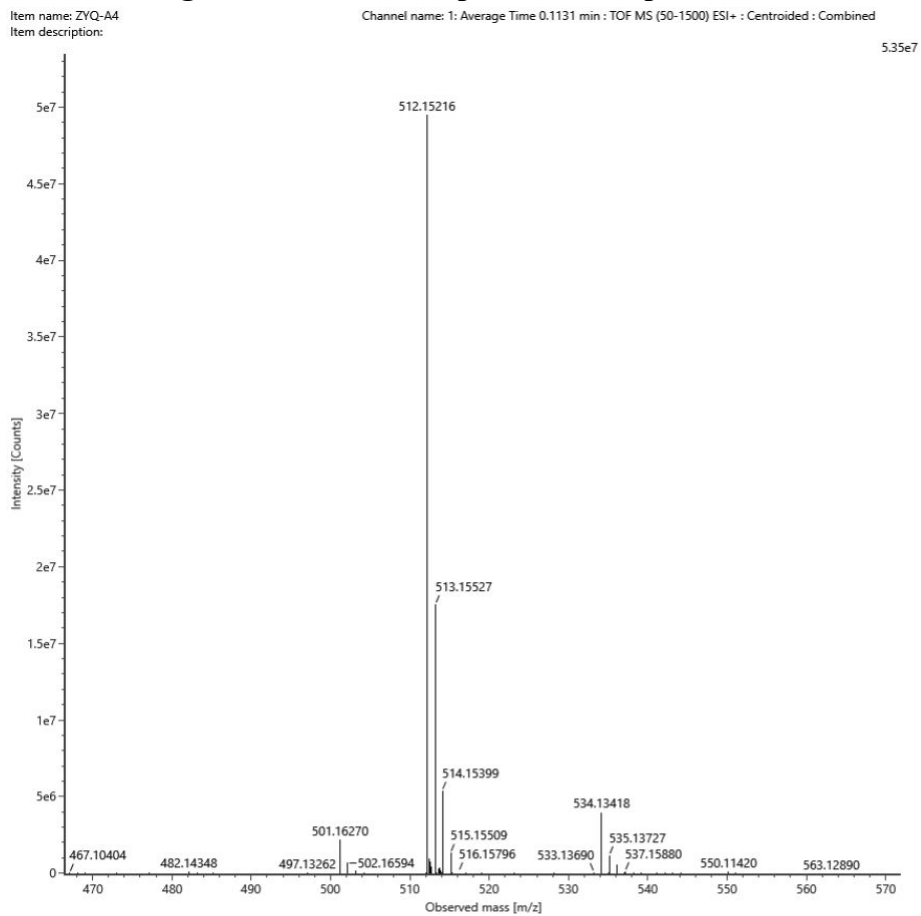

**Figure S50 HRMS spectra of compound A4**

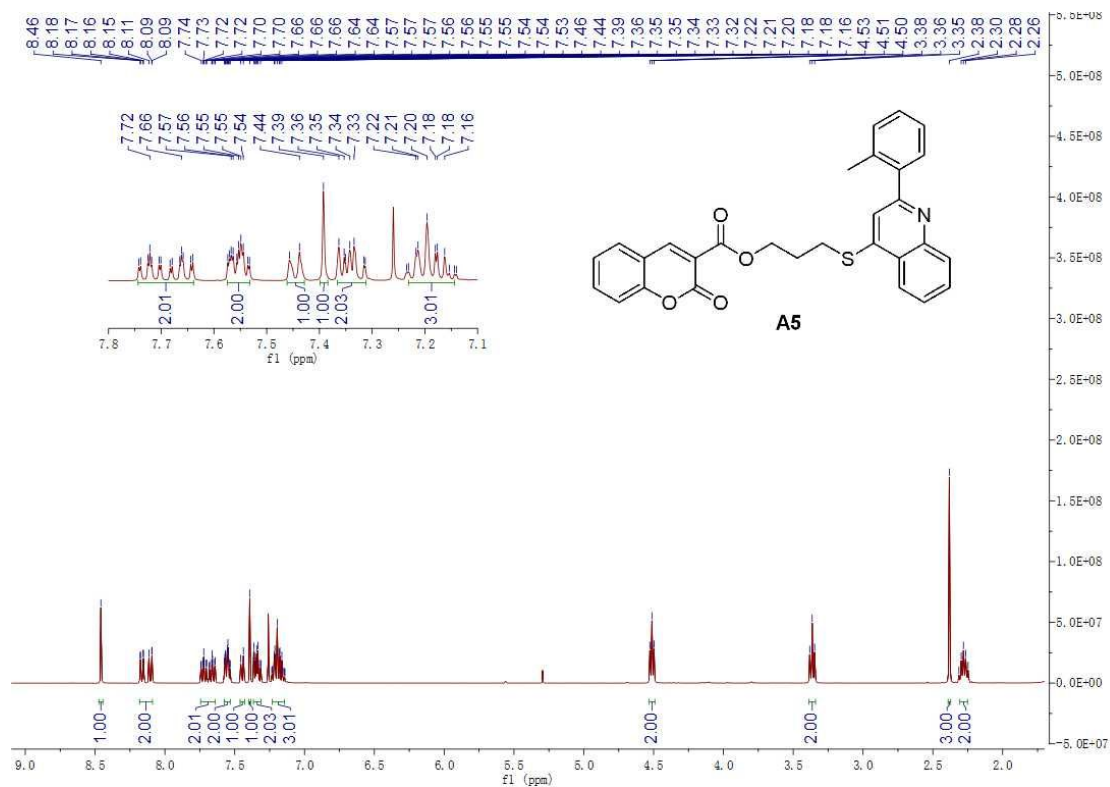

**Figure S51 <sup>1</sup>H NMR spectra of compound A5**

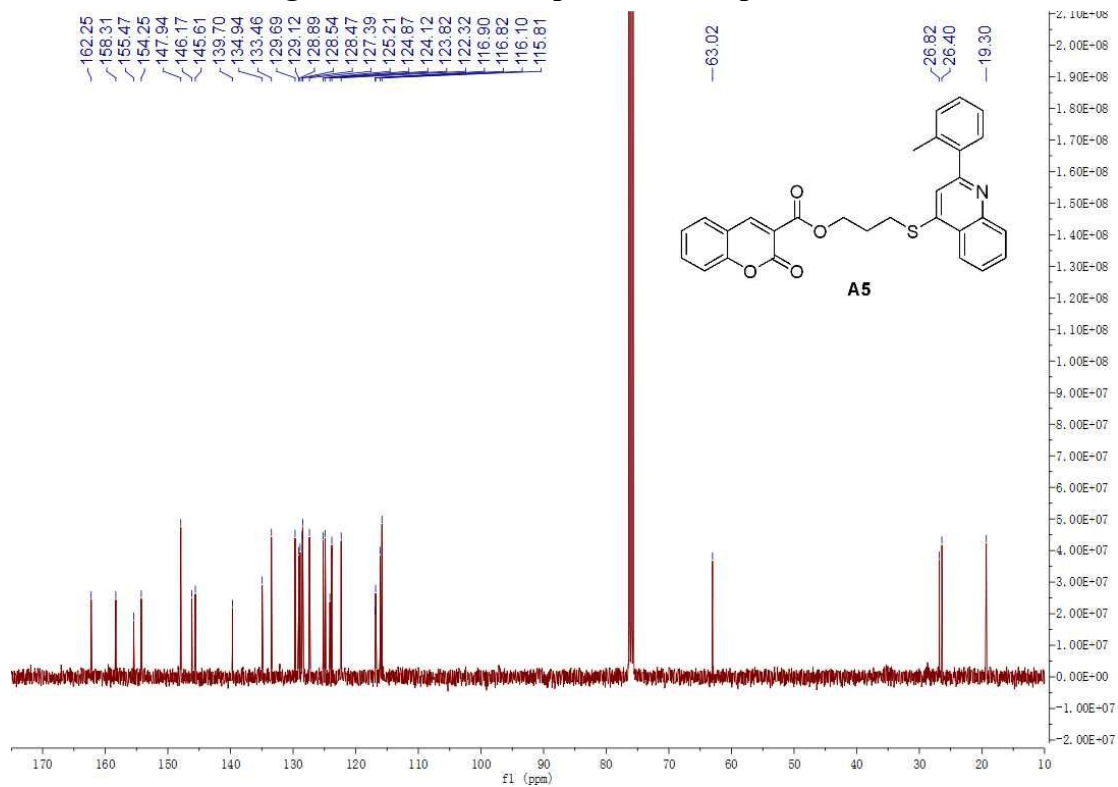

**Figure S52 <sup>13</sup>C NMR spectra of compound A5**

Item name: ZYQ-A5  
Item description:

Channel name: 1: Average Time 0.1334 min : TOF MS (50-1500) ESI+ : Centroided : Combined

7.97e6

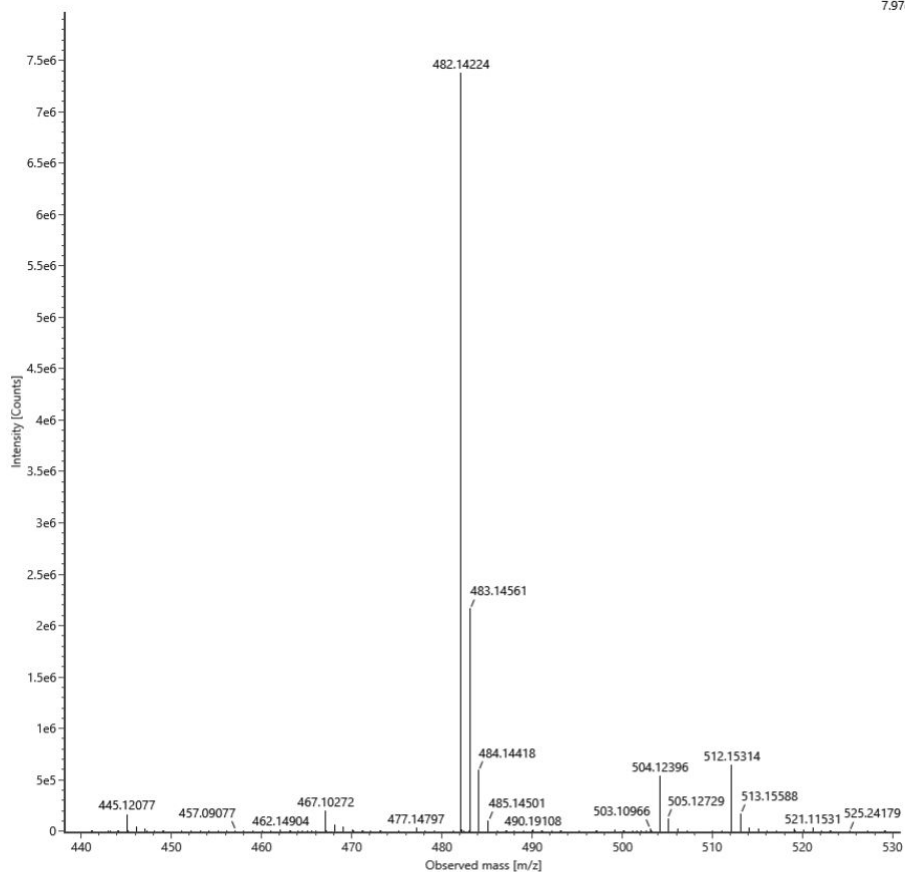

Figure S53 HRMS spectra of compound A5

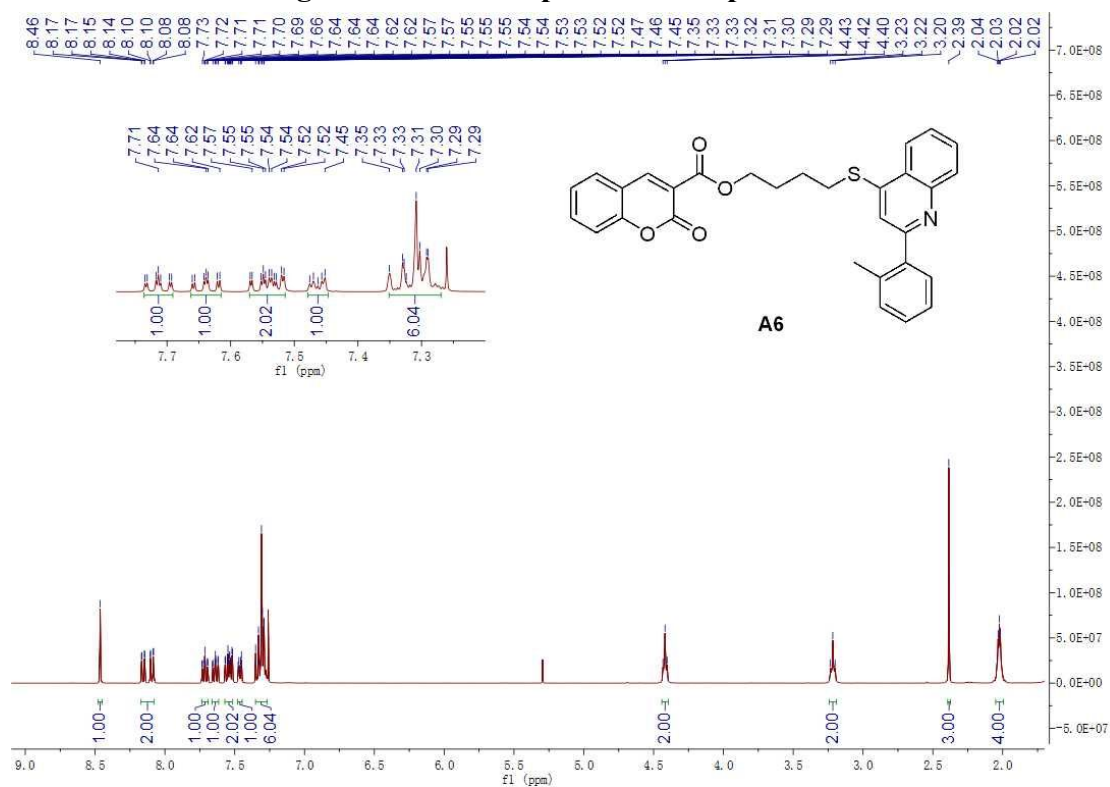

Figure S54 <sup>1</sup>H NMR spectra of compound A6

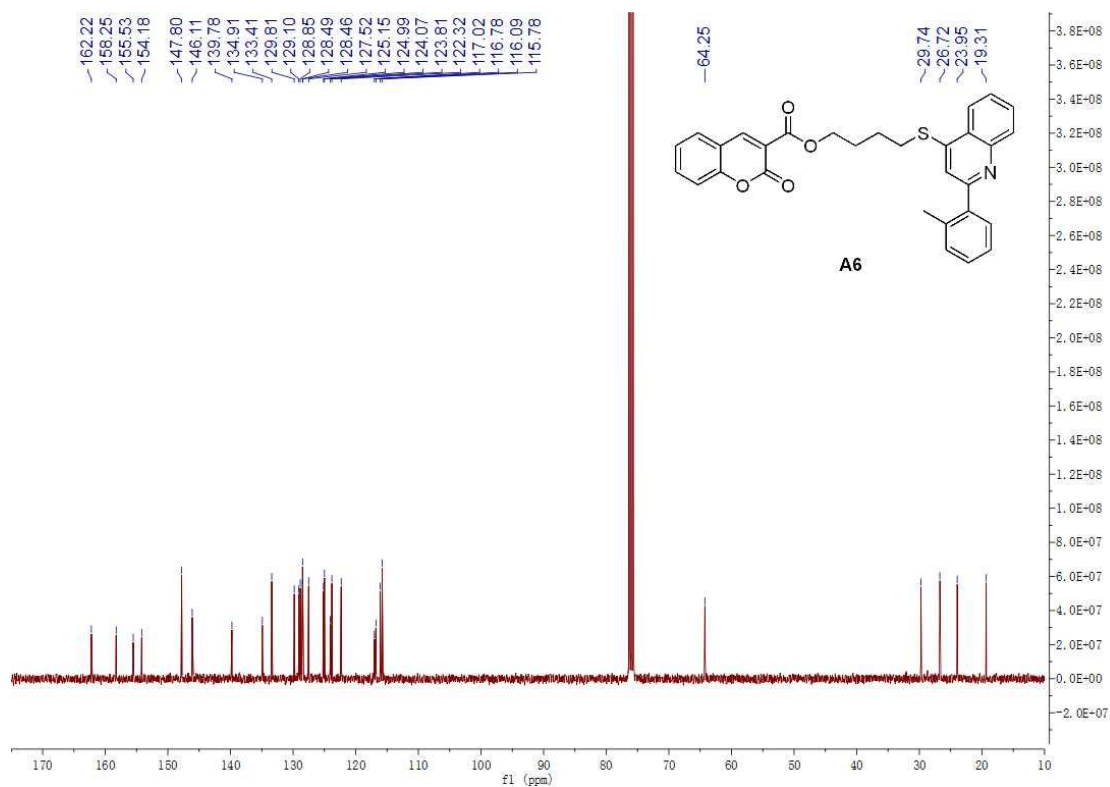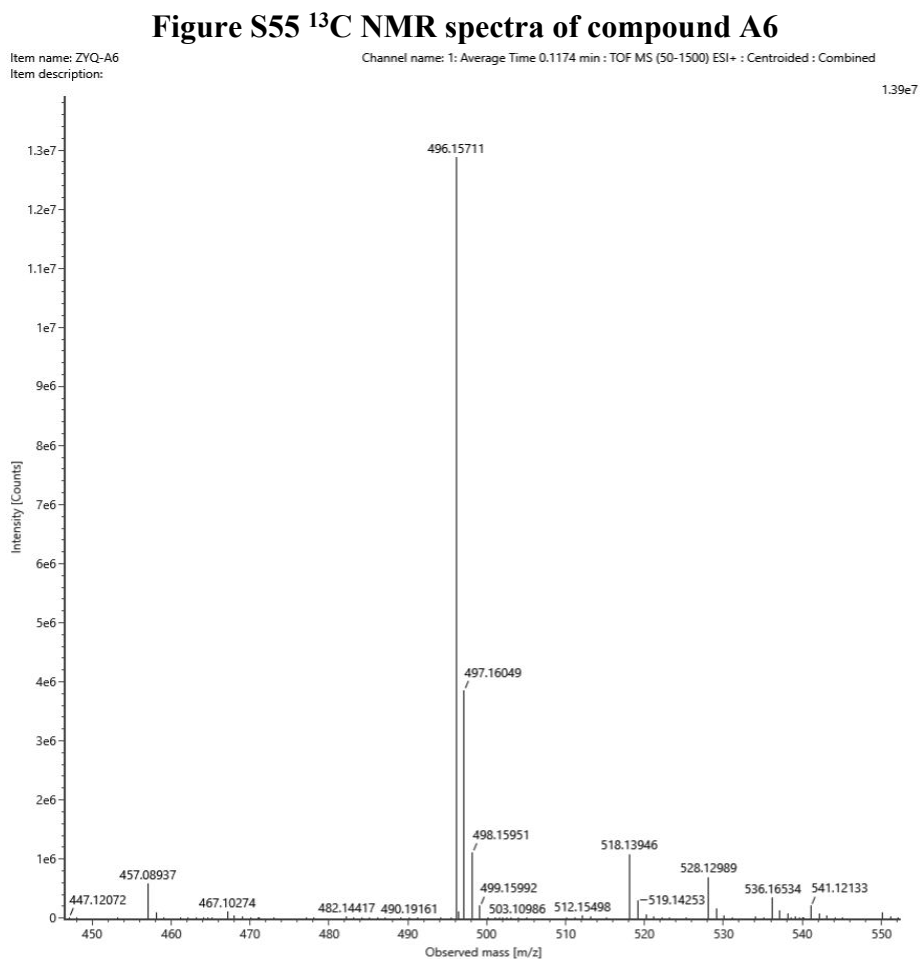

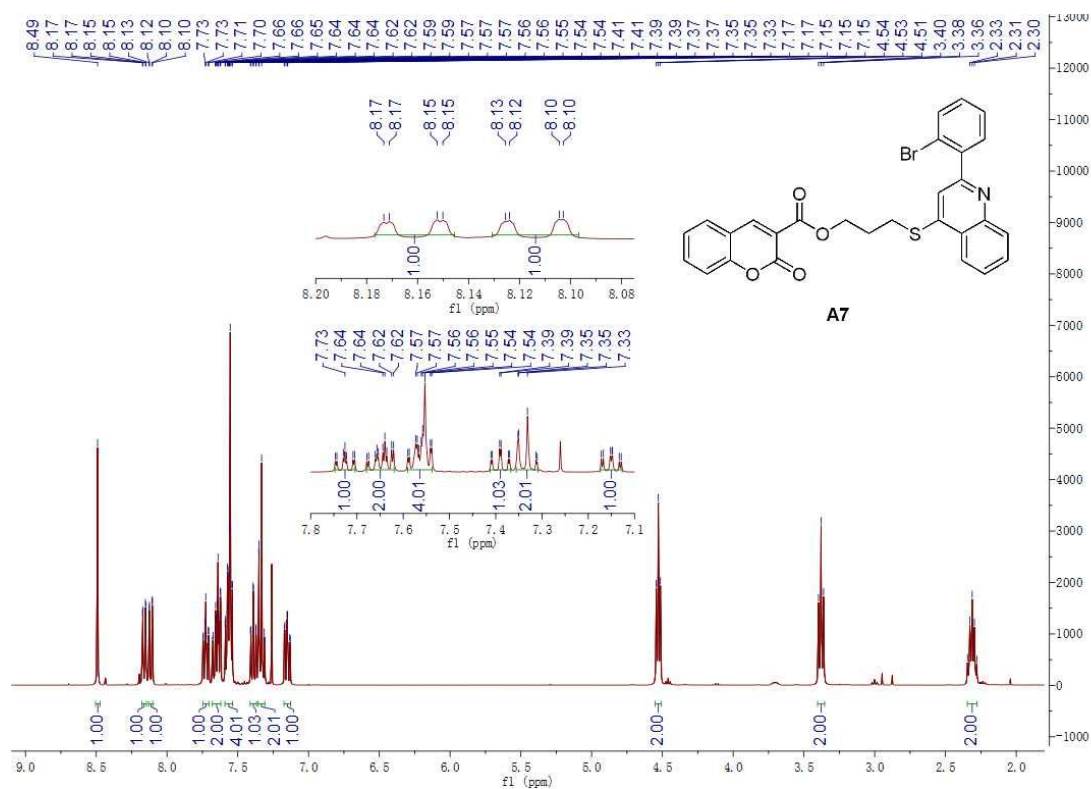

**Figure S57  $^1\text{H}$  NMR spectra of compound A7**

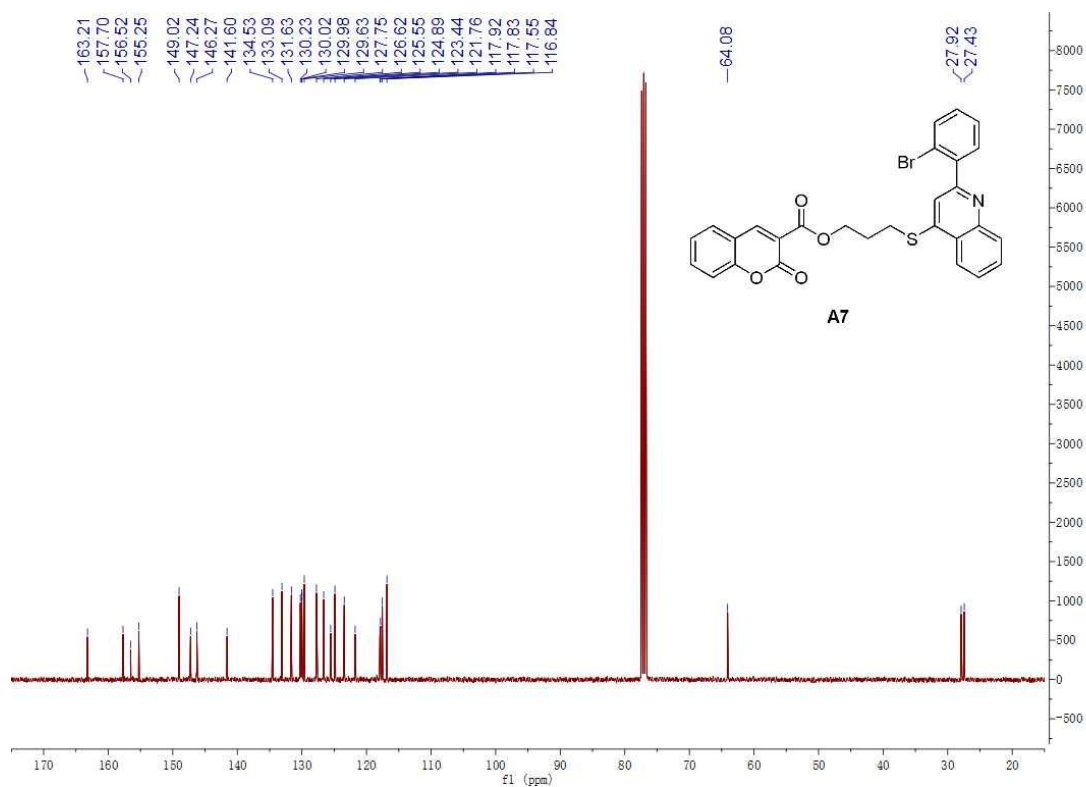

**Figure S58  $^{13}\text{C}$  NMR spectra of compound A7**

Item name: ZYQ-A7  
Item description:

Channel name: 1: Average Time 0.1174 min : TOF MS (50-1500) ESI+ : Centroided : Combined

7.55e6

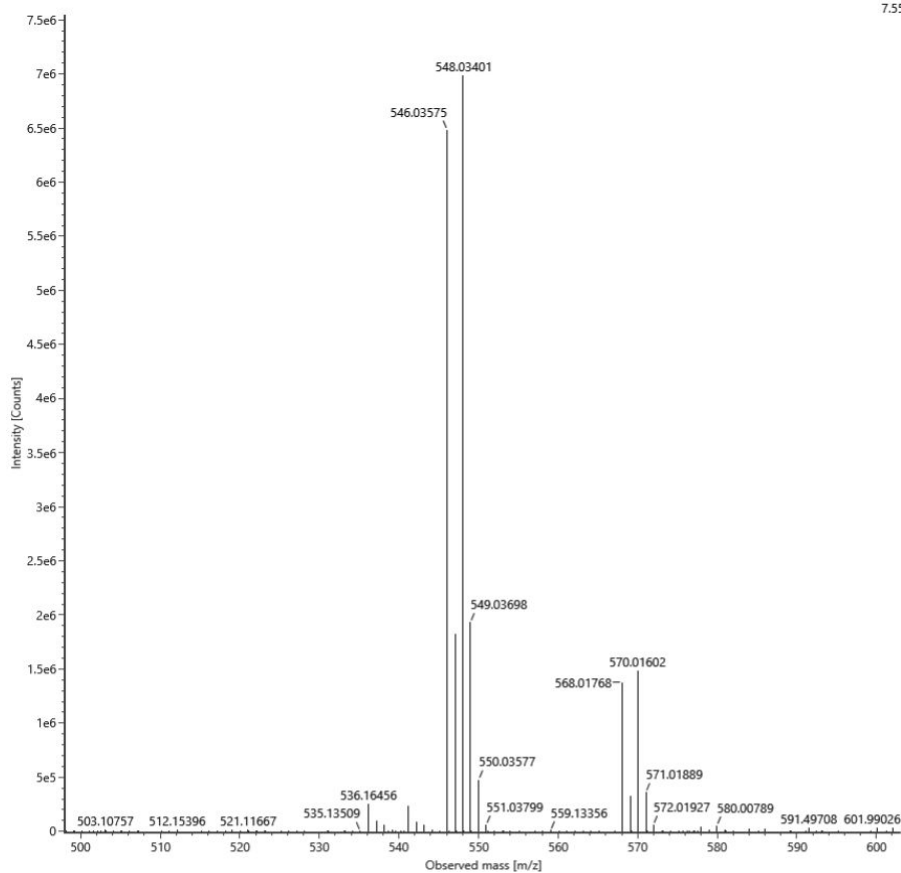

Figure S59 HRMS spectra of compound A7

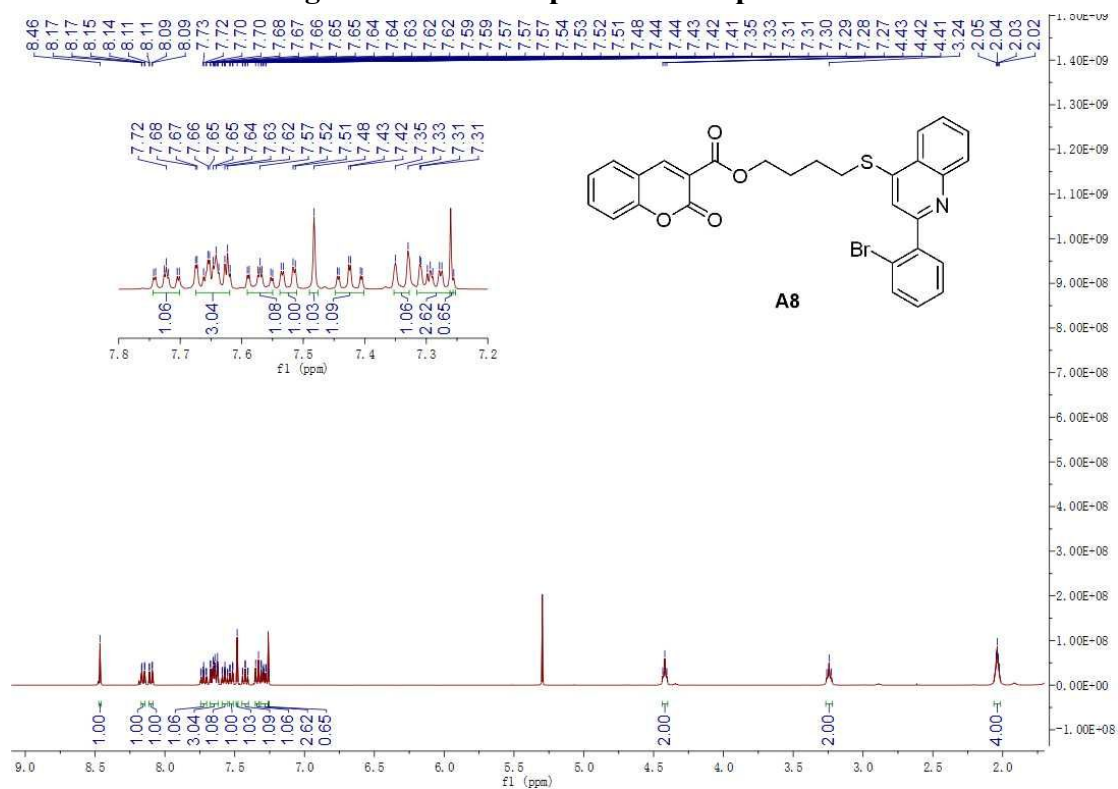

Figure S60 <sup>1</sup>H NMR spectra of compound A8

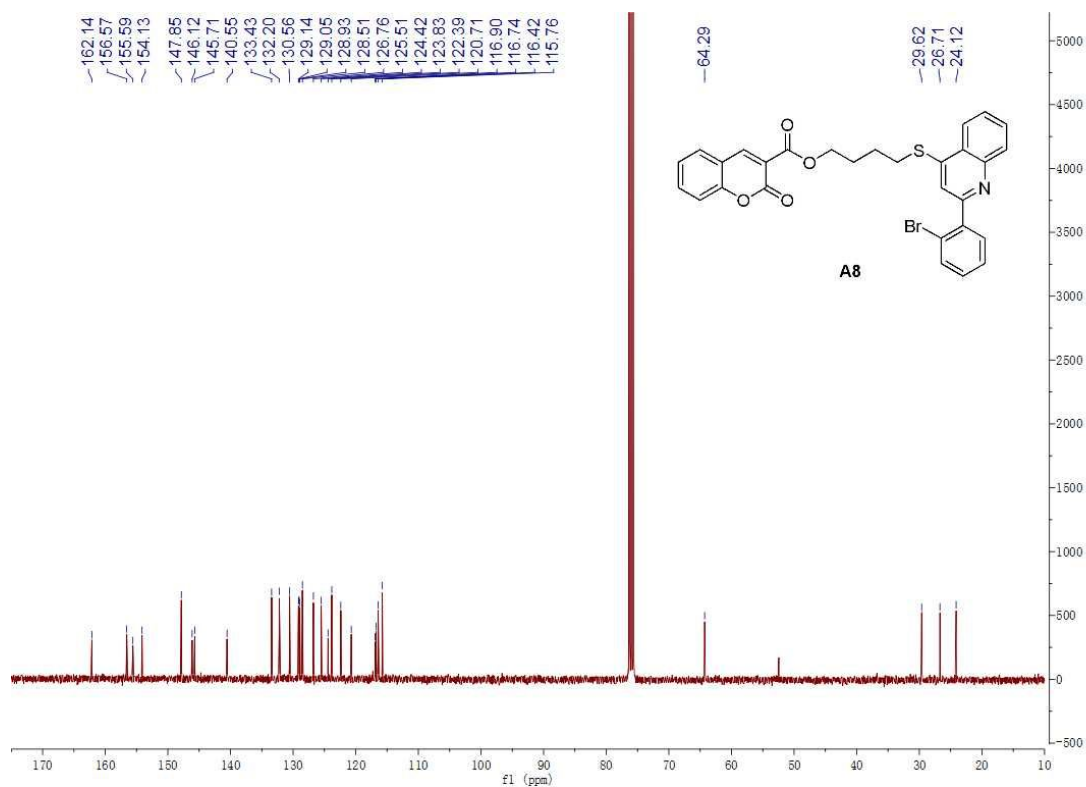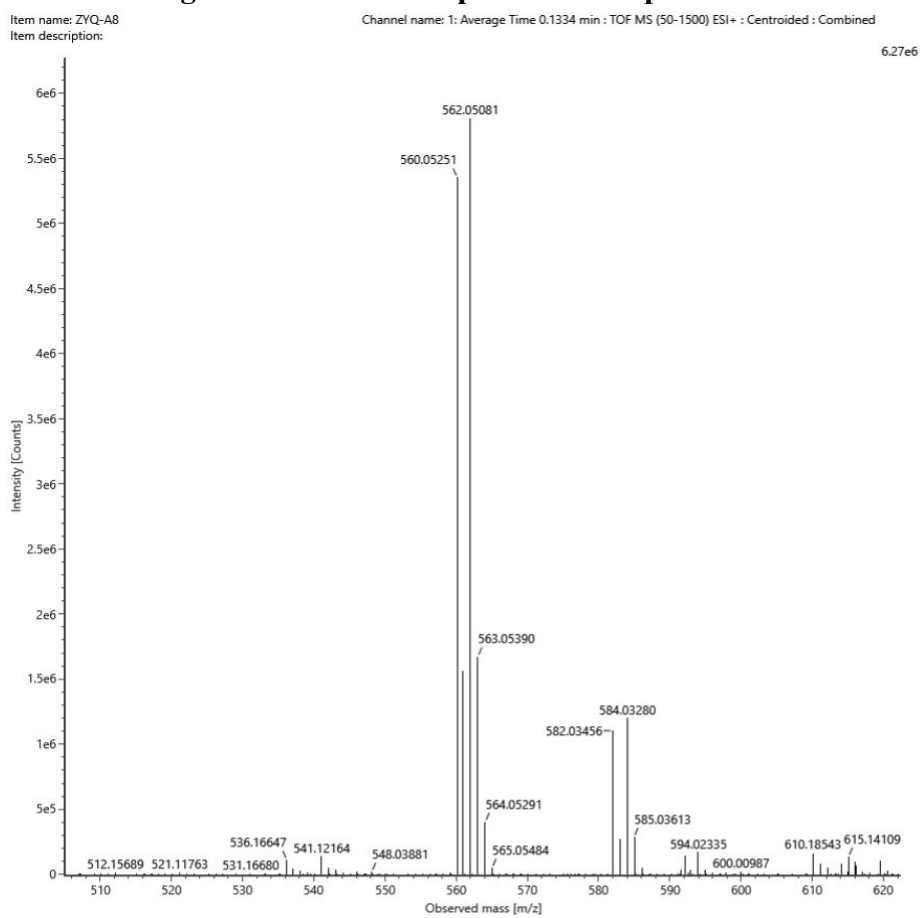



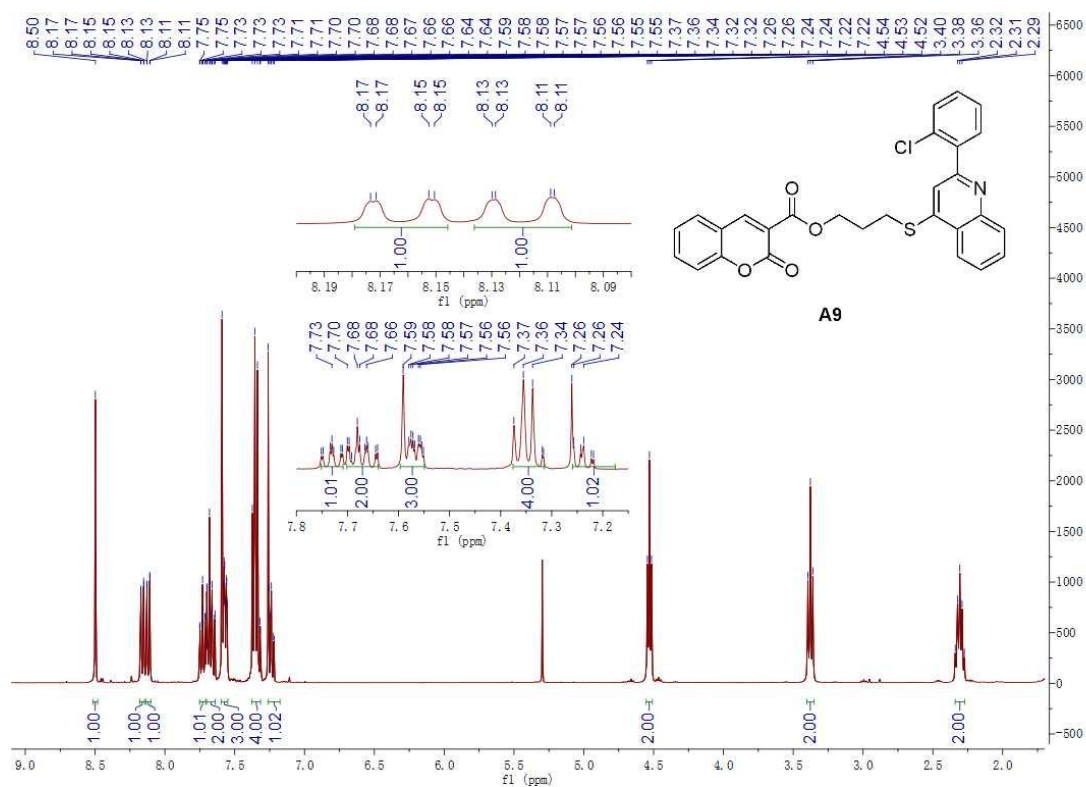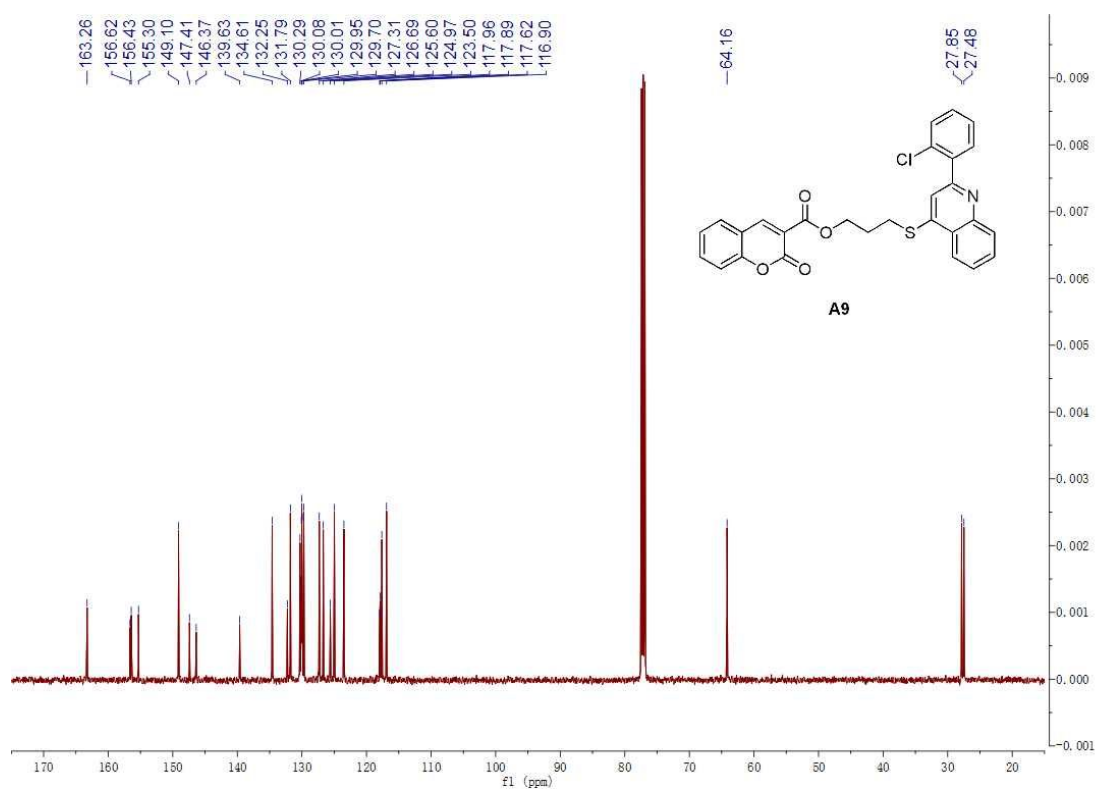

Item name: ZYQ-A9  
Item description:

Channel name: 1: Average Time 0.1217 min : TOF MS (50-1500) ESI+ : Centroided : Combined

1.44e7

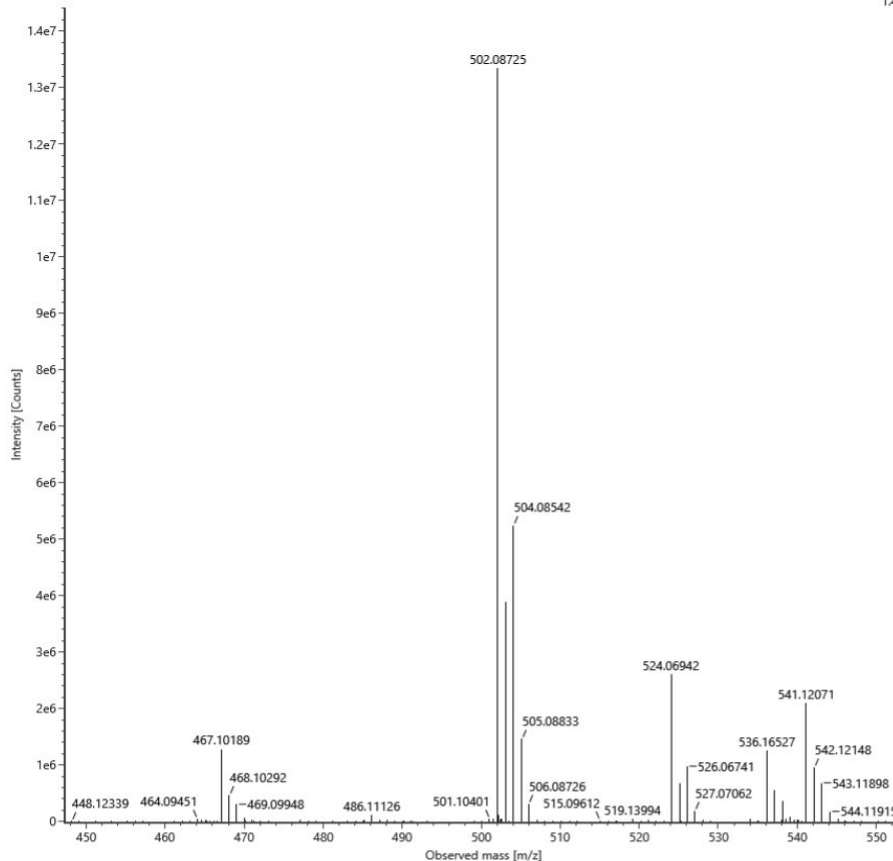

Figure S65 HRMS spectra of compound A9

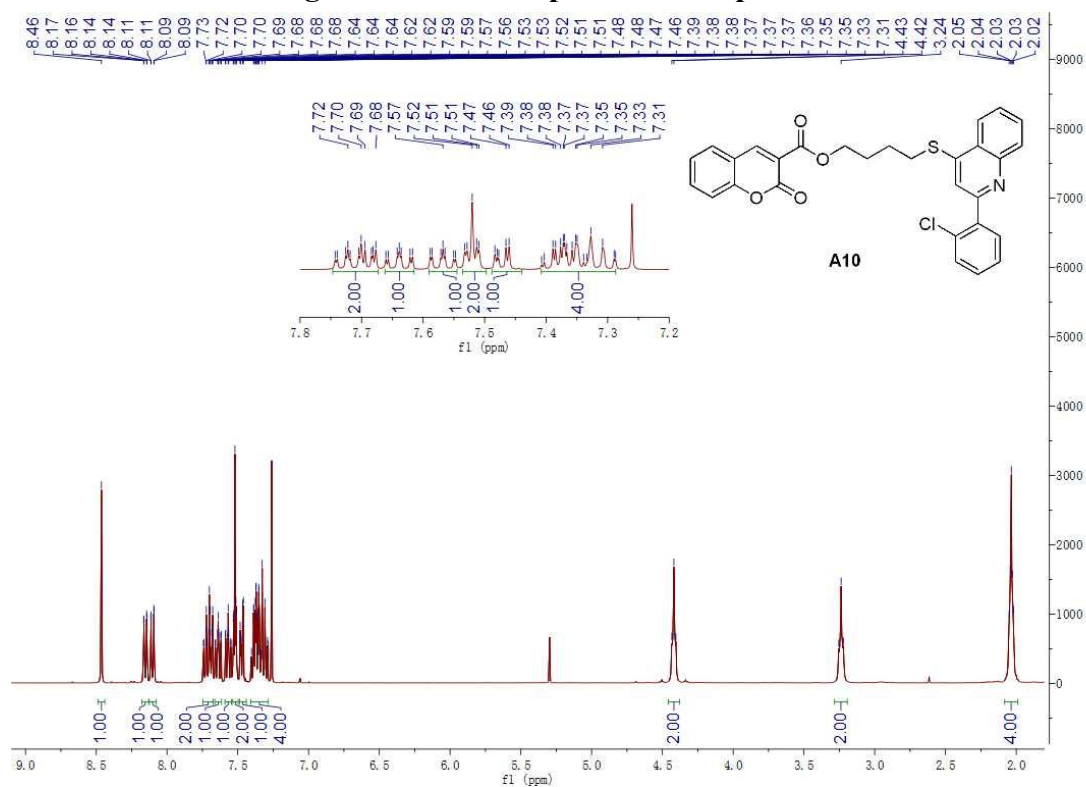

Figure S66 <sup>1</sup>H NMR spectra of compound A10

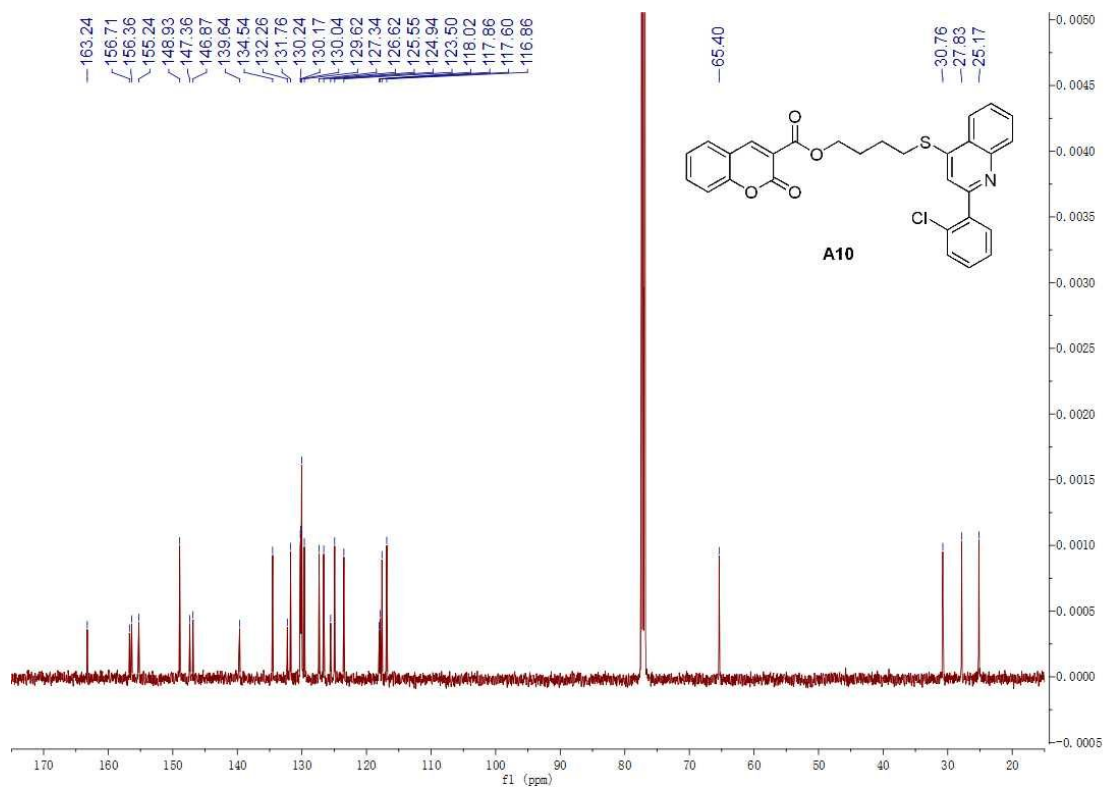

**Figure S67 <sup>13</sup>C NMR spectra of compound A10**

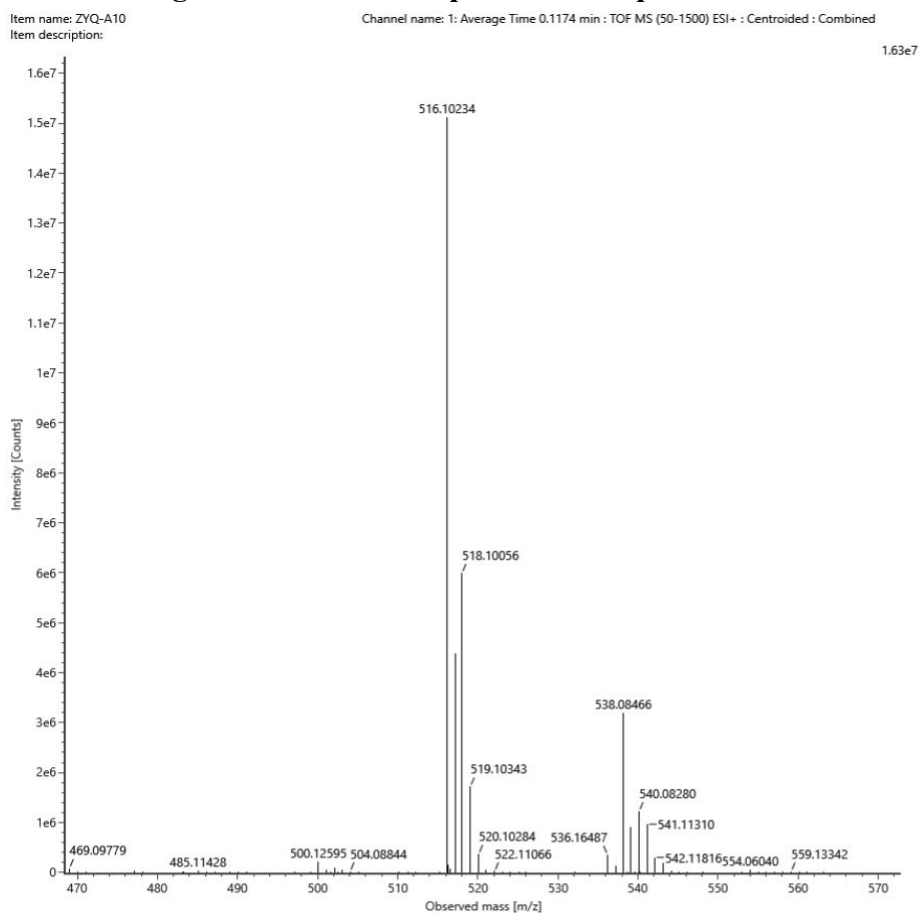

**Figure S68 HRMS spectra of compound A10**

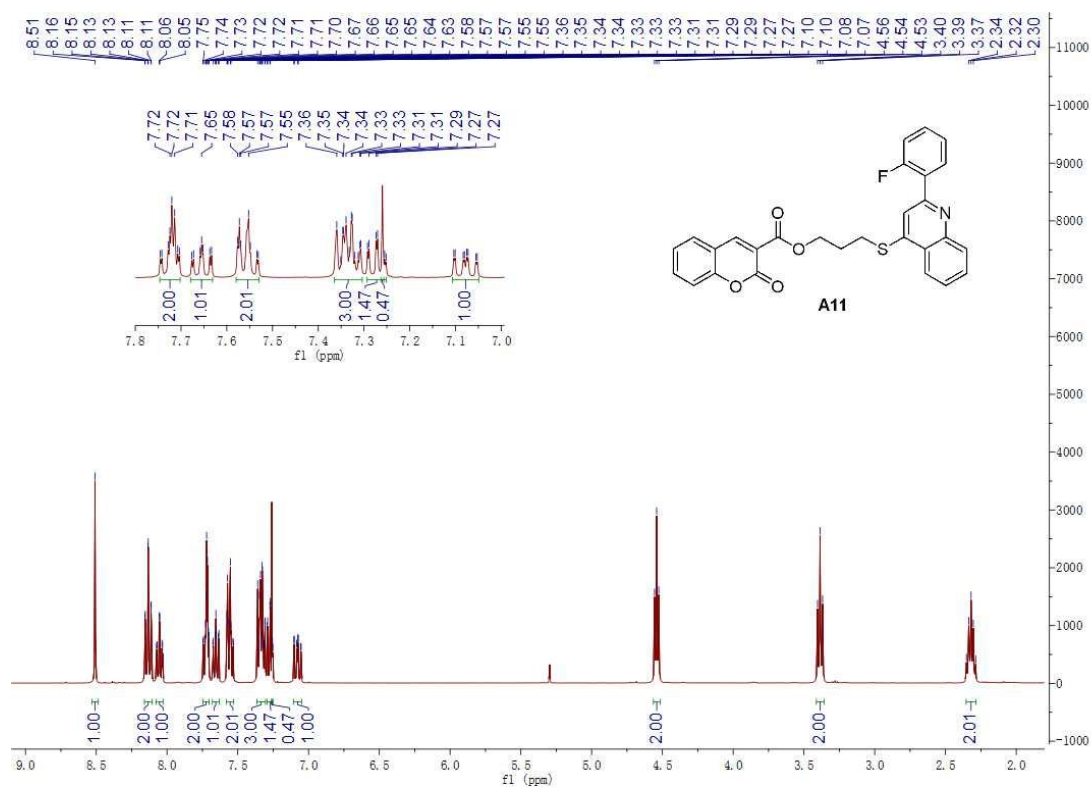

**Figure S69**  $^1\text{H}$  NMR spectra of compound A11

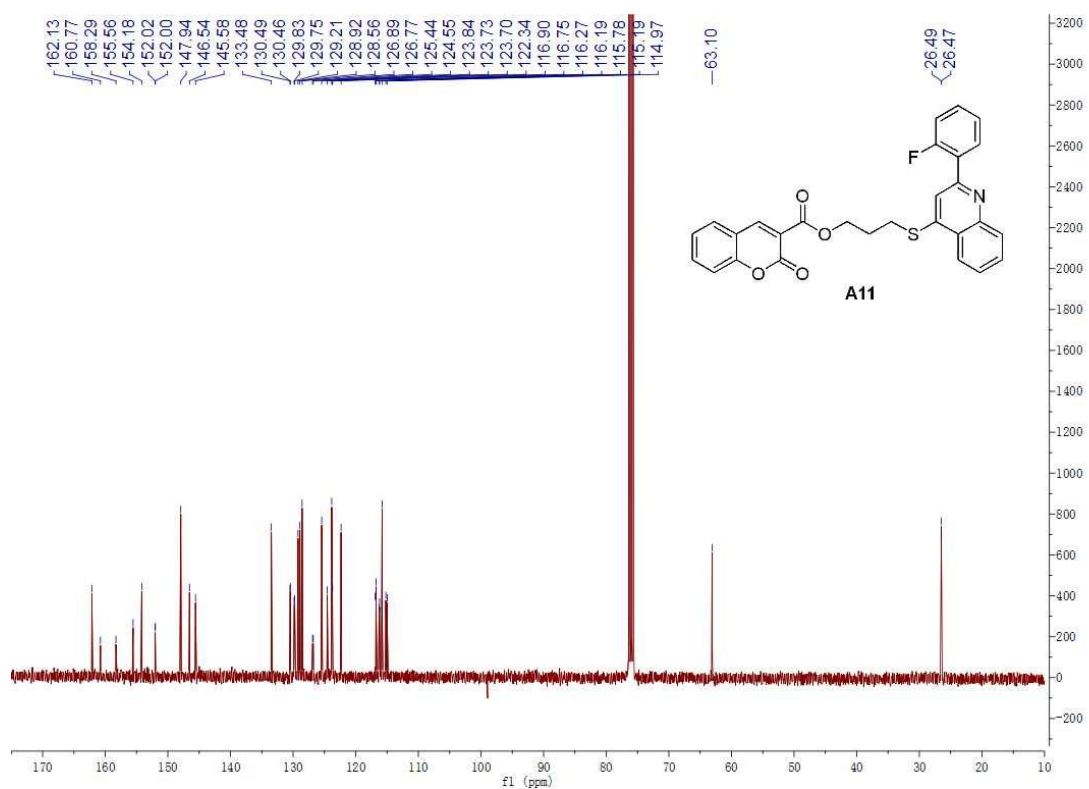

**Figure S70**  $^{13}\text{C}$  NMR spectra of compound A11

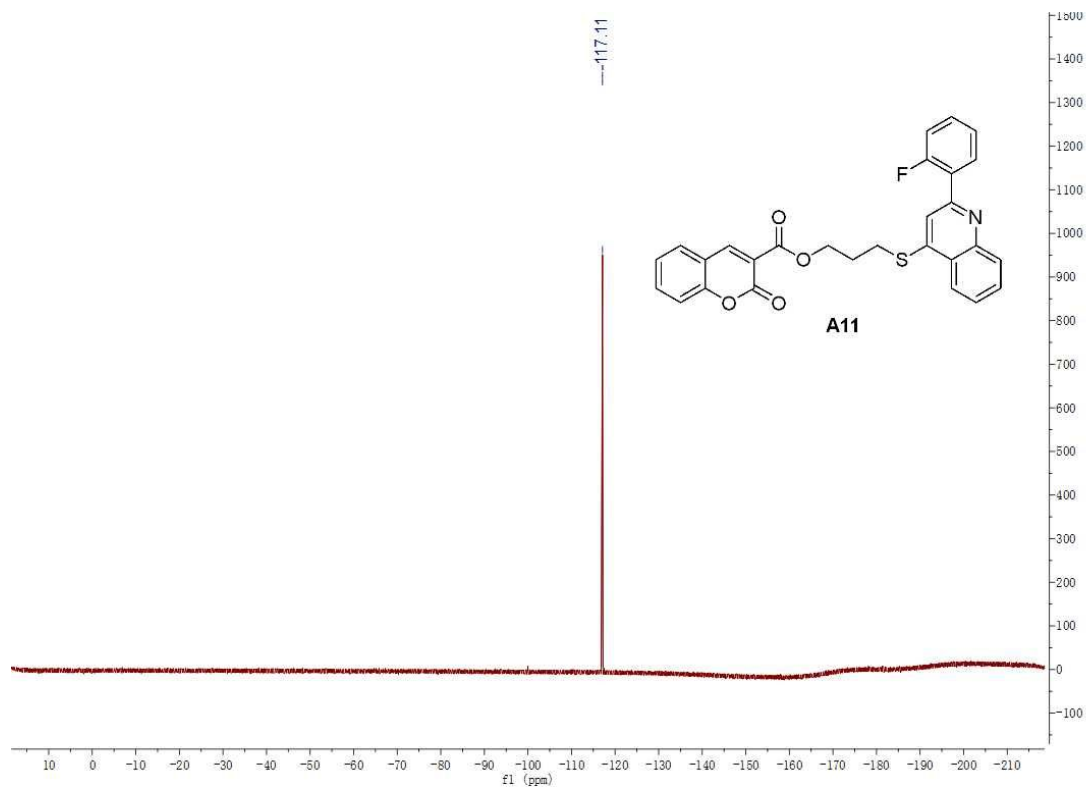

**Figure S71 <sup>19</sup>F NMR spectra of compound A11**

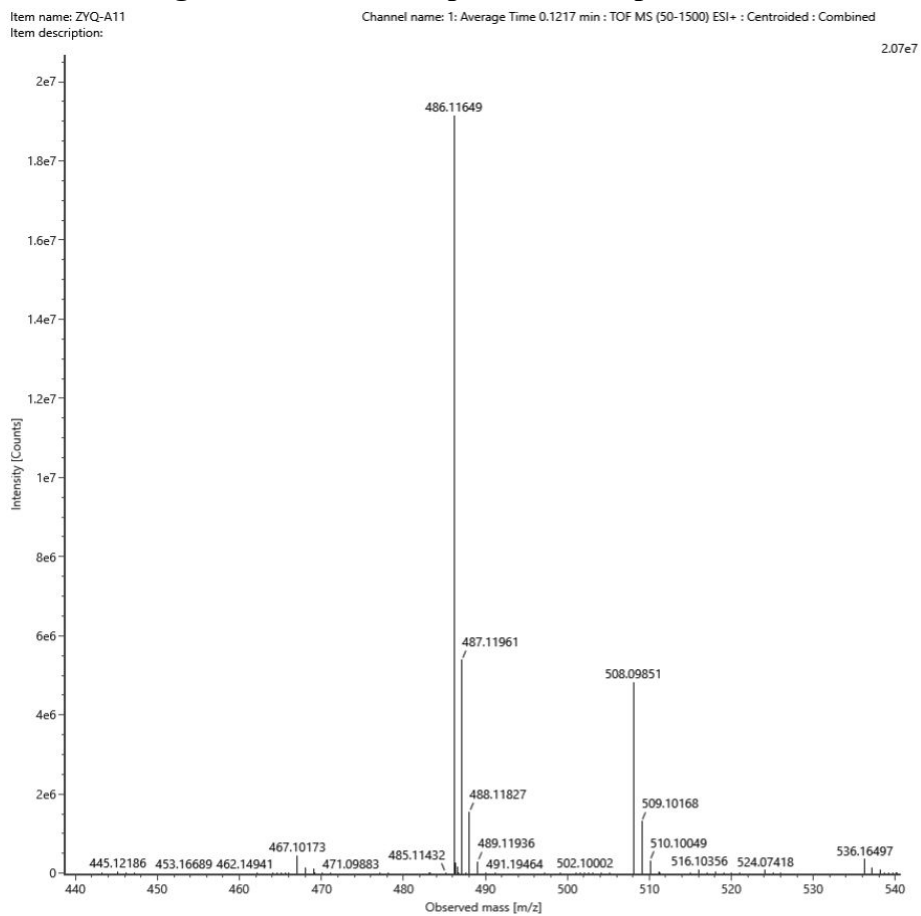

**Figure S72 HRMS spectra of compound A11**

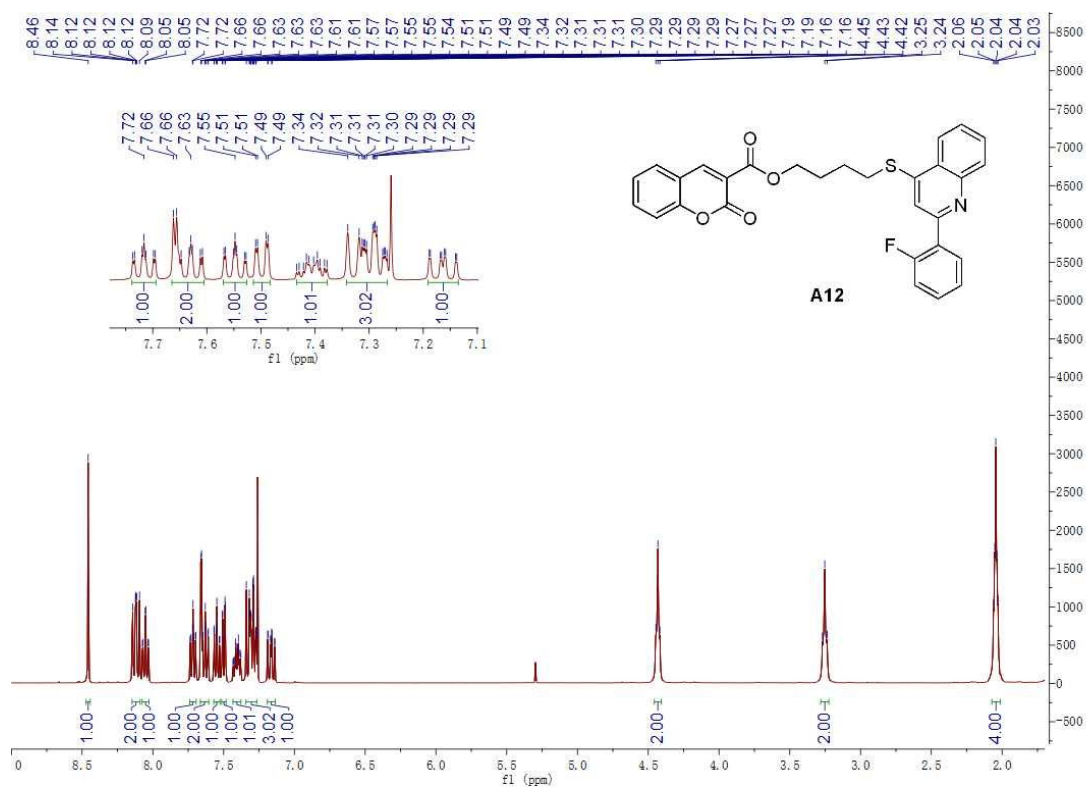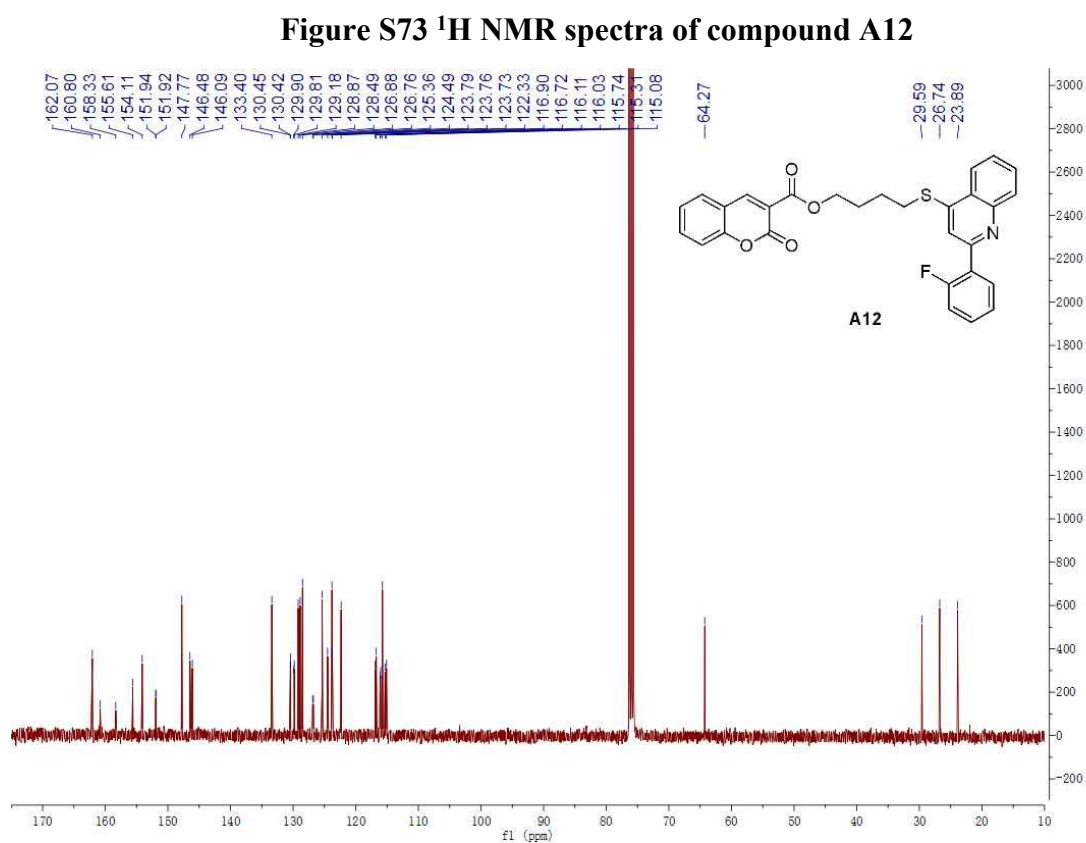

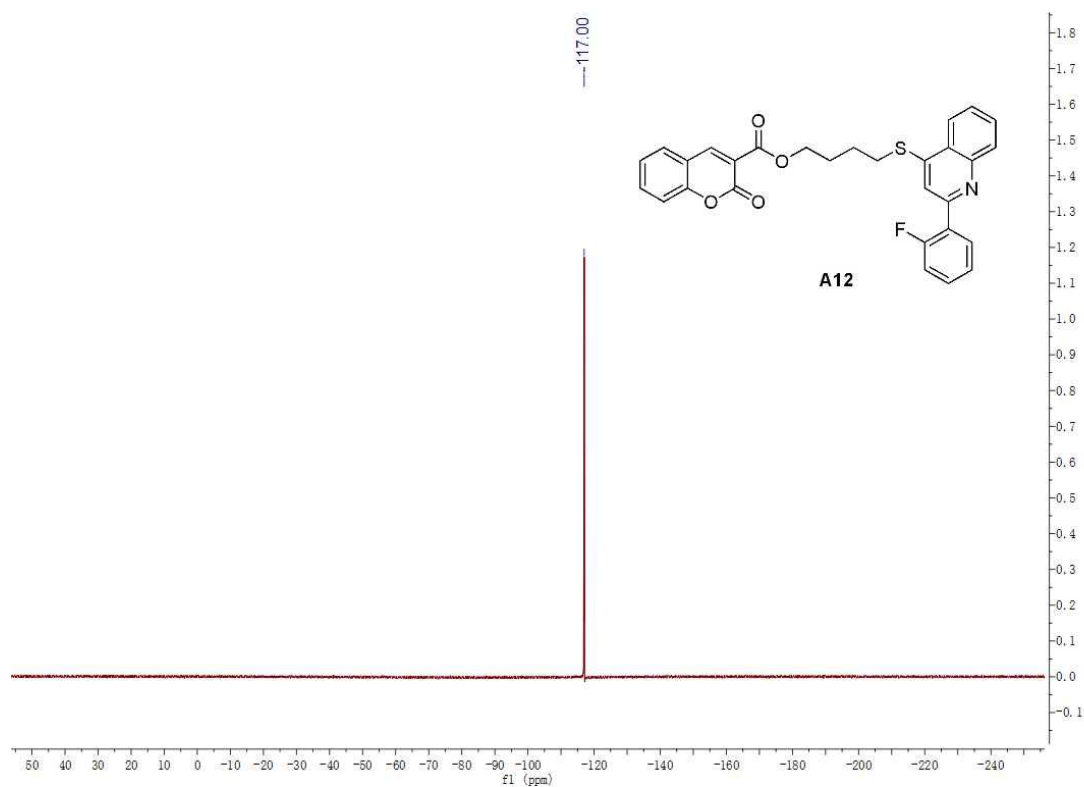

**Figure S75 <sup>19</sup>F NMR spectra of compound A12**

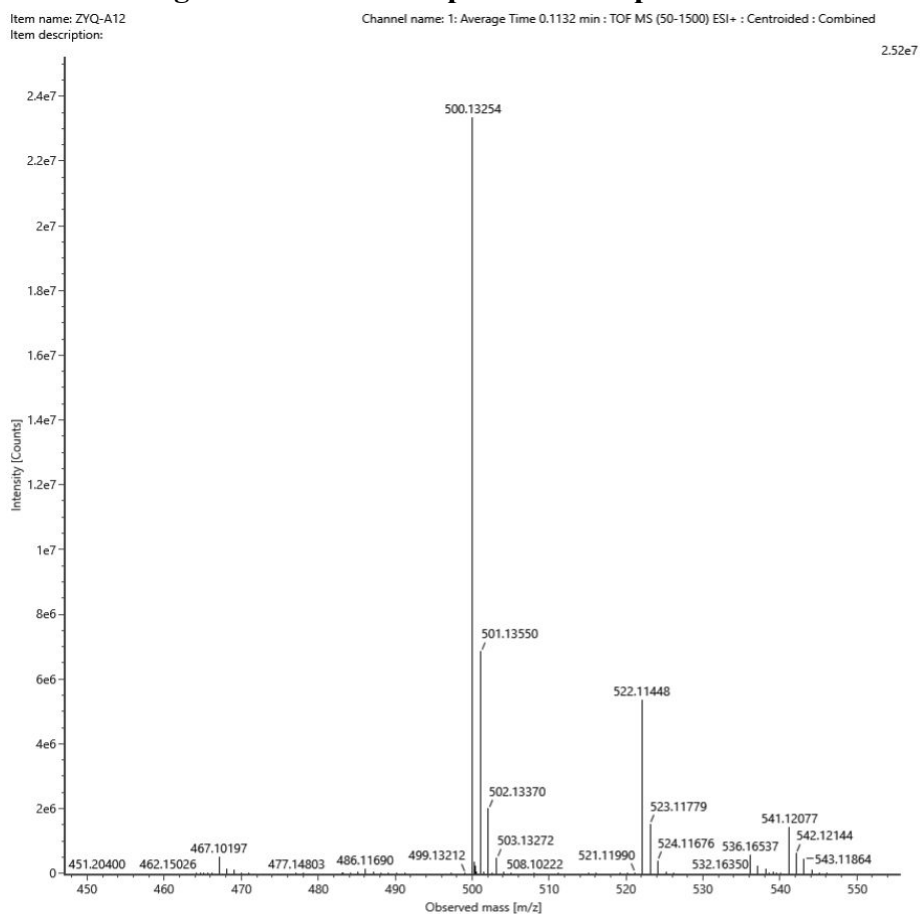

**Figure S76 HRMS spectra of compound A12**

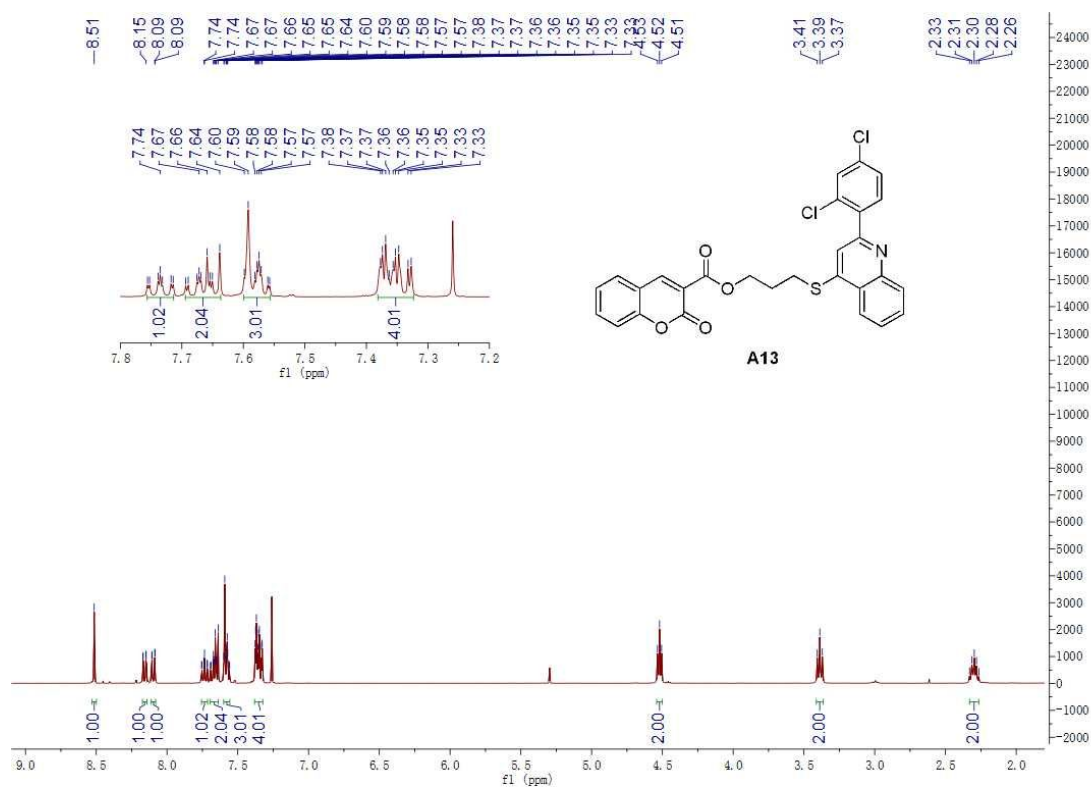

**Figure S77 <sup>1</sup>H NMR spectra of compound A13**

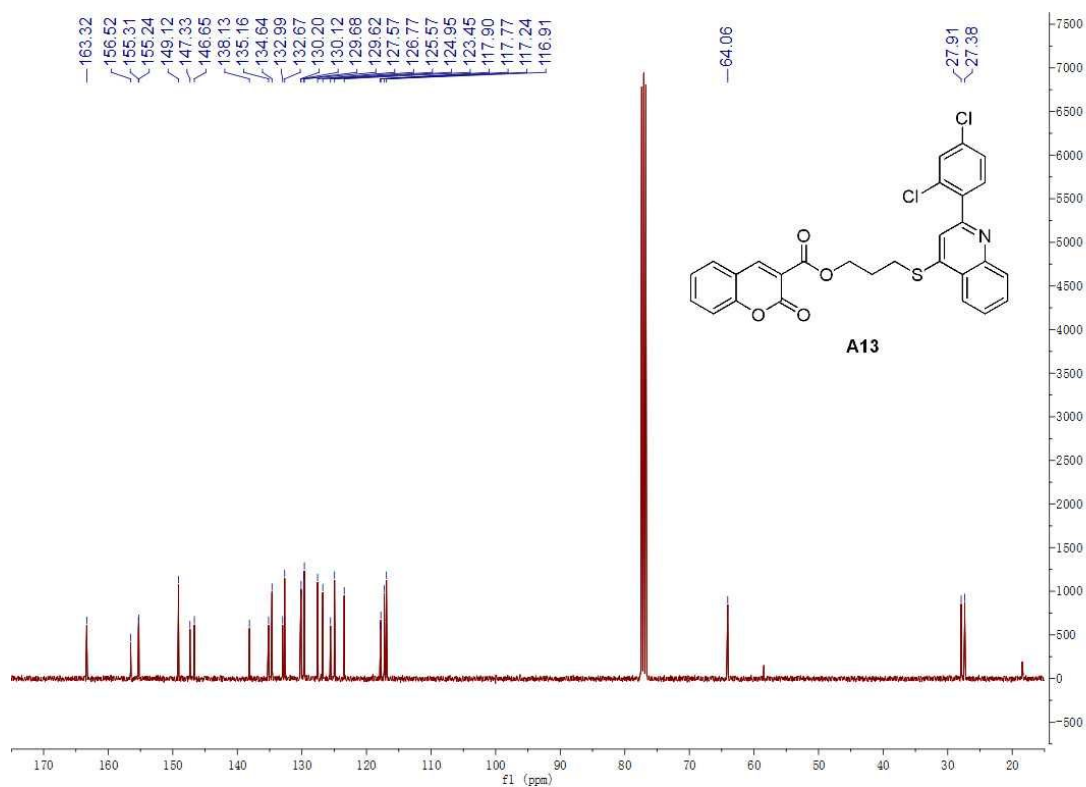

**Figure S78 <sup>13</sup>C NMR spectra of compound A13**



Item name: ZYQ-A39  
Item description:

Channel name: 1: Average Time 0.1174 min : TOF MS (50-1500) ESI+ : Centroided : Combined

1.67e7

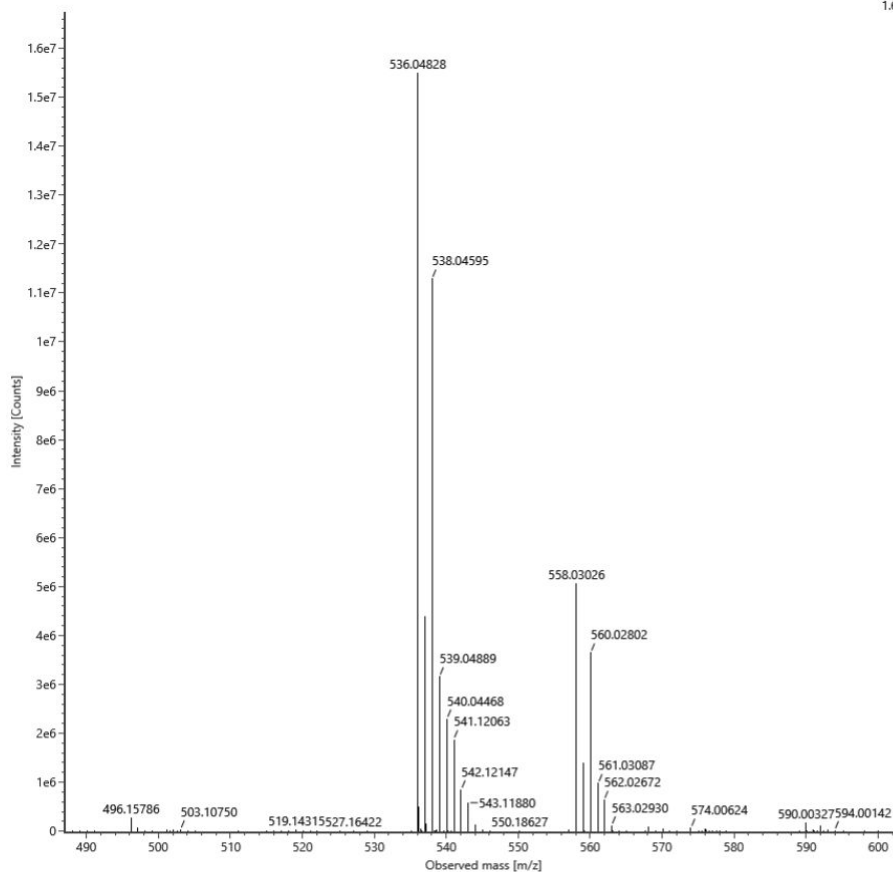

Figure S79 HRMS spectra of compound A13

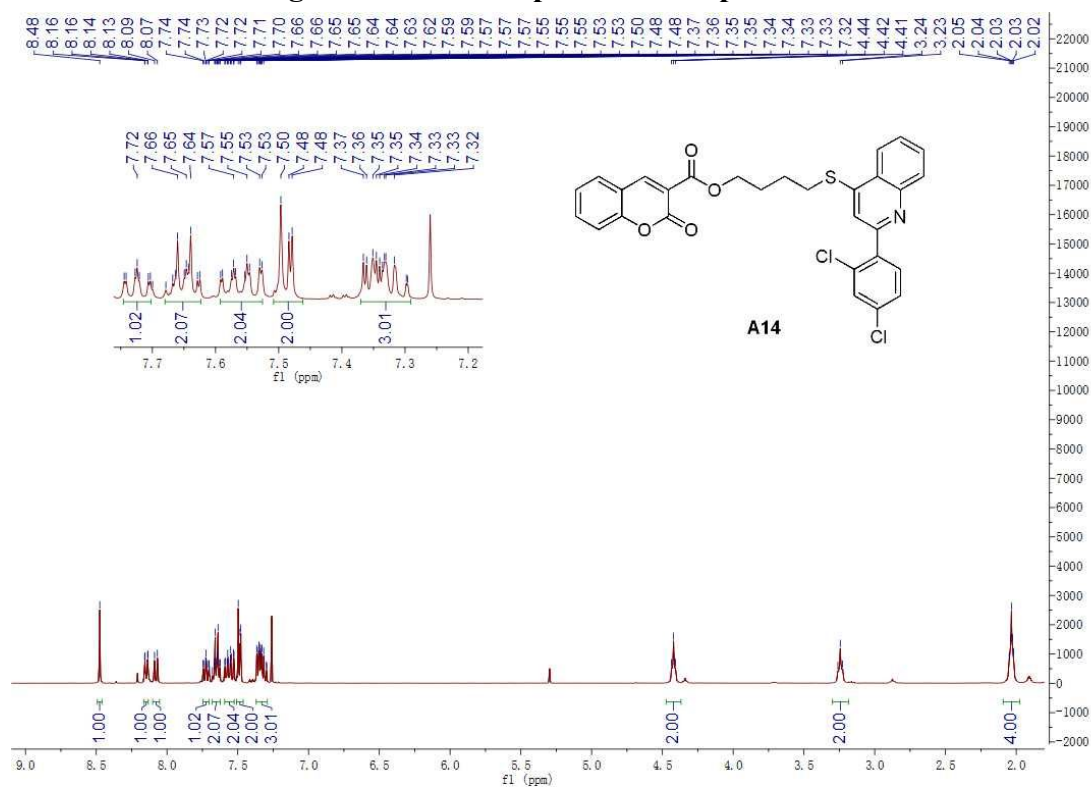

Figure S80 <sup>1</sup>H NMR spectra of compound A14

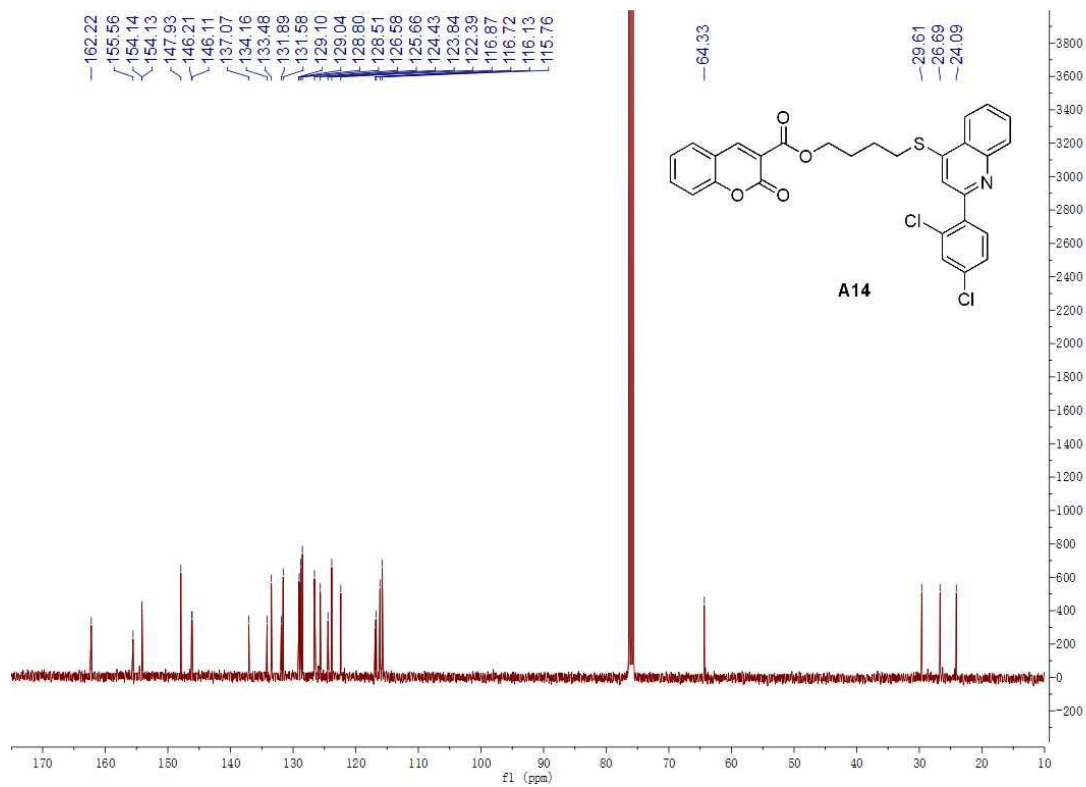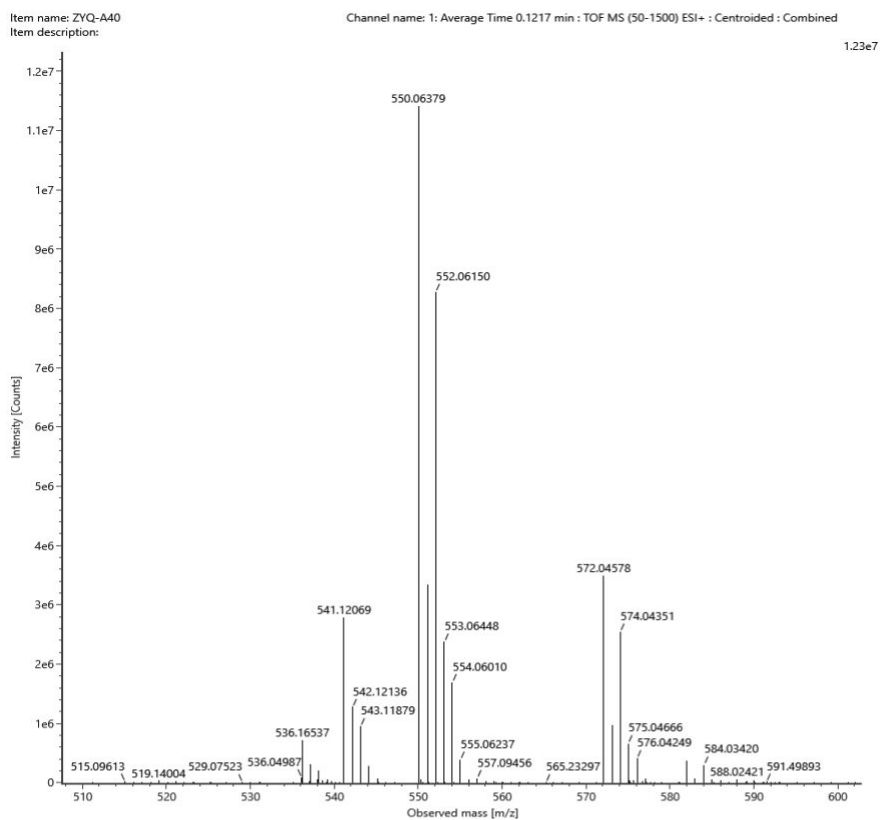

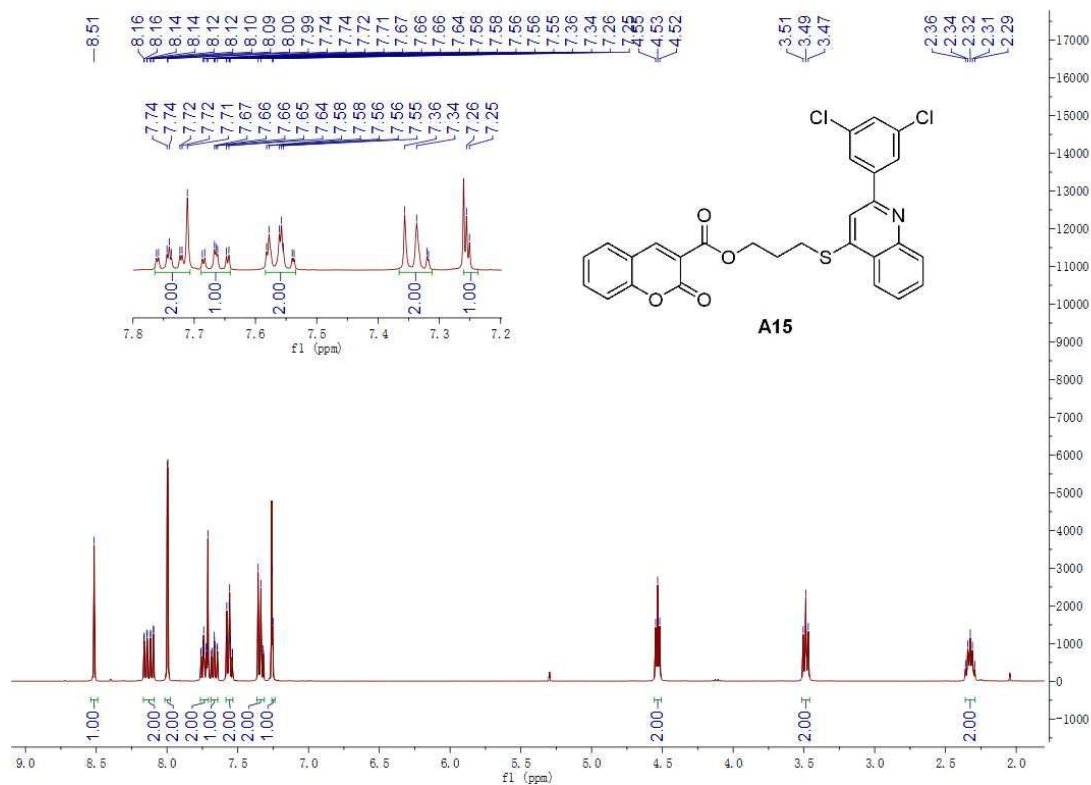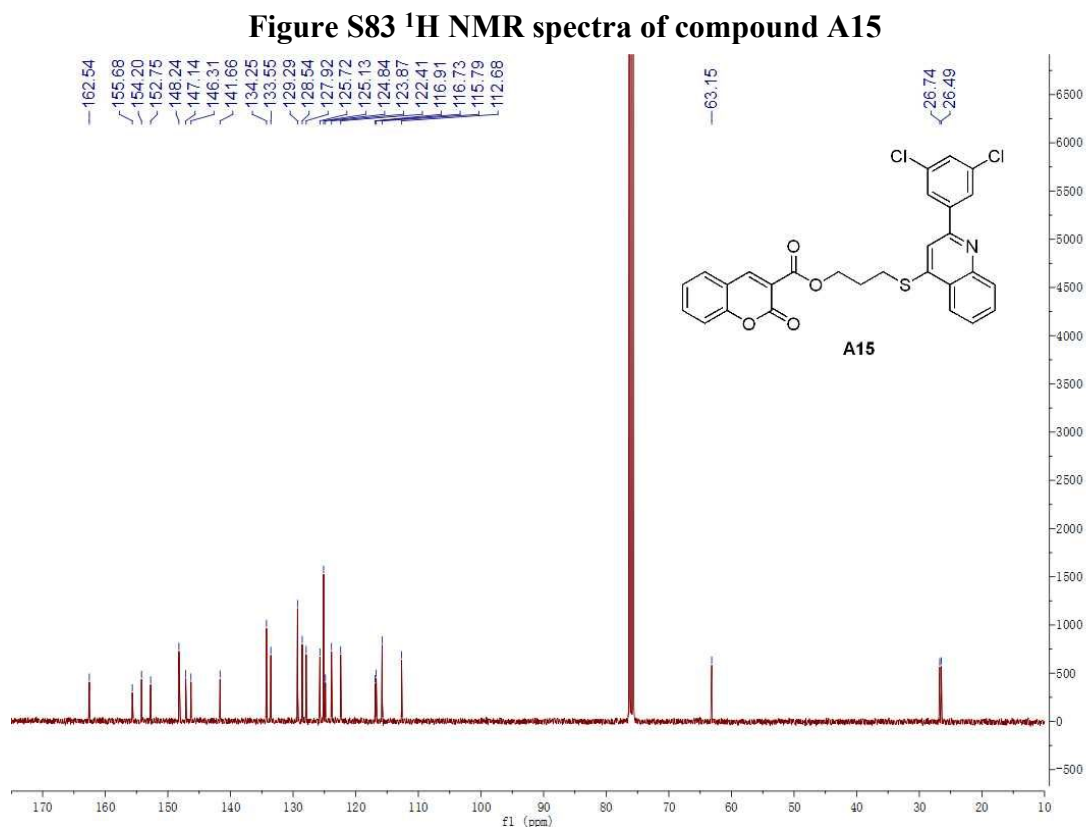

Item name: ZYQ-A41  
Item description:

Channel name: 1: Average Time 0.1377 min : TOF MS (50-1500) ESI+ : Centroided : Combined

2.03e6

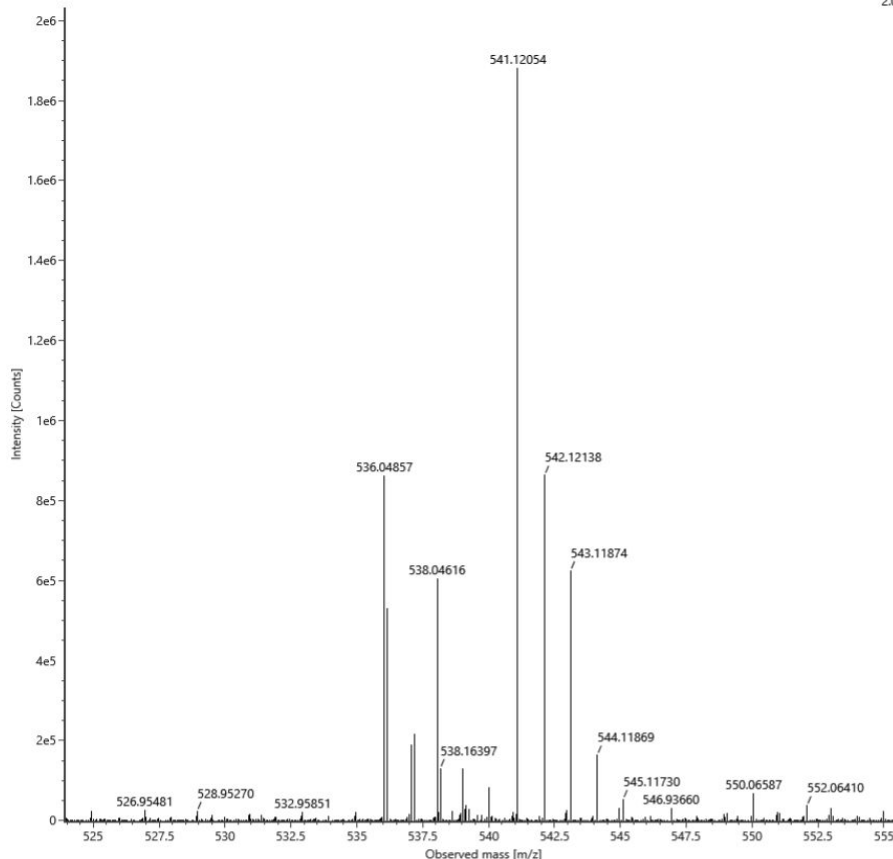

Figure S85 HRMS spectra of compound A15

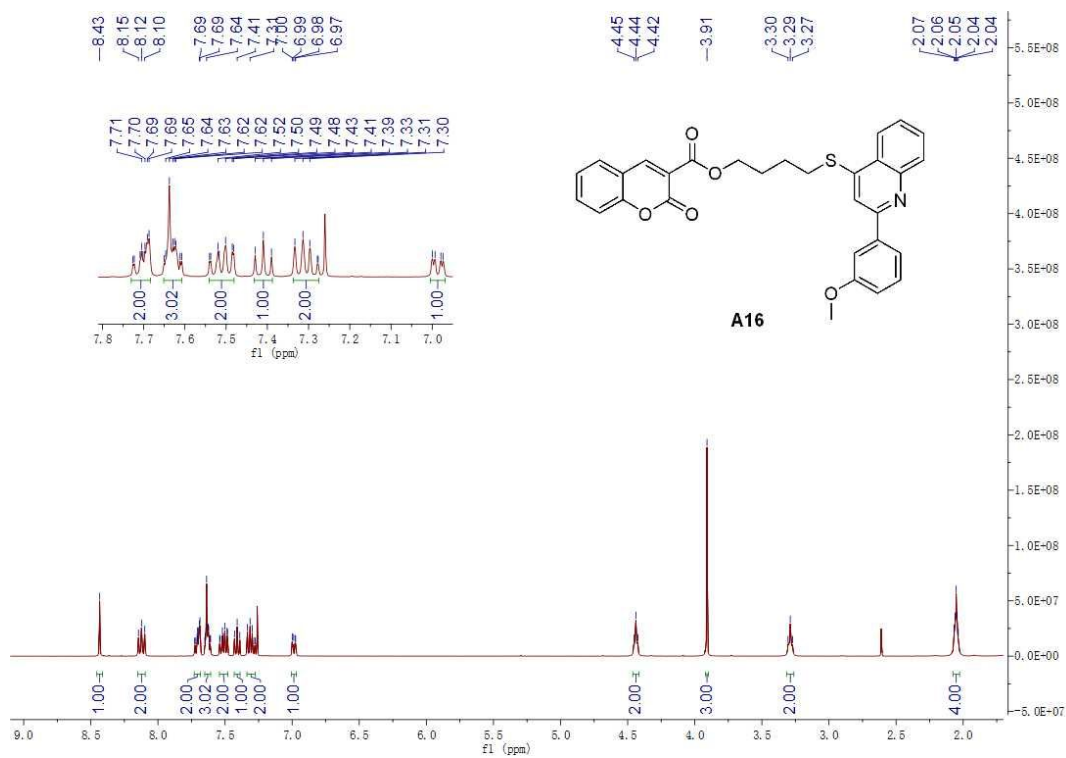

Figure S86 <sup>1</sup>H NMR spectra of compound A16

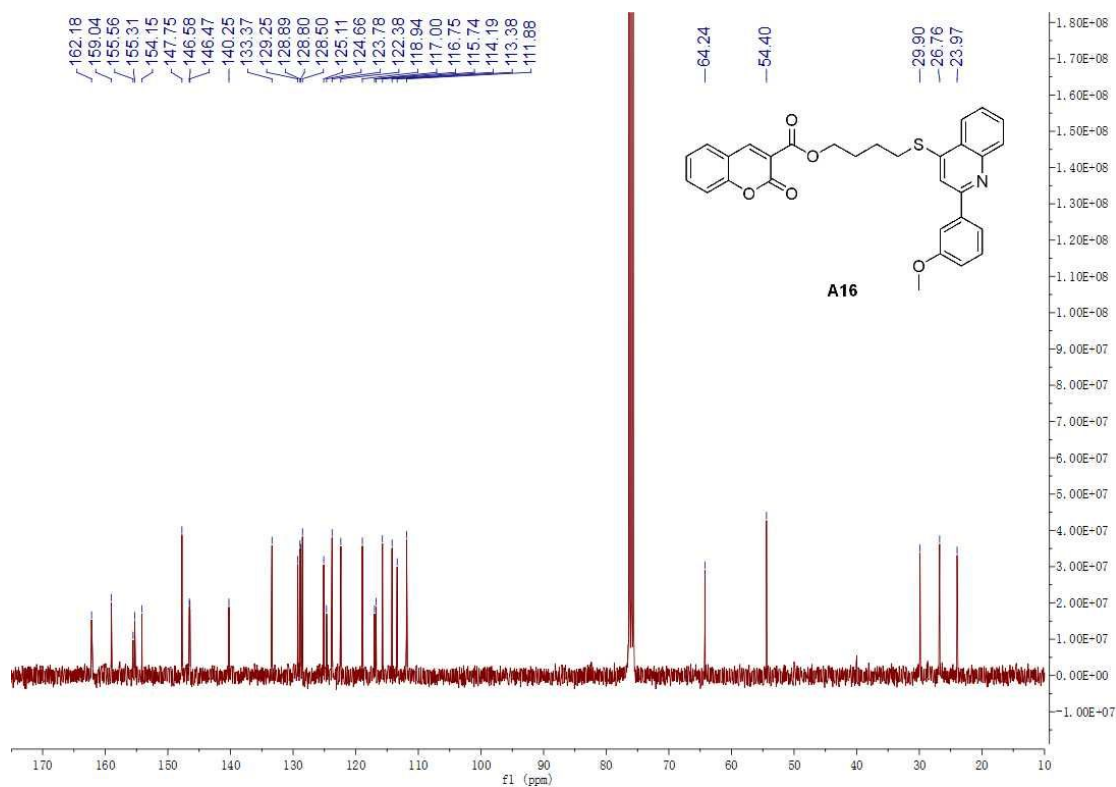

Figure S87 <sup>13</sup>C NMR spectra of compound A16

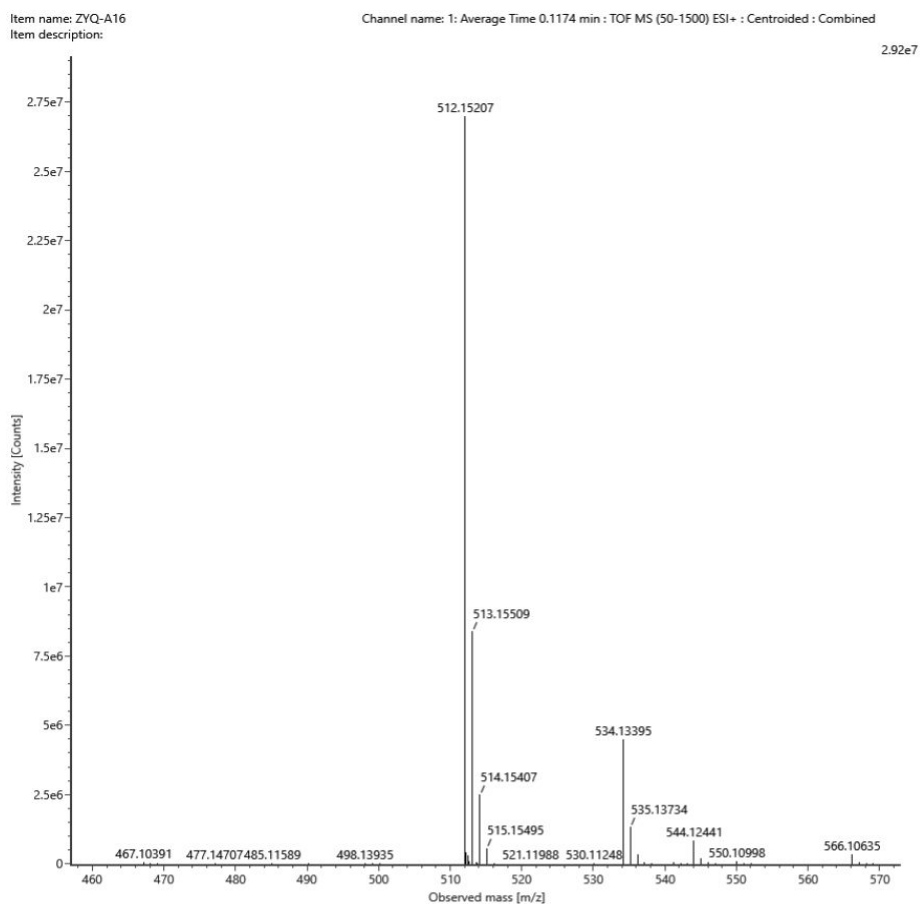

Figure S88 HRMS spectra of compound A16

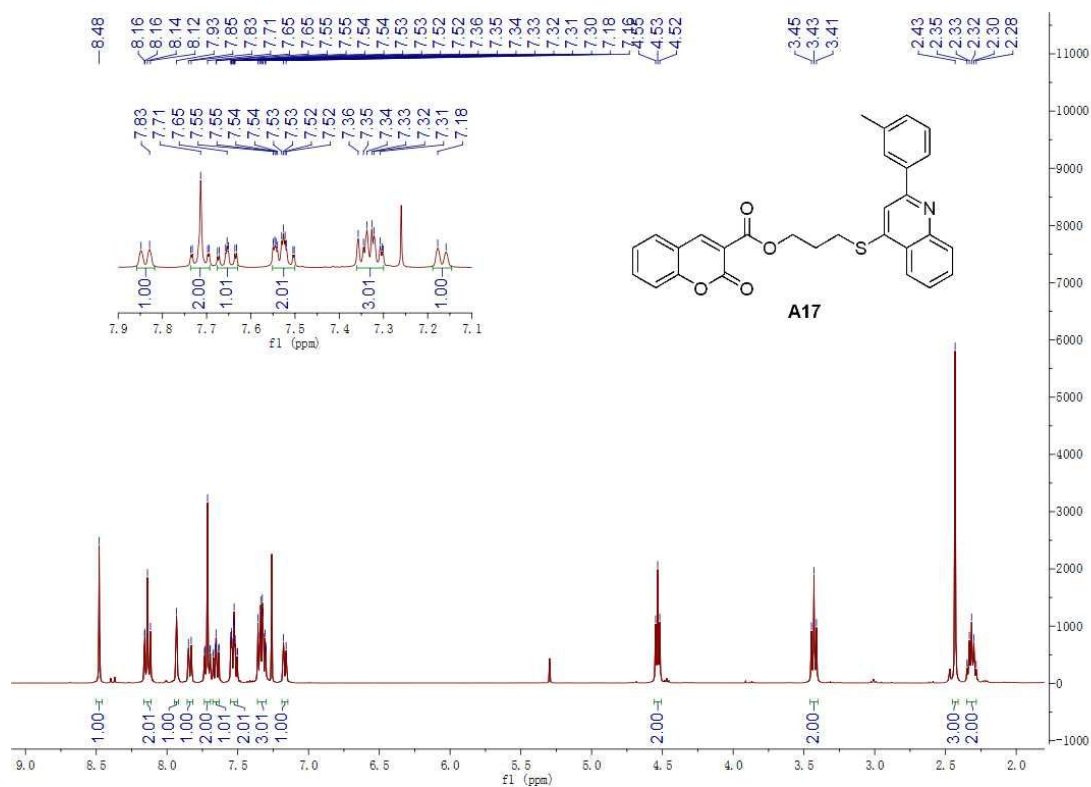

**Figure S89**  $^1\text{H}$  NMR spectra of compound A17

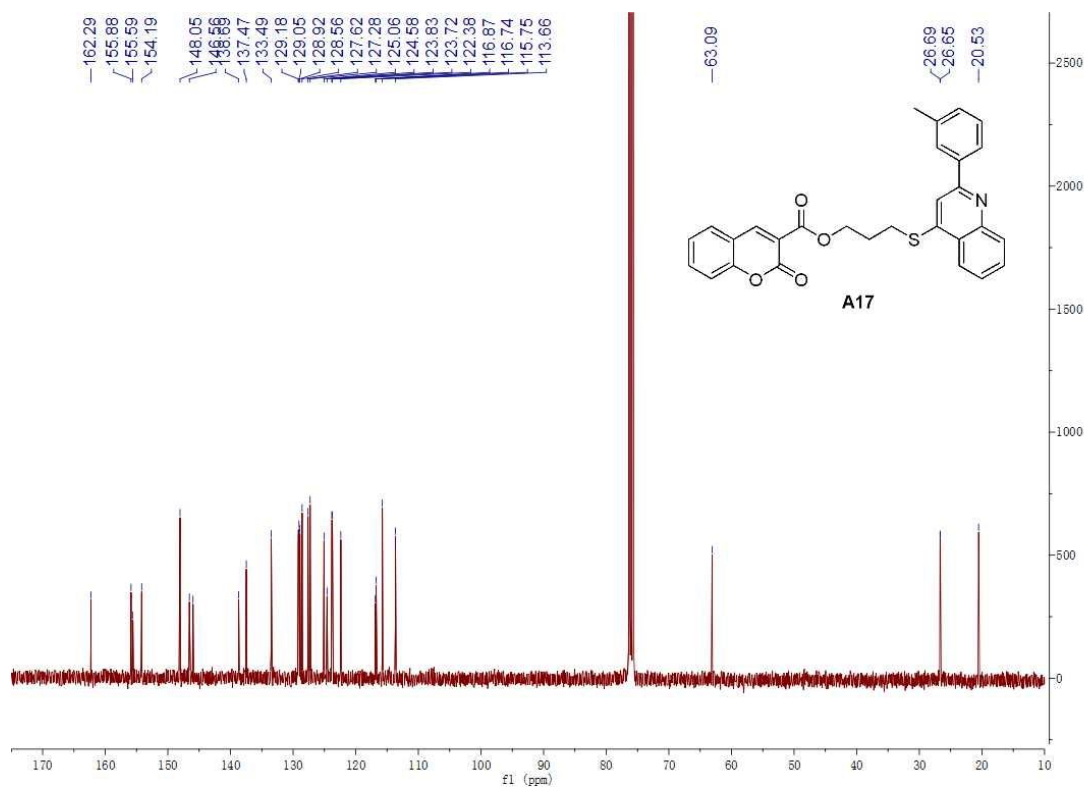

**Figure S90**  $^{13}\text{C}$  NMR spectra of compound A17

Item name: ZYQ-A17  
Item description:

Channel name: 1: Average Time 0.1217 min : TOF MS (50-1500) ESI+ : Centroided : Combined

4.28e7

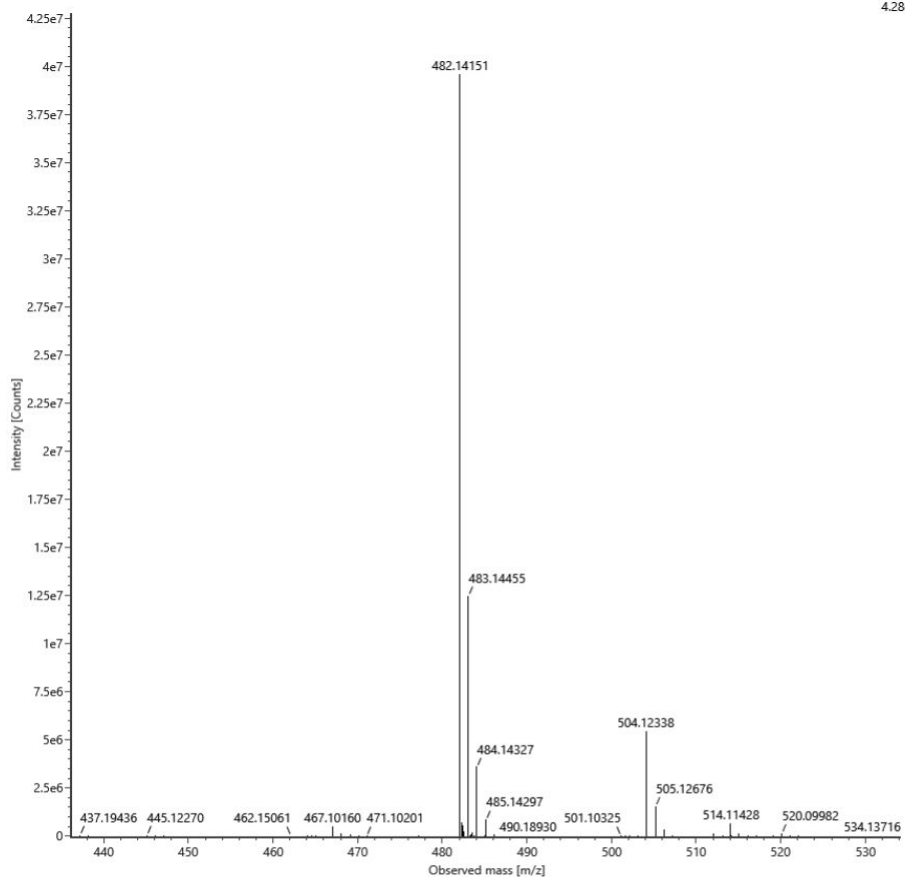

Figure S91 HRMS spectra of compound A17

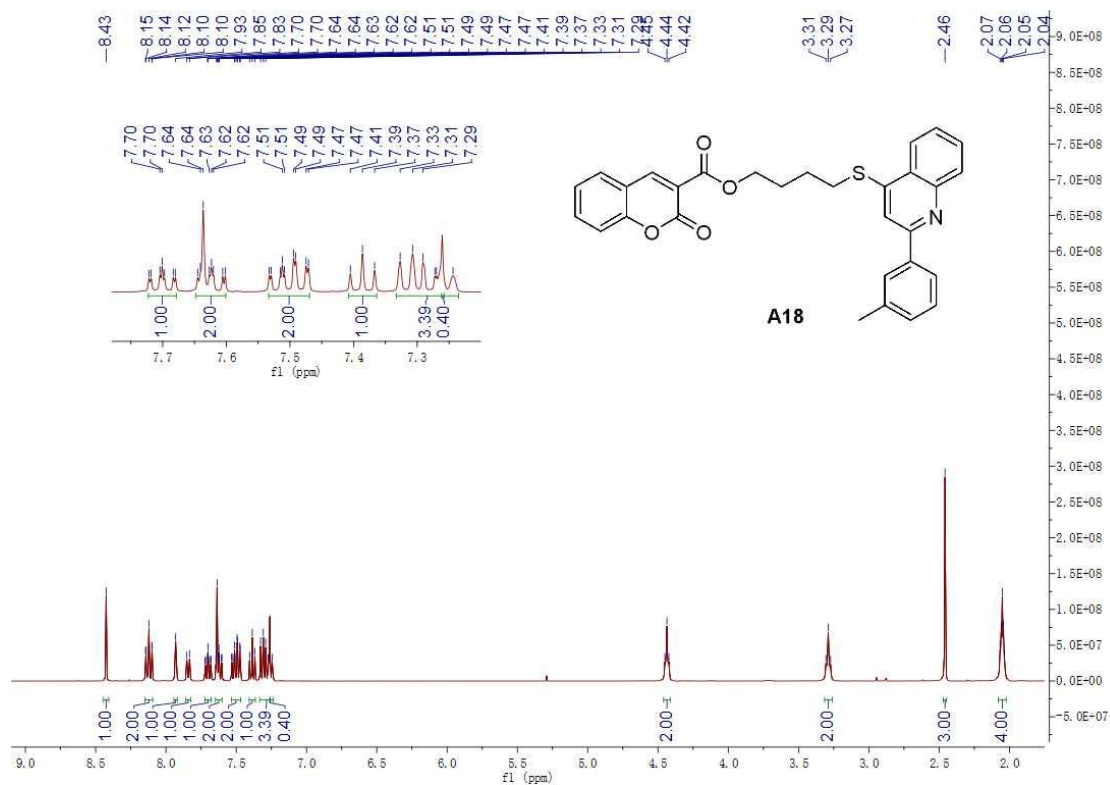

Figure S92 <sup>1</sup>H NMR spectra of compound A18

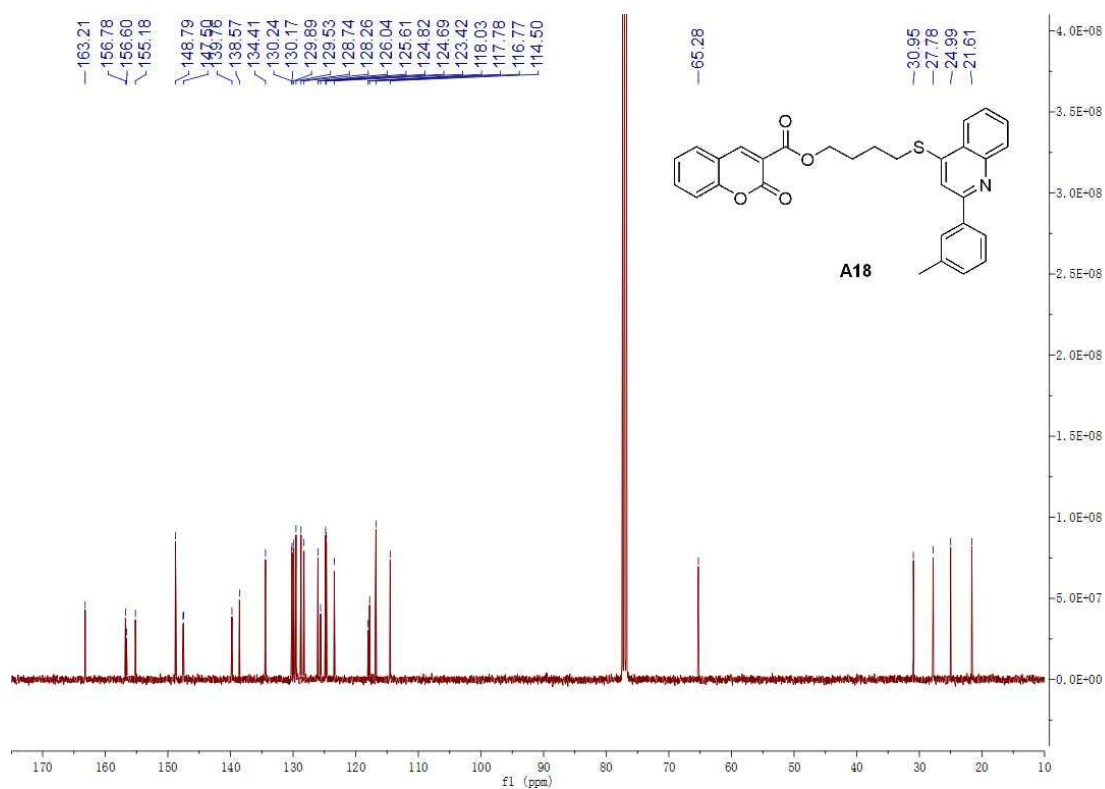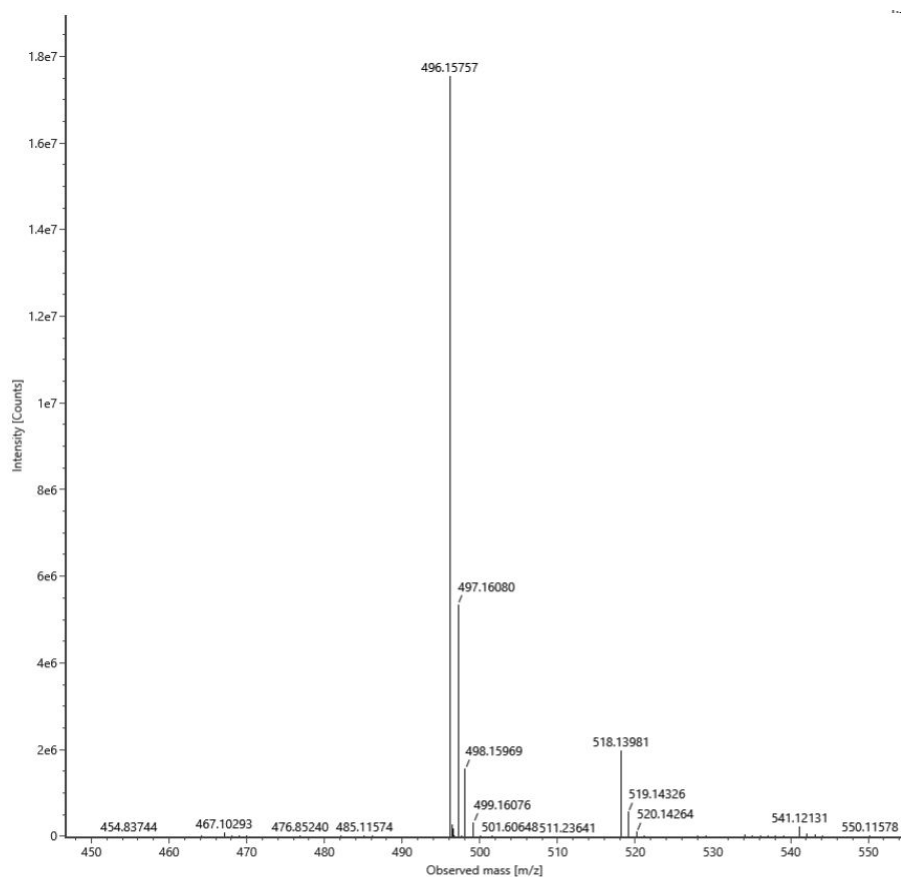



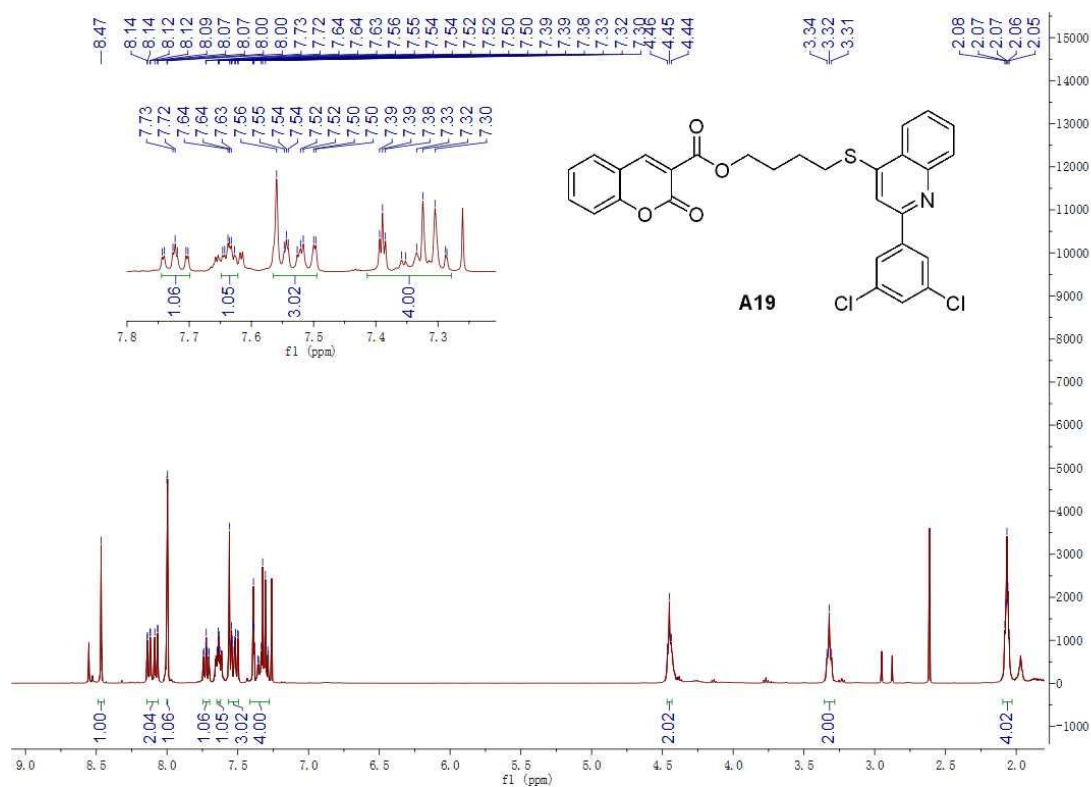

**Figure S95**  $^1\text{H}$  NMR spectra of compound A19

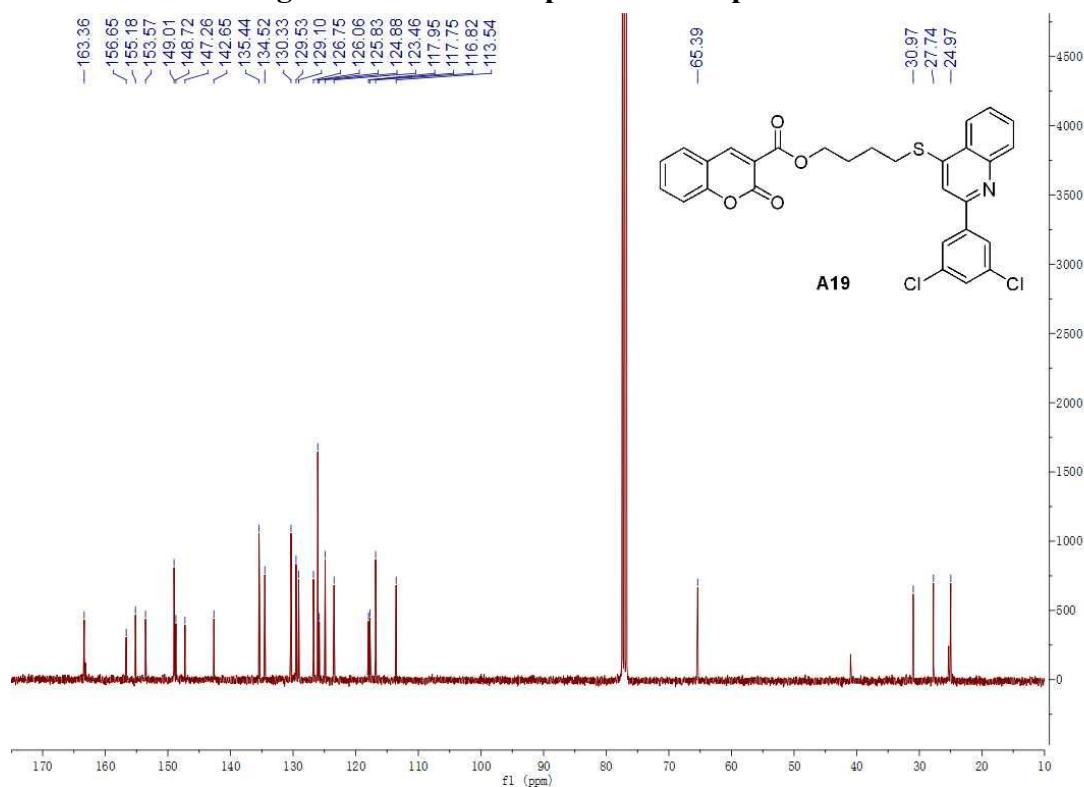

**Figure S96**  $^{13}\text{C}$  NMR spectra of compound A19

Item name: ZYQ-A42  
Item description:

Channel name: 1: Average Time 0.1132 min : TOF MS (50-1500) ESI+ : Centroided : Combined

1.04e6

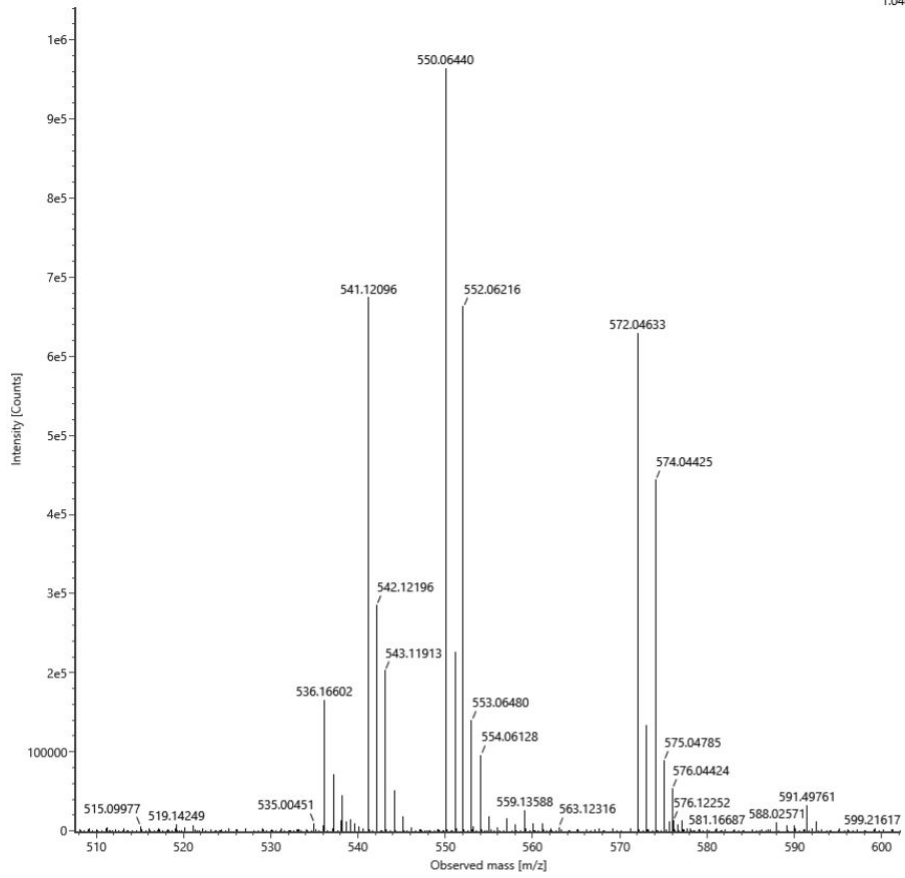

Figure S97 HRMS spectra of compound A19

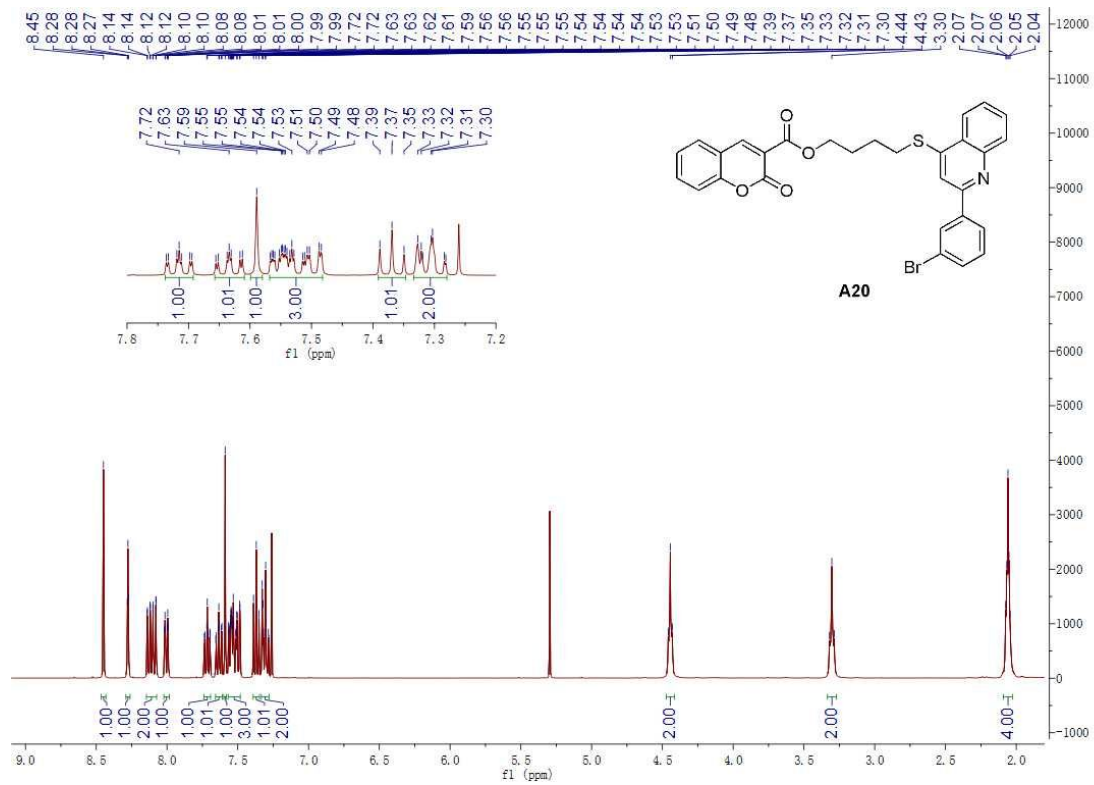

Figure S98 <sup>1</sup>H NMR spectra of compound A20

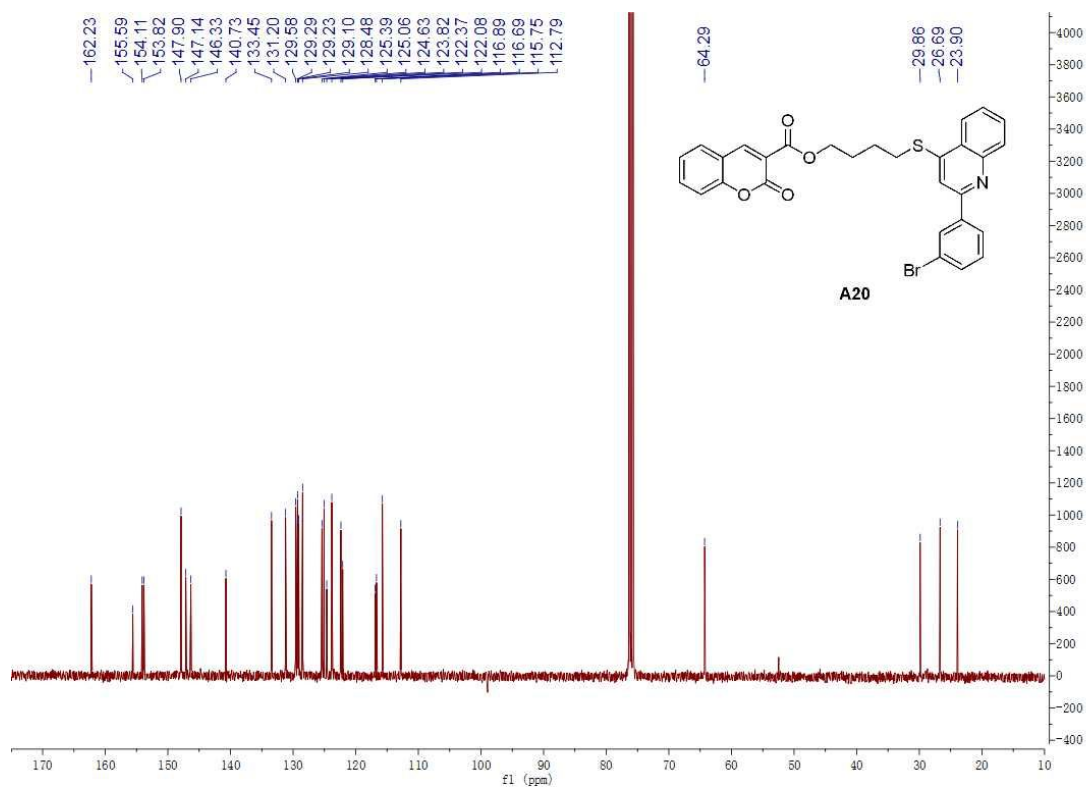

**Figure S99** <sup>13</sup>C NMR spectra of compound A20

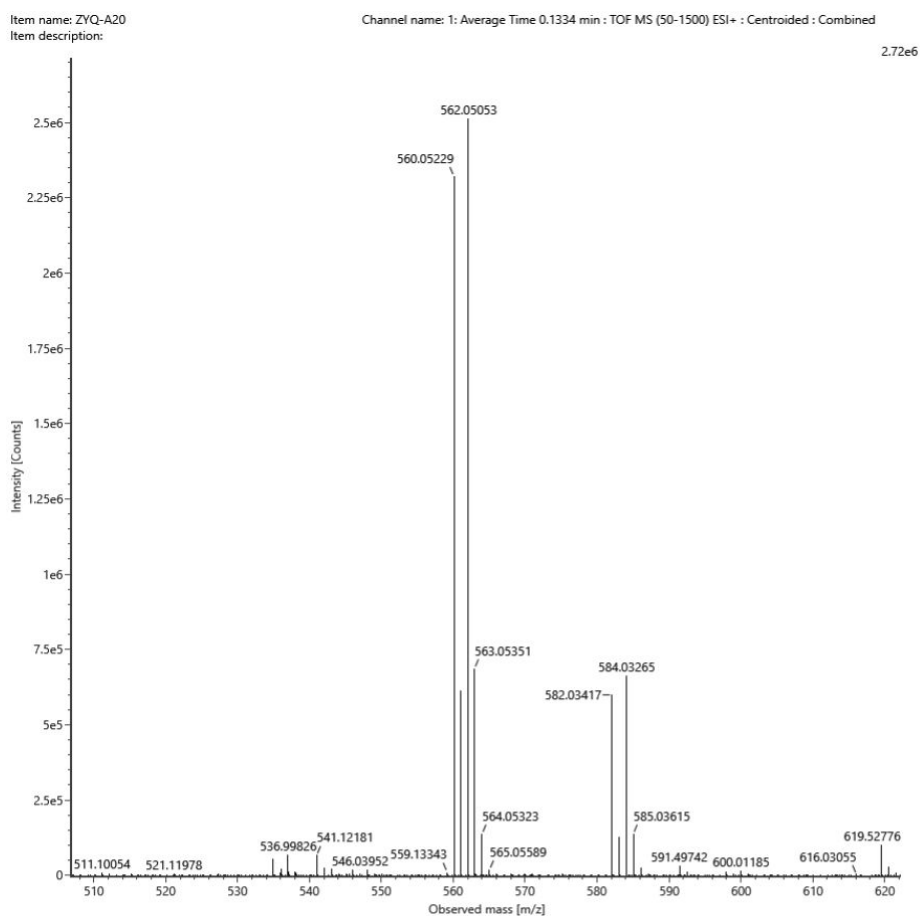

**Figure S100** HRMS spectra of compound A20

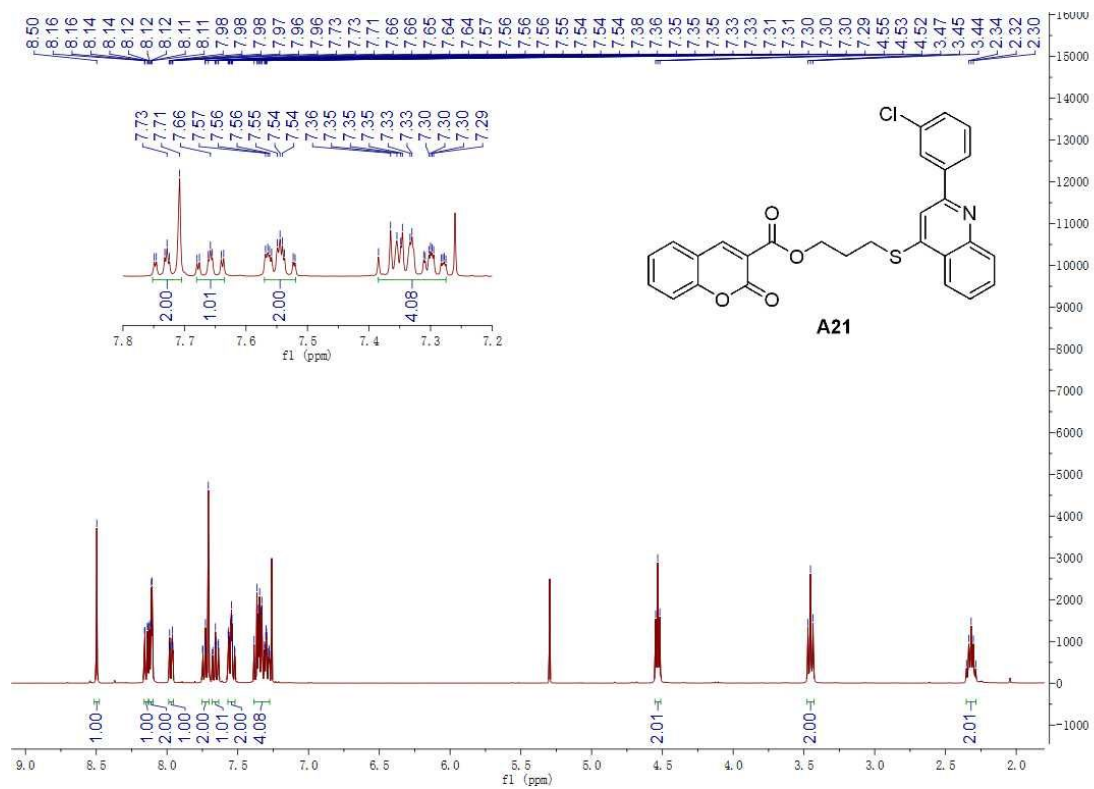

**Figure S101 <sup>1</sup>H NMR spectra of compound A21**

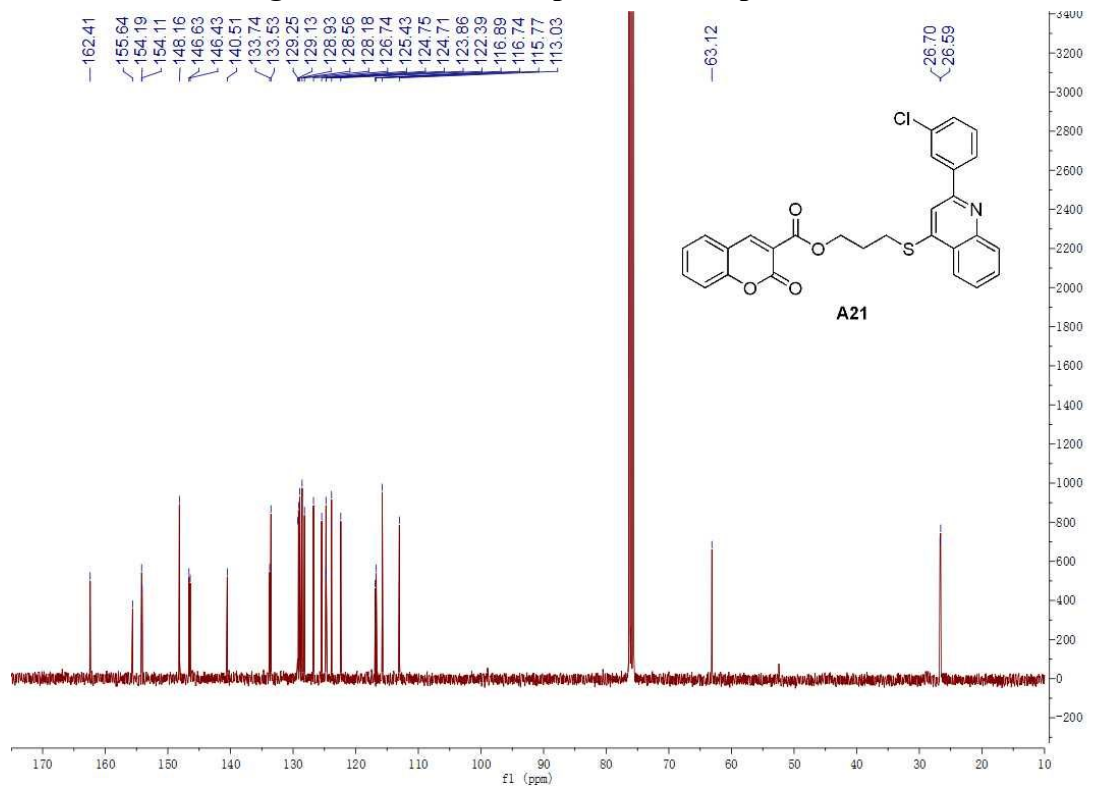

**Figure S102 <sup>13</sup>C NMR spectra of compound A21**

Item name: ZYQ-A21  
Item description:

Channel name: 1: Average Time 0.1505 min : TOF MS (50-1500) ESI+ : Centroided : Combined

4.65e6

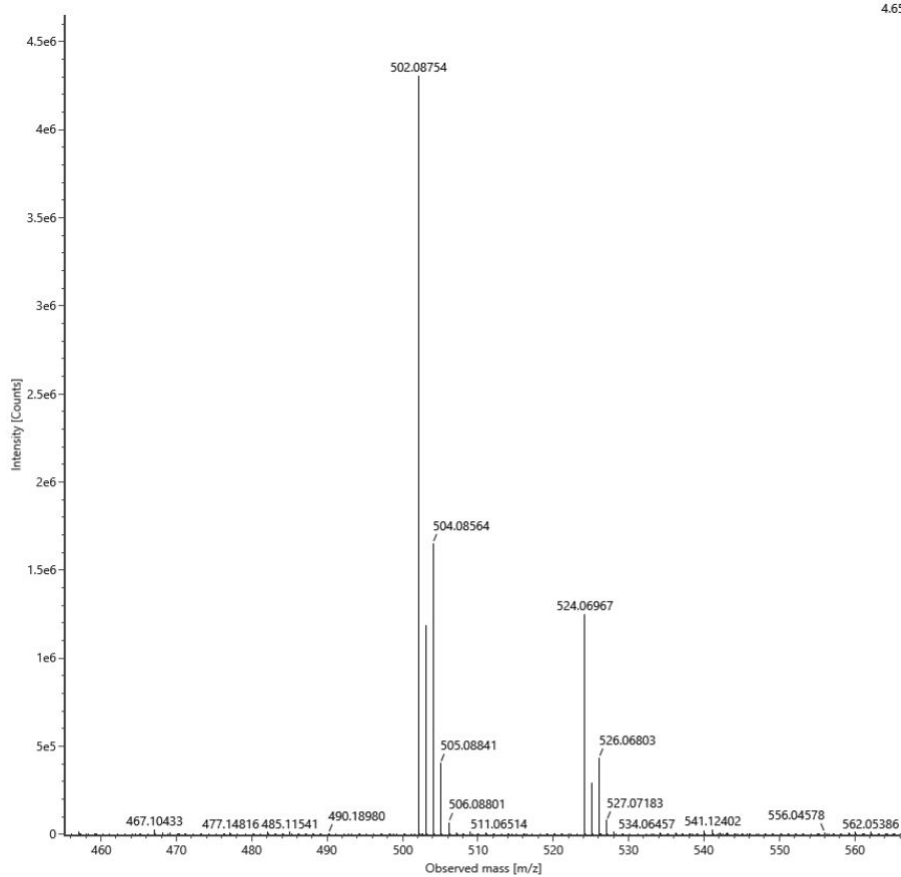

Figure S103 HRMS spectra of compound A21

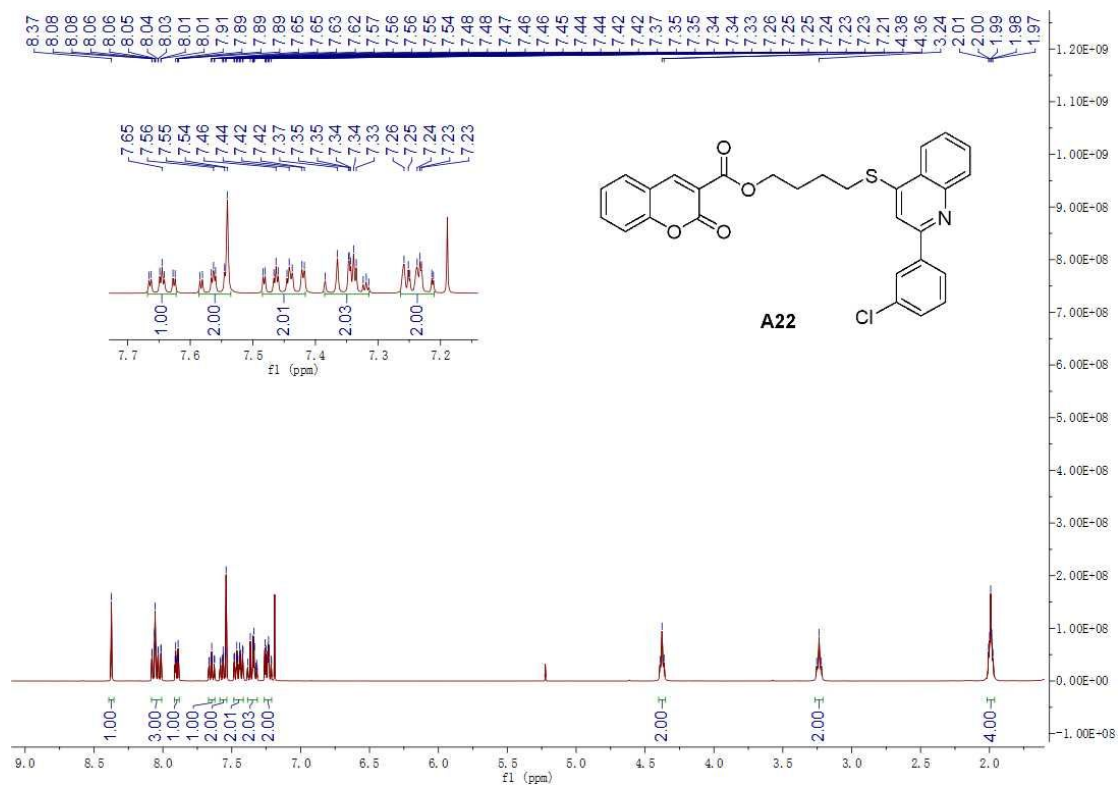

Figure S104 <sup>1</sup>H NMR spectra of compound A22

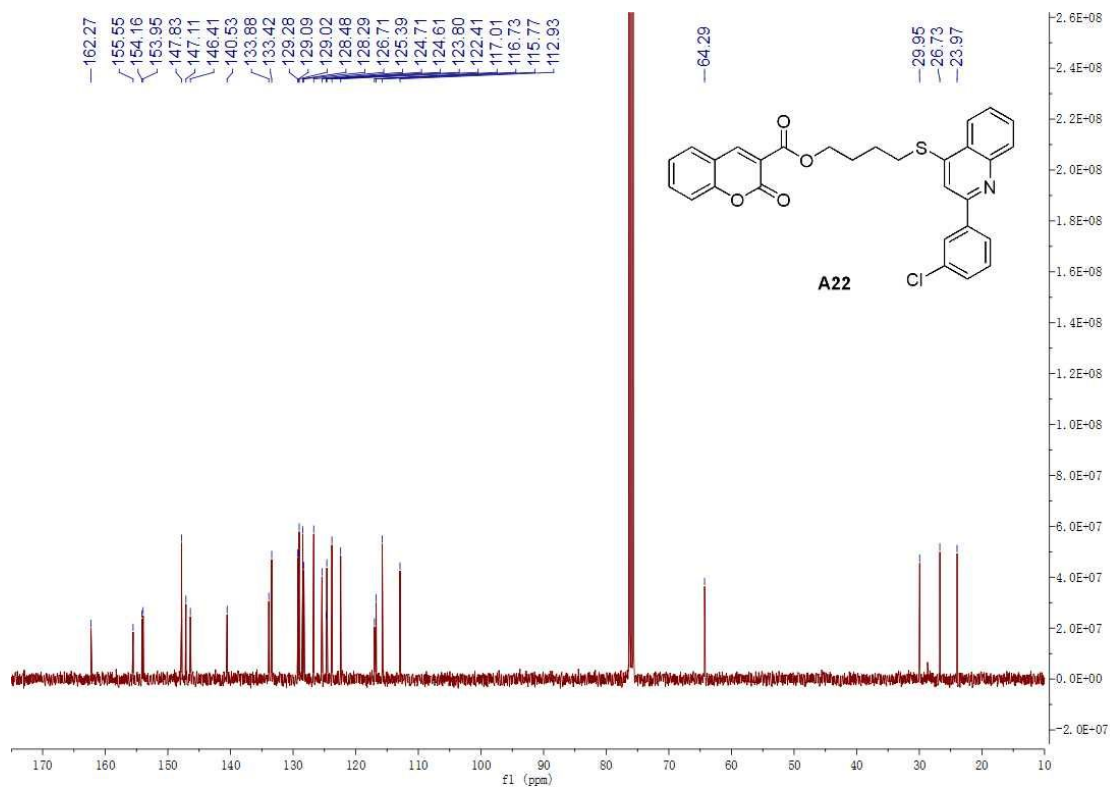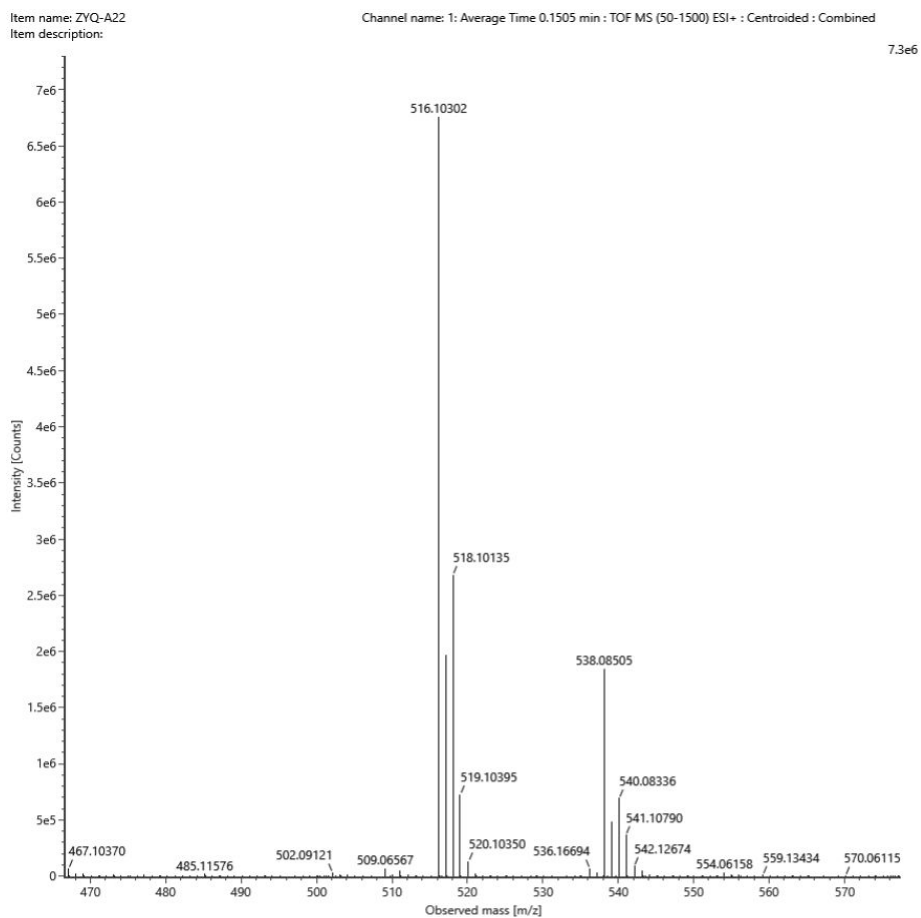

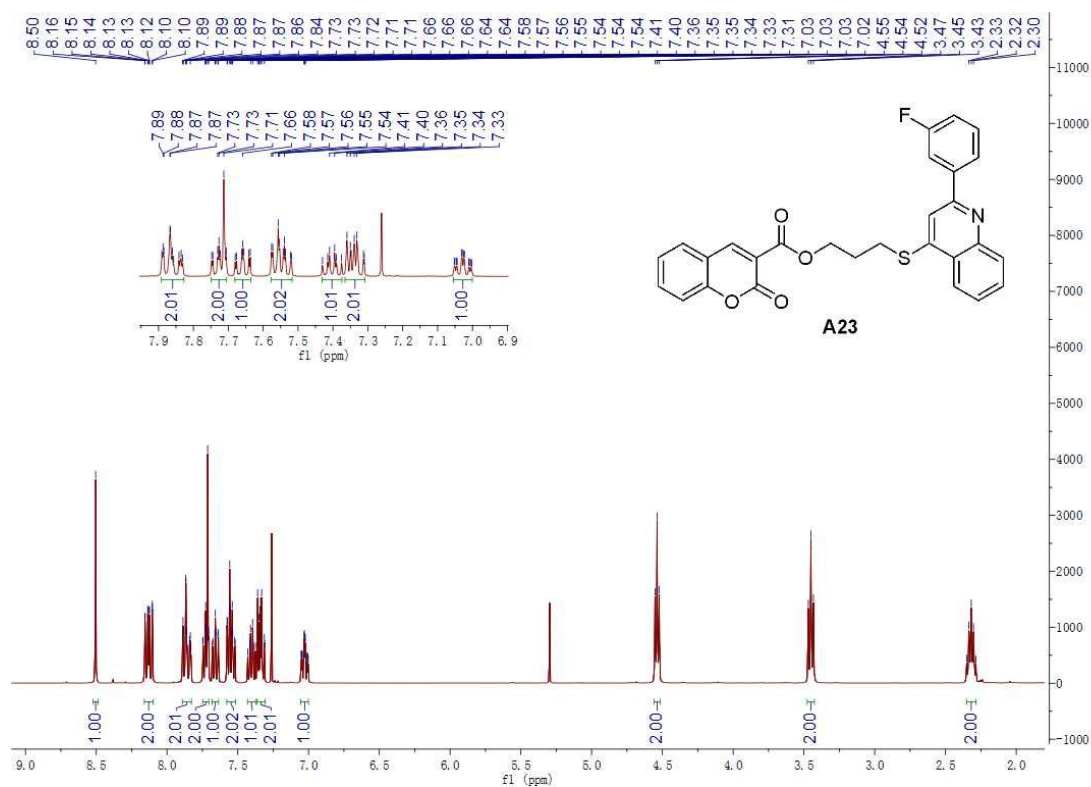

Figure S107  $^1\text{H}$  NMR spectra of compound A23

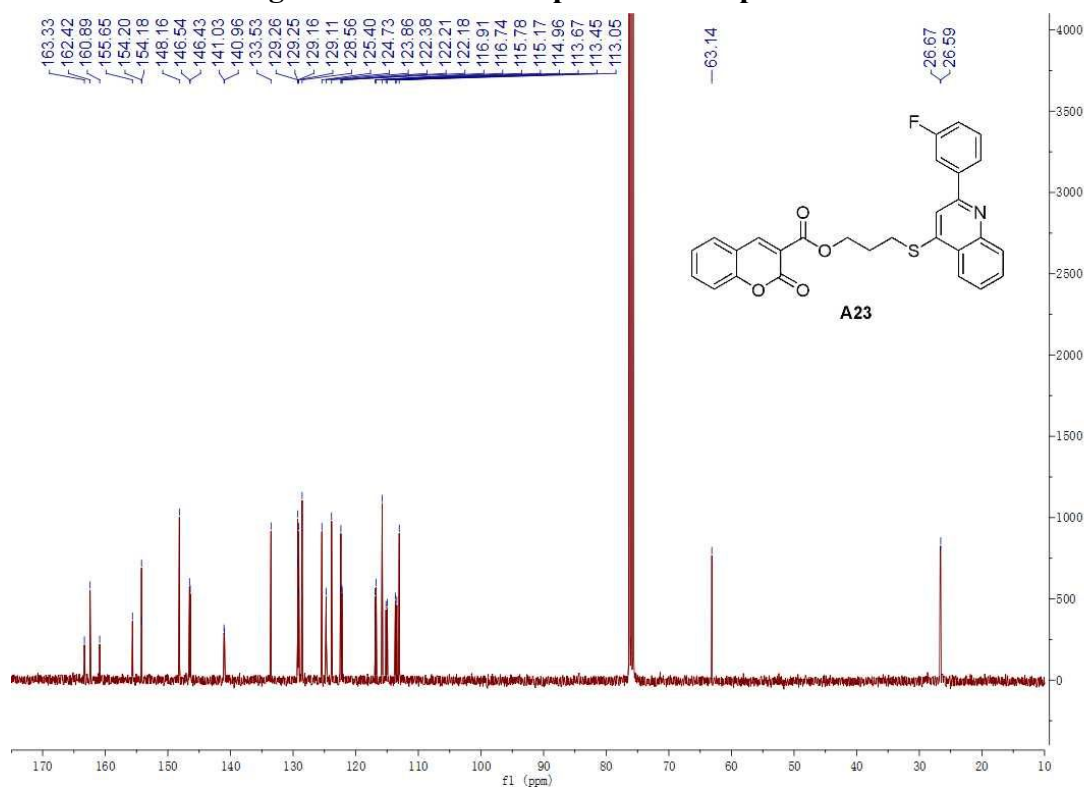

Figure S108  $^{13}\text{C}$  NMR spectra of compound A23

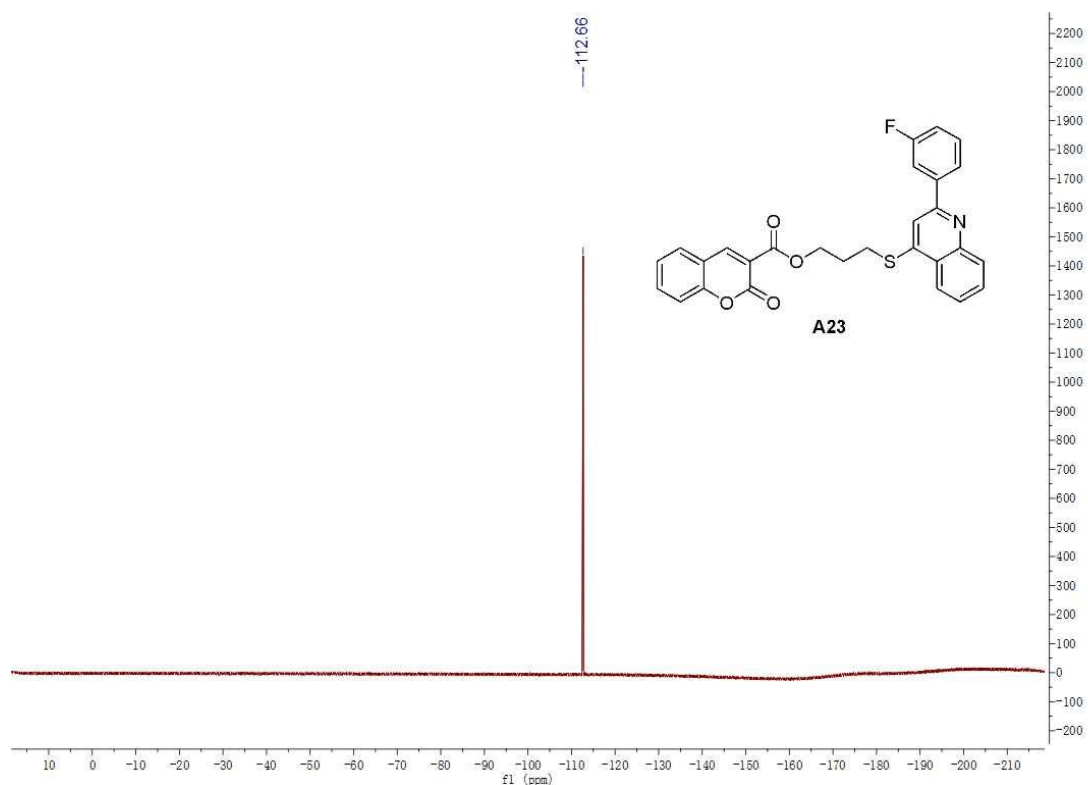

**Figure S109 <sup>19</sup>F NMR spectra of compound A23**

Item name: ZYQ-A23  
Item description:

Channel name: 1: Average Time 0.1377 min : TOF MS (50-1500) ESI+ : Centroided : Combined

1.19e7

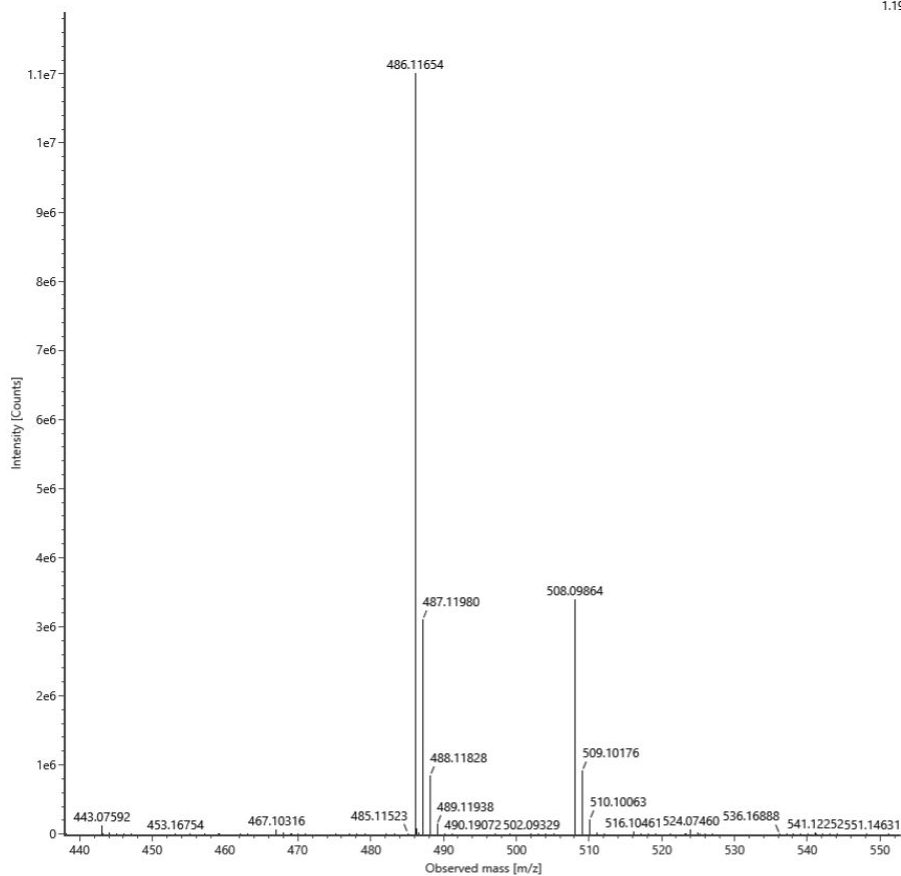

**Figure S110 HRMS spectra of compound A23**



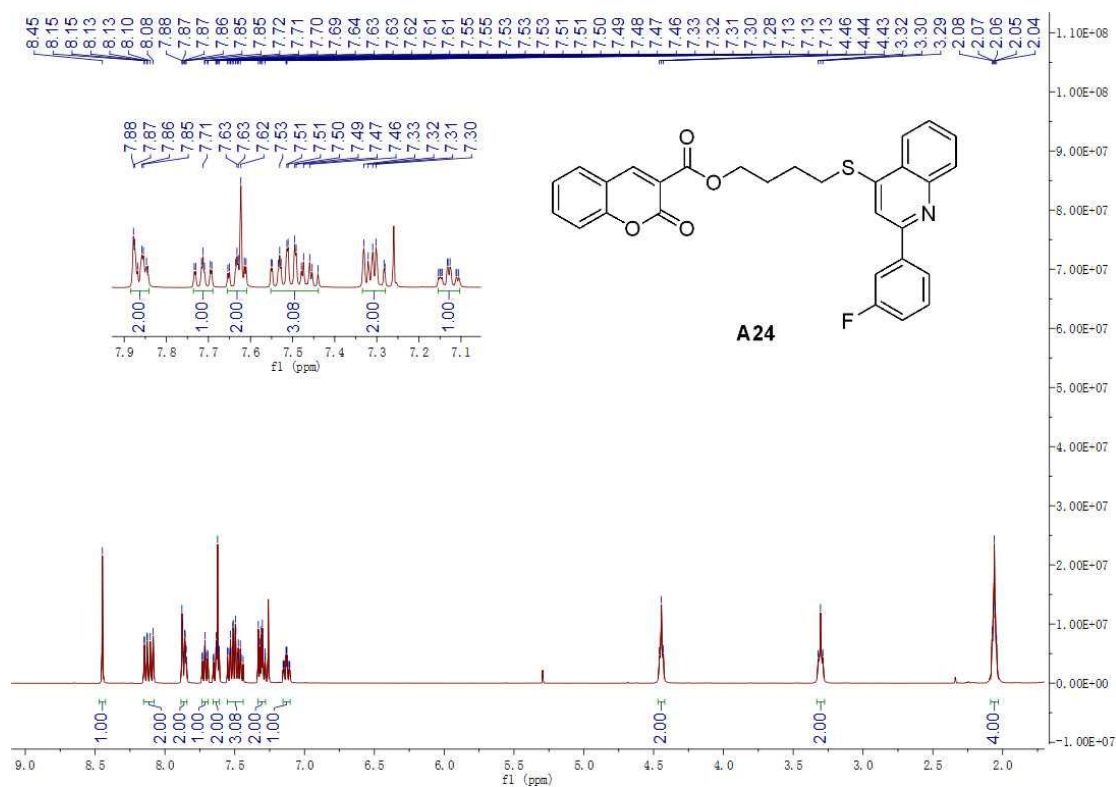

**Figure S111 <sup>1</sup>H NMR spectra of compound A24**

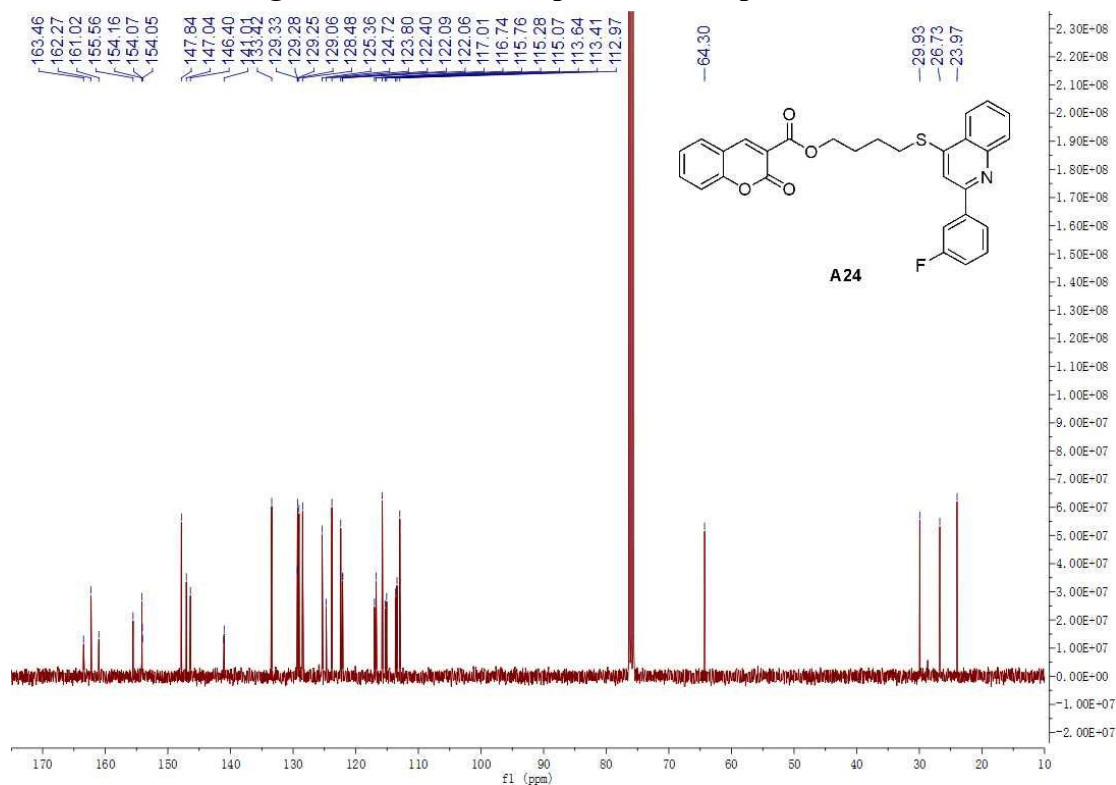

**Figure S112 <sup>13</sup>C NMR spectra of compound A24**

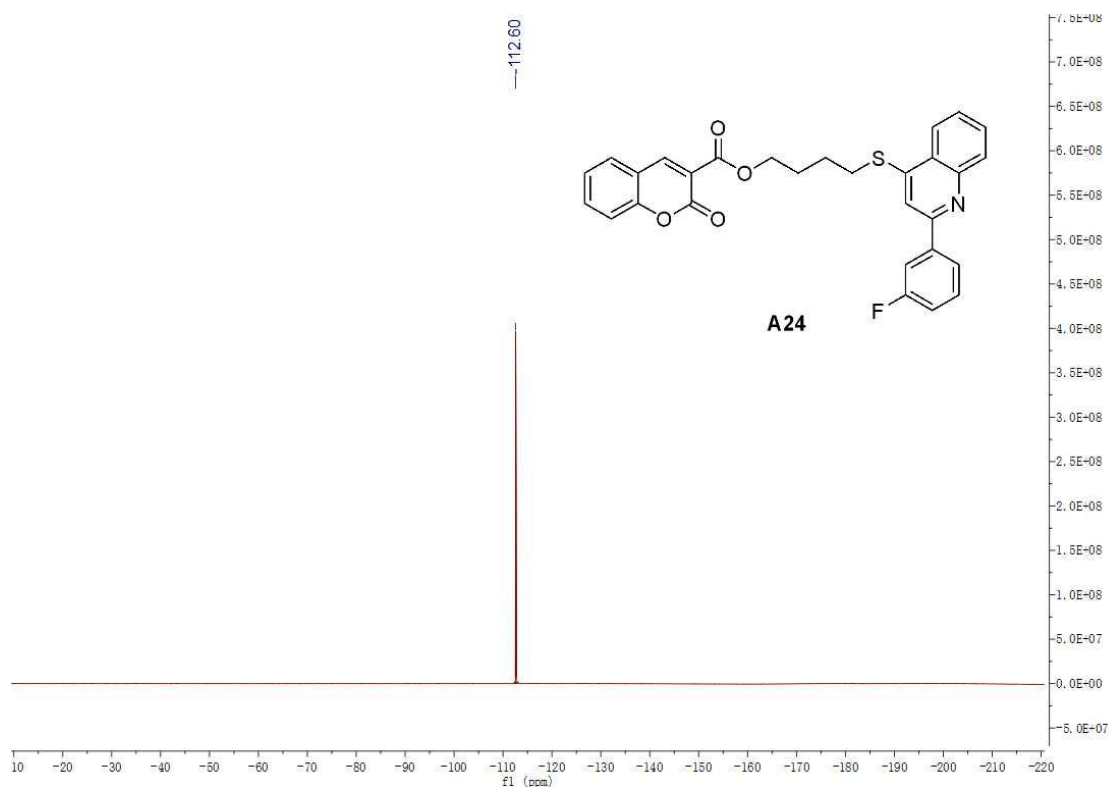

**Figure S113 <sup>19</sup>F NMR spectra of compound A24**

Item name: ZYQ-A24  
Item description:

Channel name: 1: Average Time 0.1174 min : TOF MS (50-1500) ESI+ : Centroided : Combined

1.32e7

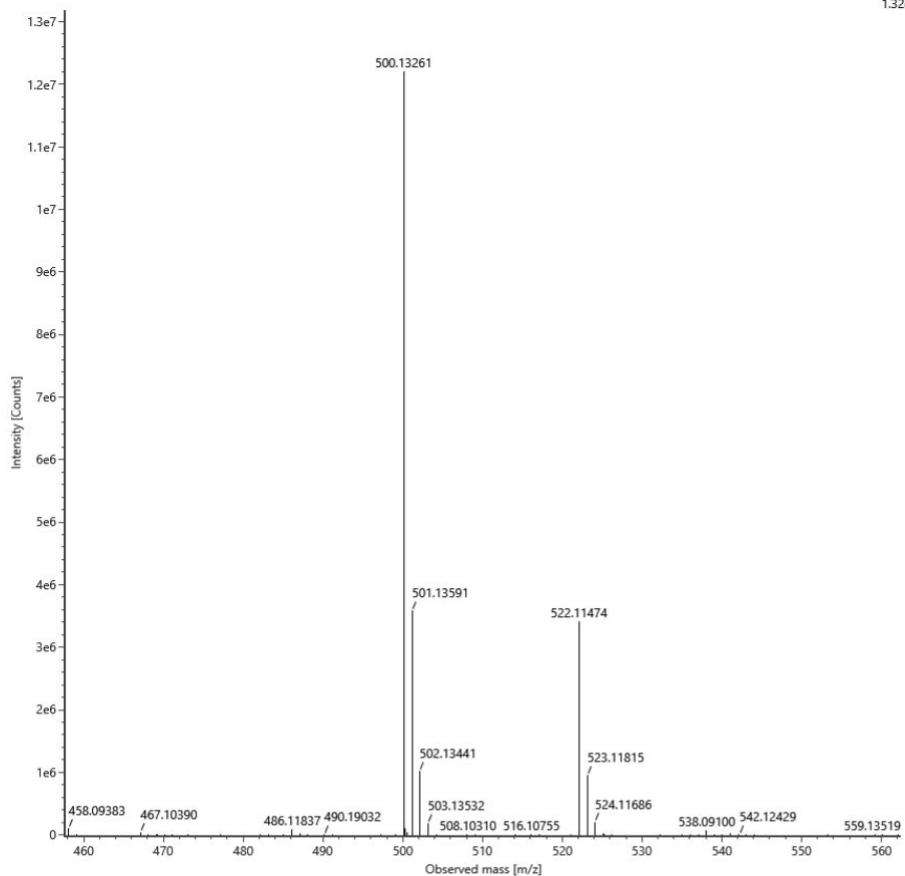

**Figure S114 HRMS spectra of compound A24**

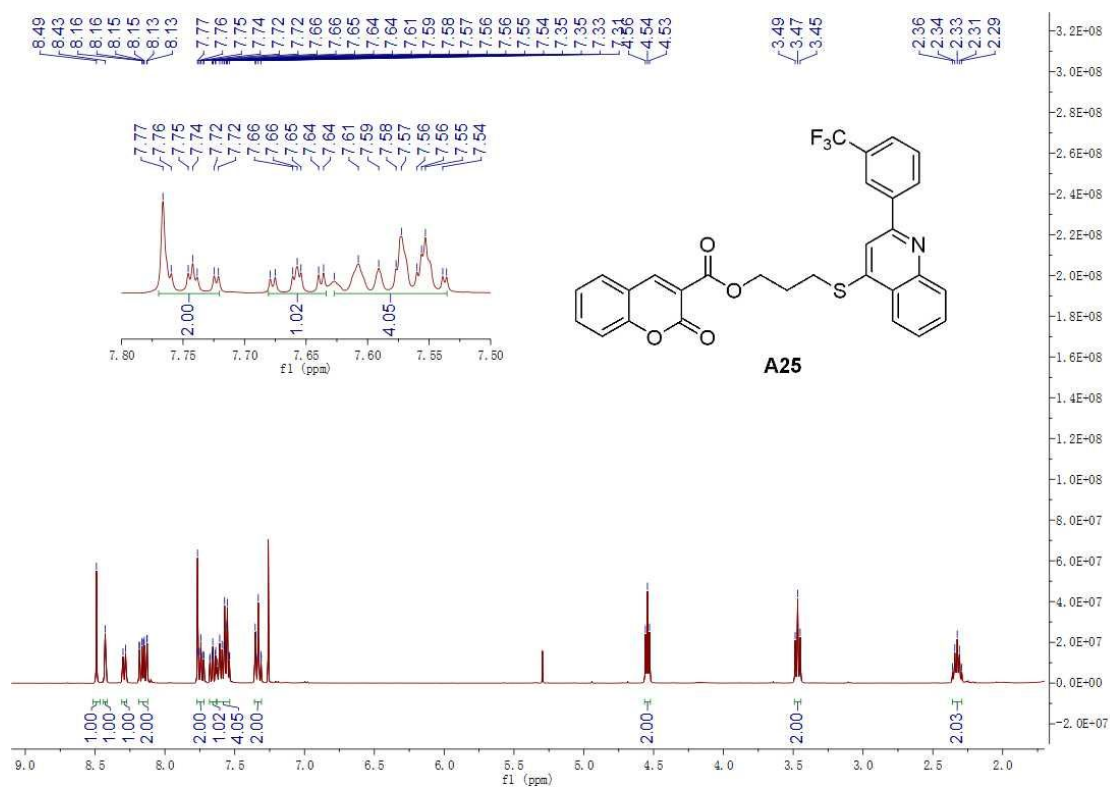

**Figure S115  $^1\text{H}$  NMR spectra of compound A25**

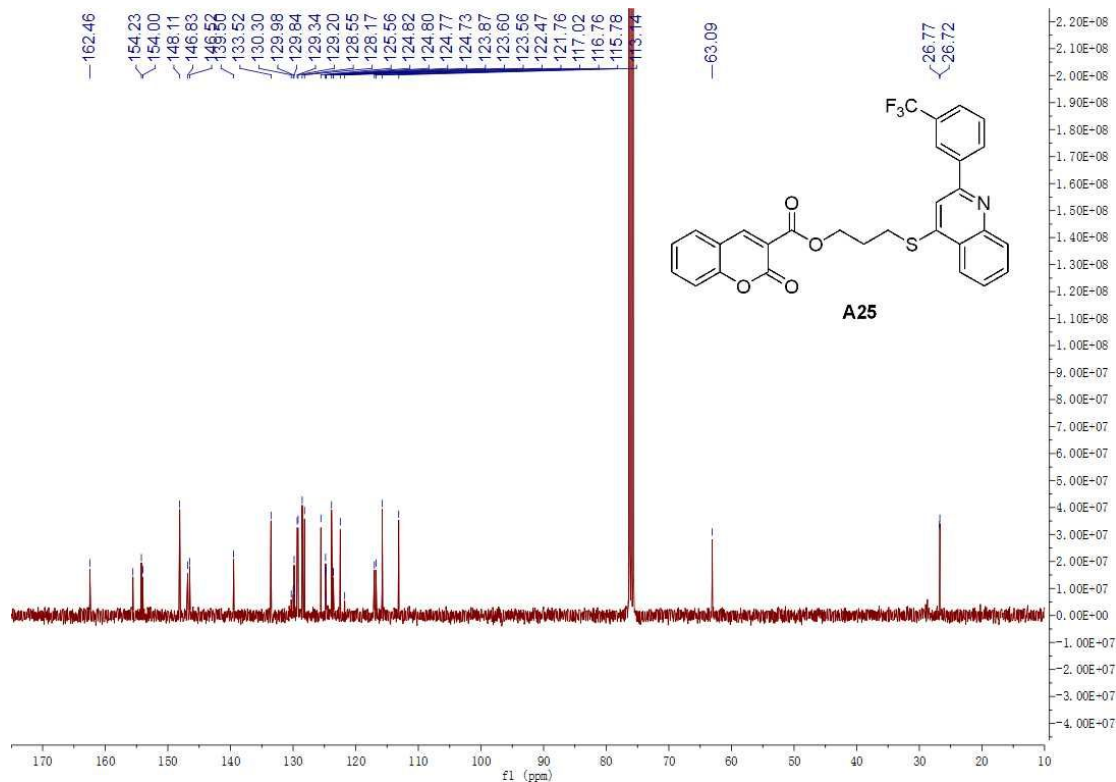

**Figure S116  $^{13}\text{C}$  NMR spectra of compound A25**

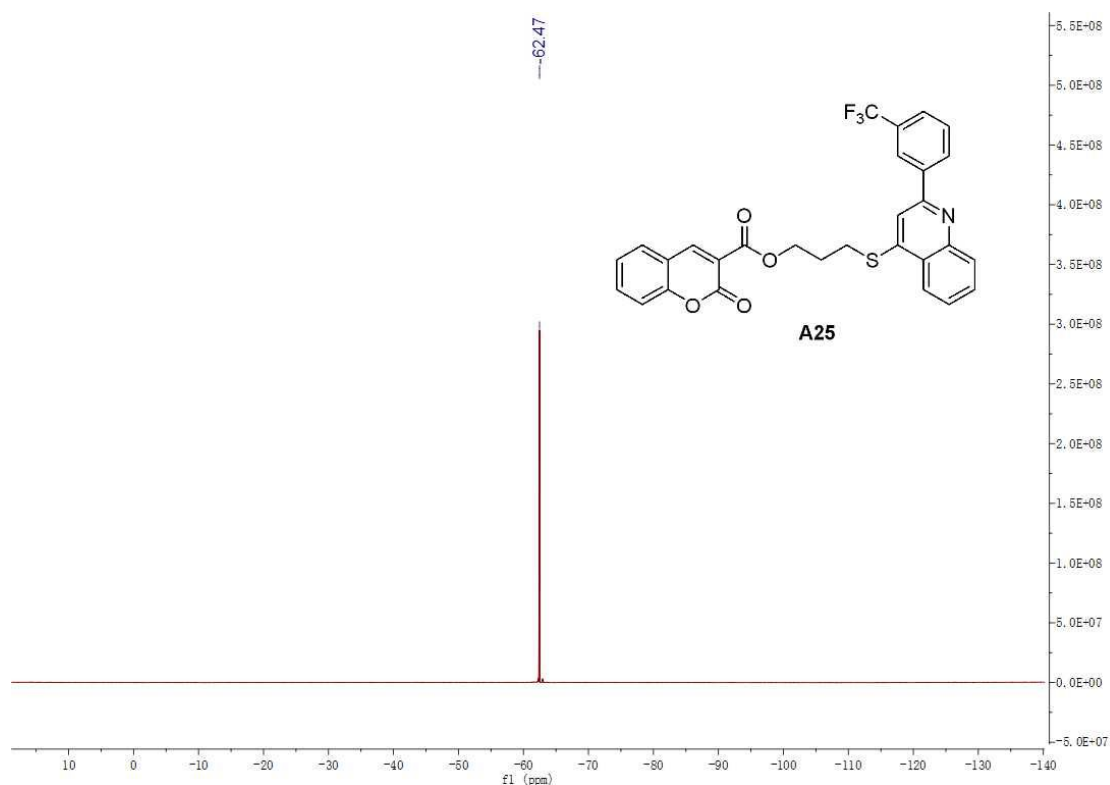

**Figure S117  $^{19}\text{F}$  NMR spectra of compound A25**

Item name: ZYQ-A25  
Item description:

Channel name: 1: Average Time 0.1334 min : TOF MS (50-1500) ESI+ : Centroided : Combined

7.7e6

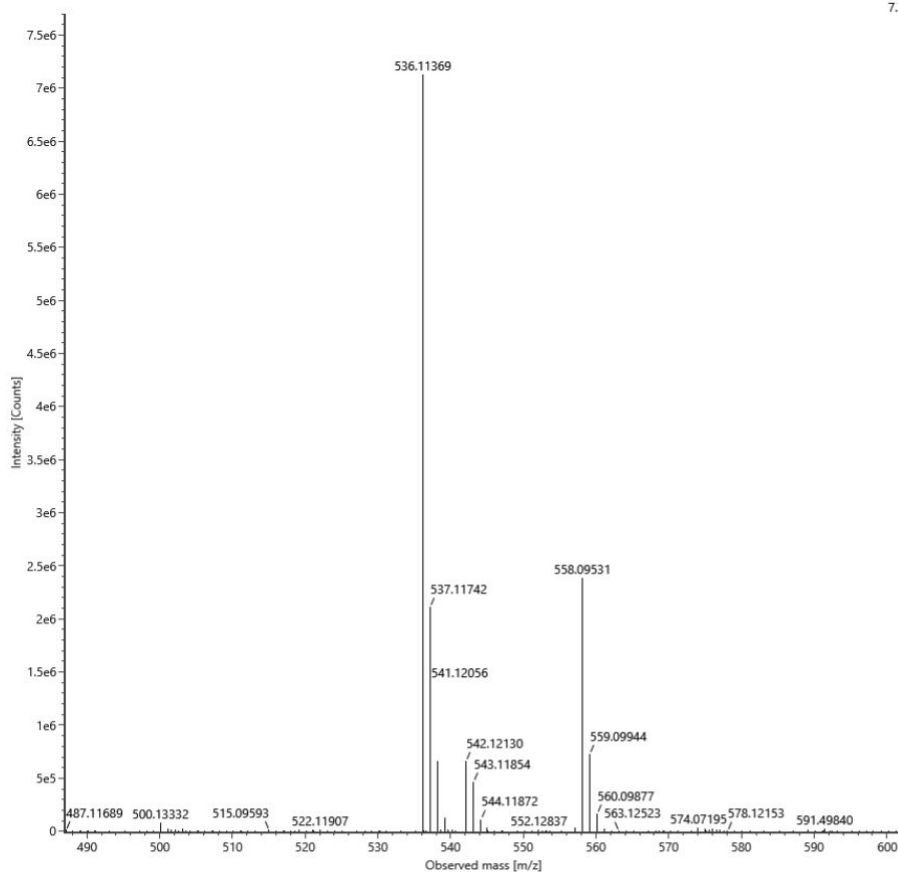

**Figure S118 HRMS spectra of compound A25**

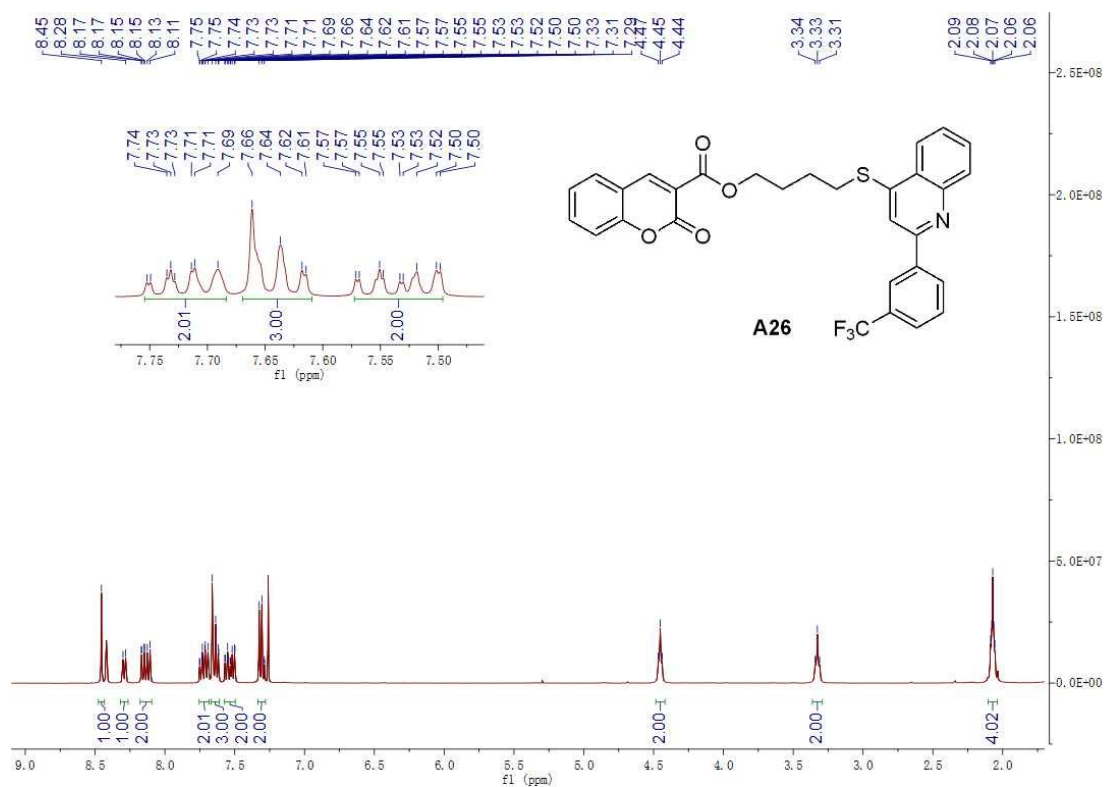

**Figure S119**  $^1\text{H}$  NMR spectra of compound A26

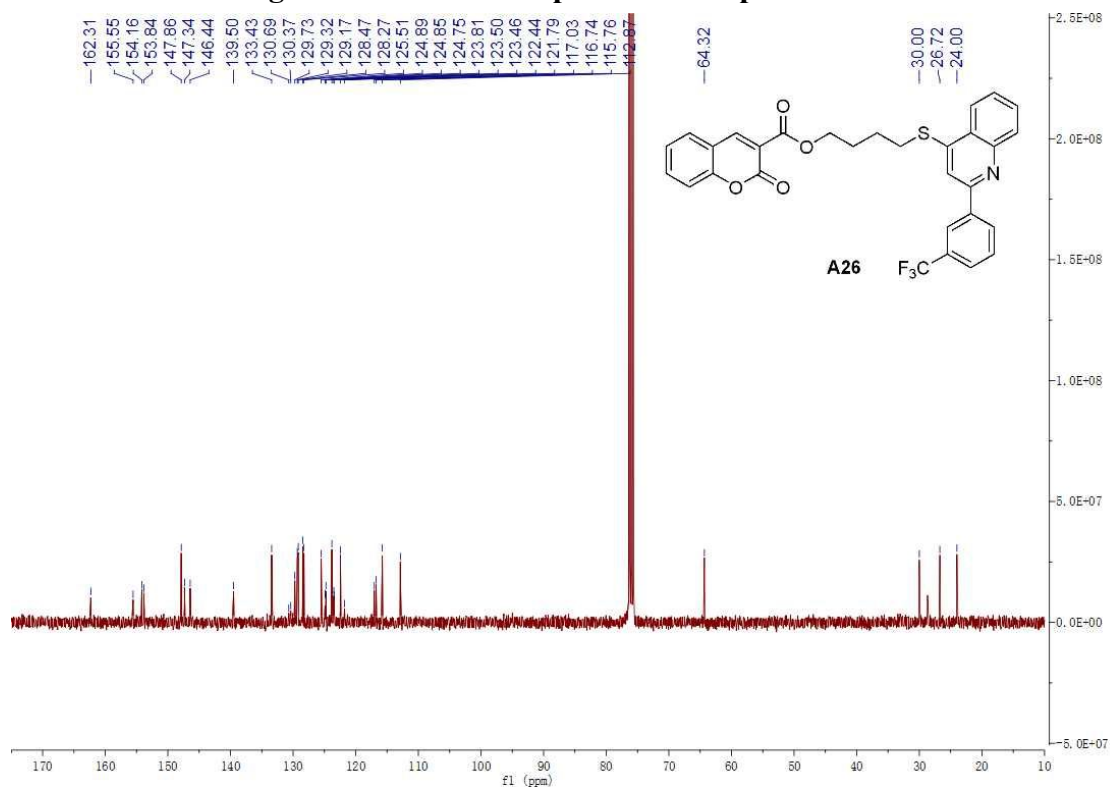

**Figure S120**  $^{13}\text{C}$  NMR spectra of compound A26

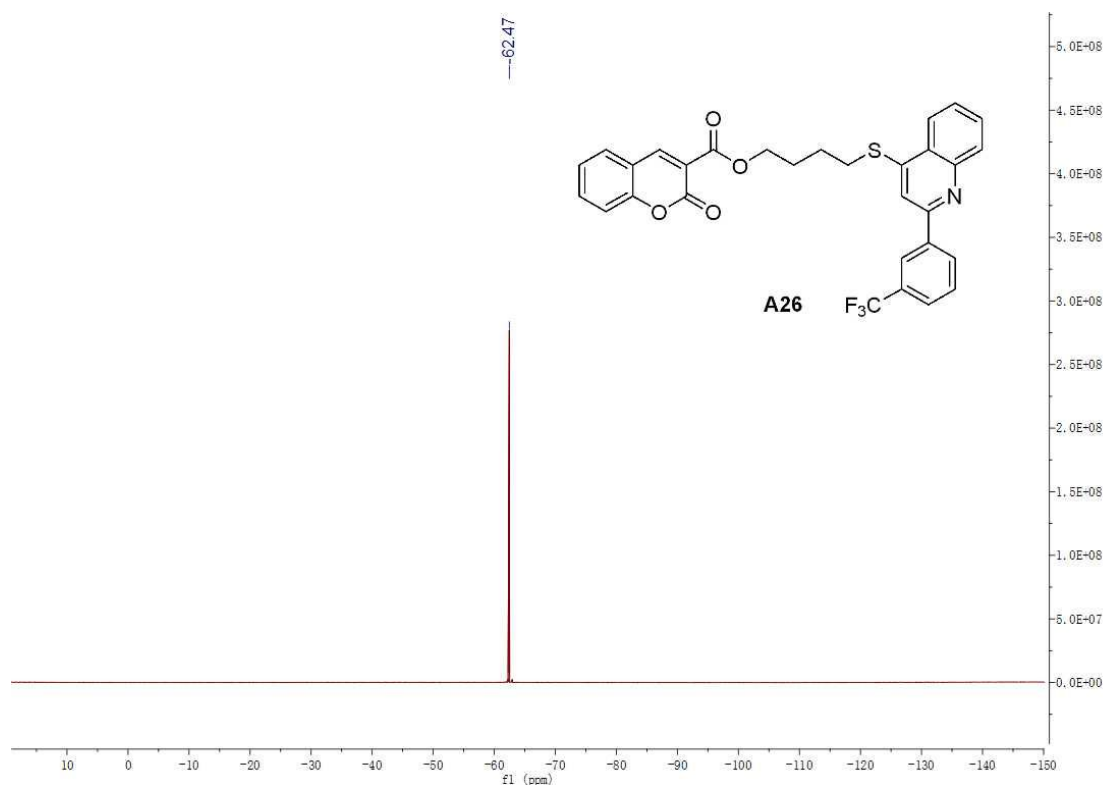

**Figure S121 <sup>19</sup>F NMR spectra of compound A26**

Item name: ZYQ-A26  
Item description:

Channel name: 1: Average Time 0.1377 min : TOF MS (50-1500) ESI+ : Centroided : Combined

1.34e6

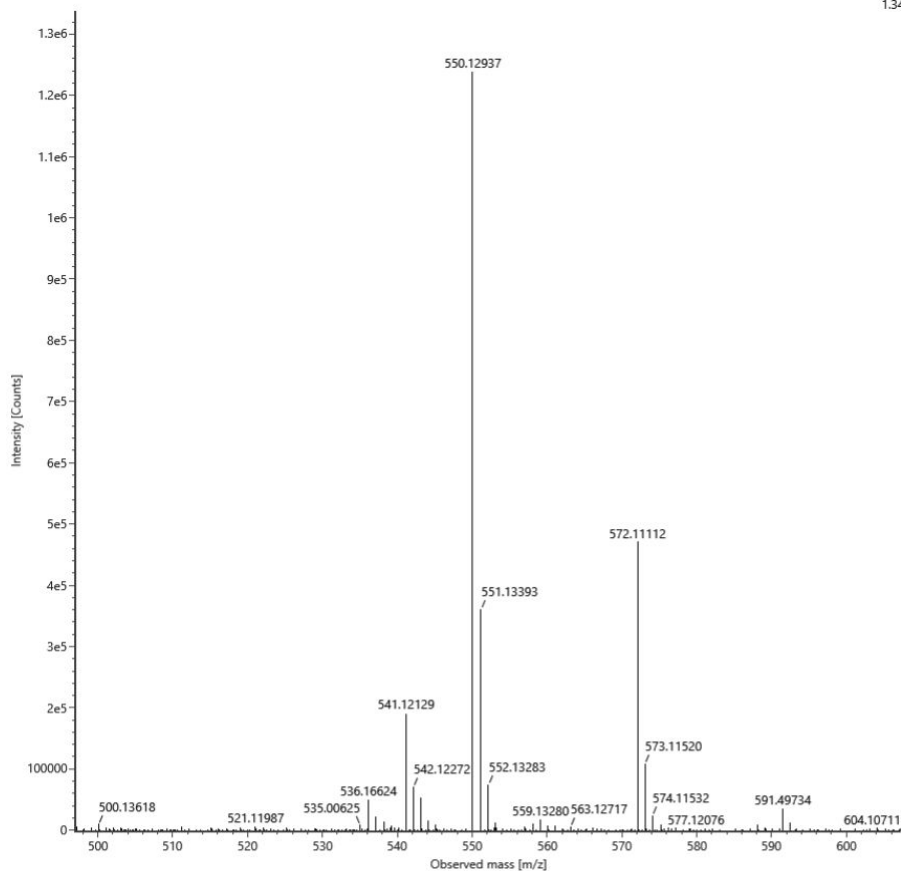

**Figure S122 HRMS spectra of compound A26**

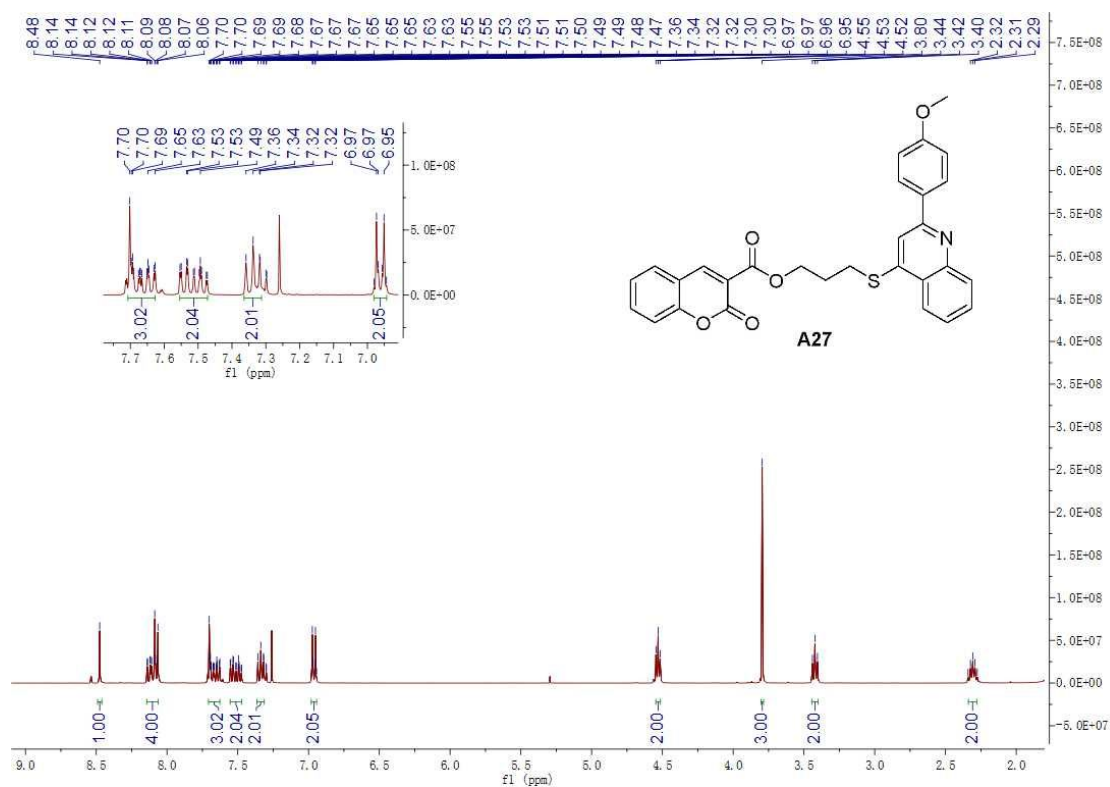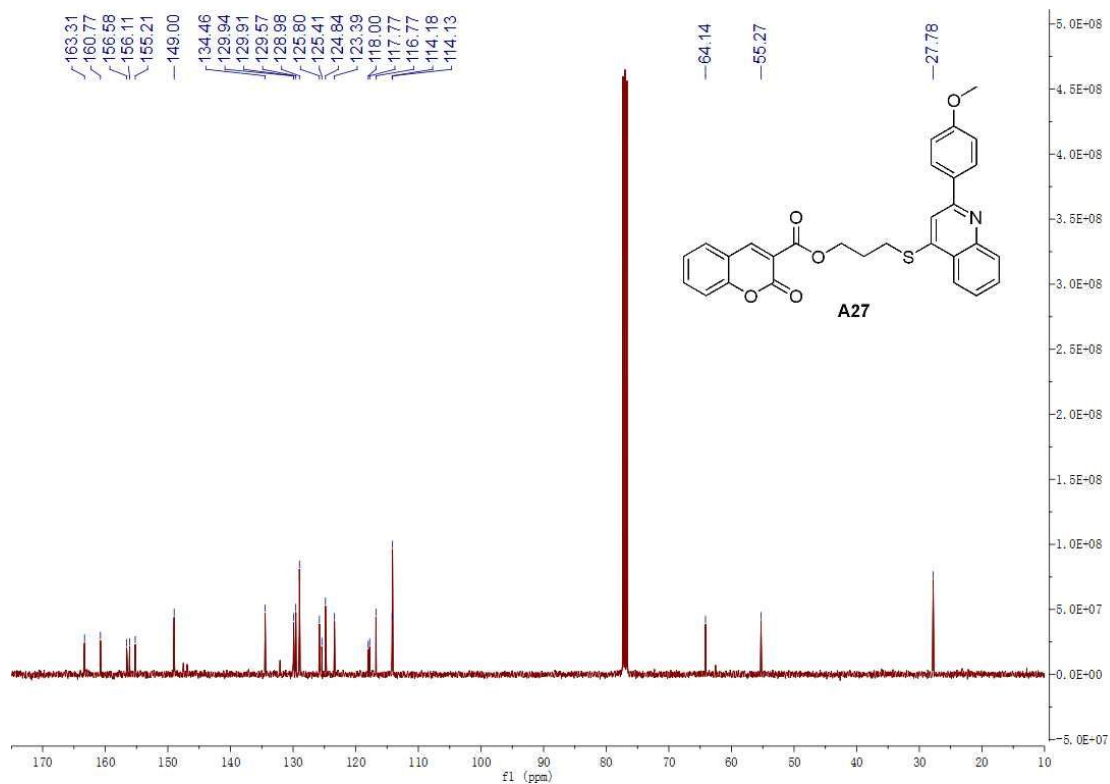

Item name: ZYQ-A27  
Item description:

Channel name: 1: Average Time 0.1131 min : TOF MS (50-1500) ESI+ : Centroided : Combined

1.52e7

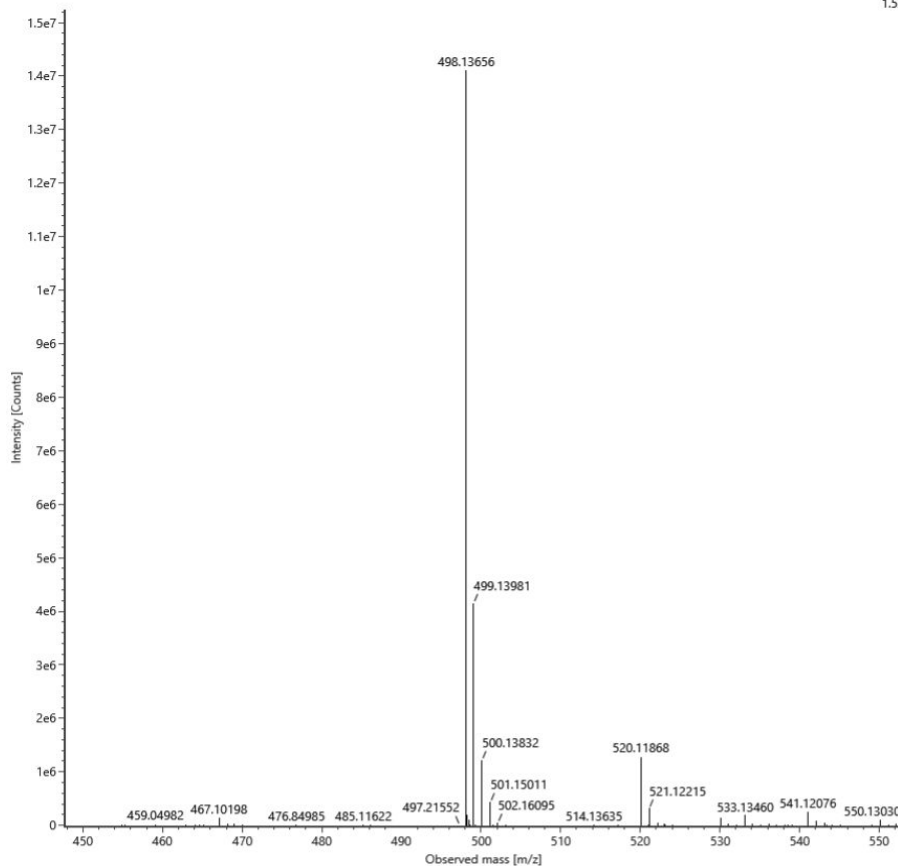

Figure S125 HRMS spectra of compound A27

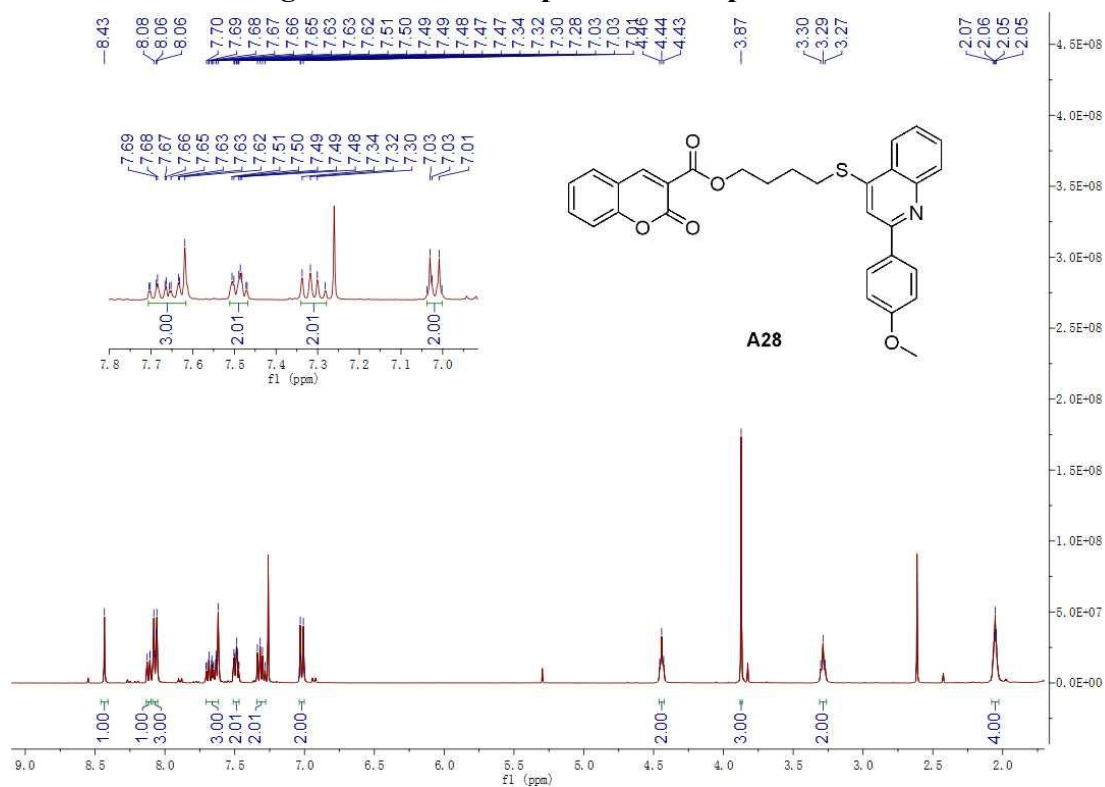

Figure S126 <sup>1</sup>H NMR spectra of compound A28



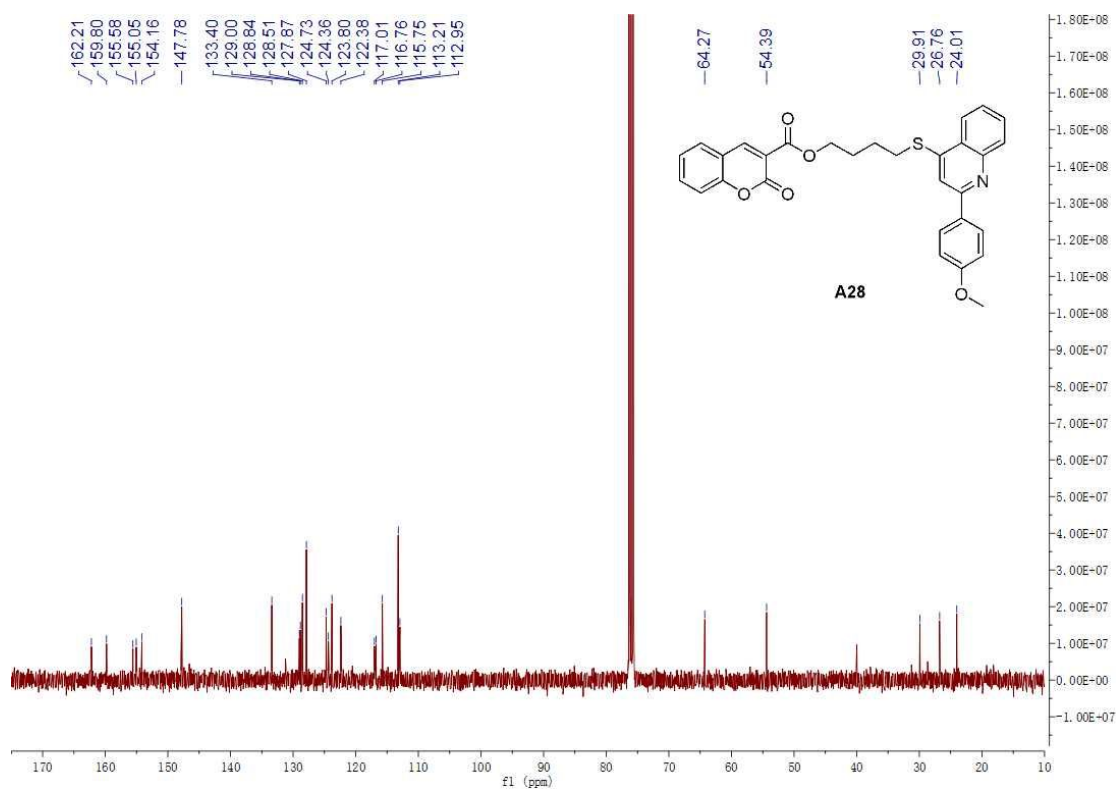

**Figure S127 <sup>13</sup>C NMR spectra of compound A28**

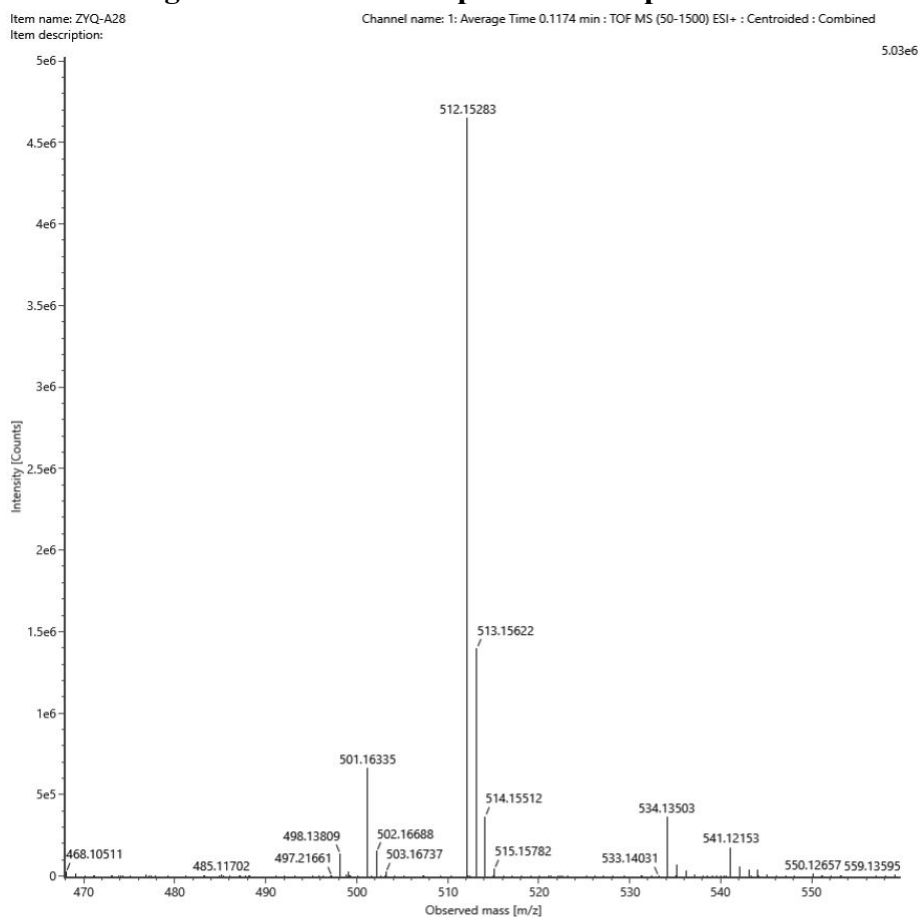



Item name: ZYQ-A29  
Item description:

Channel name: 1: Average Time 0.1174 min : TOF MS (50-1500) ESI+ : Centroided : Combined

2.94e7

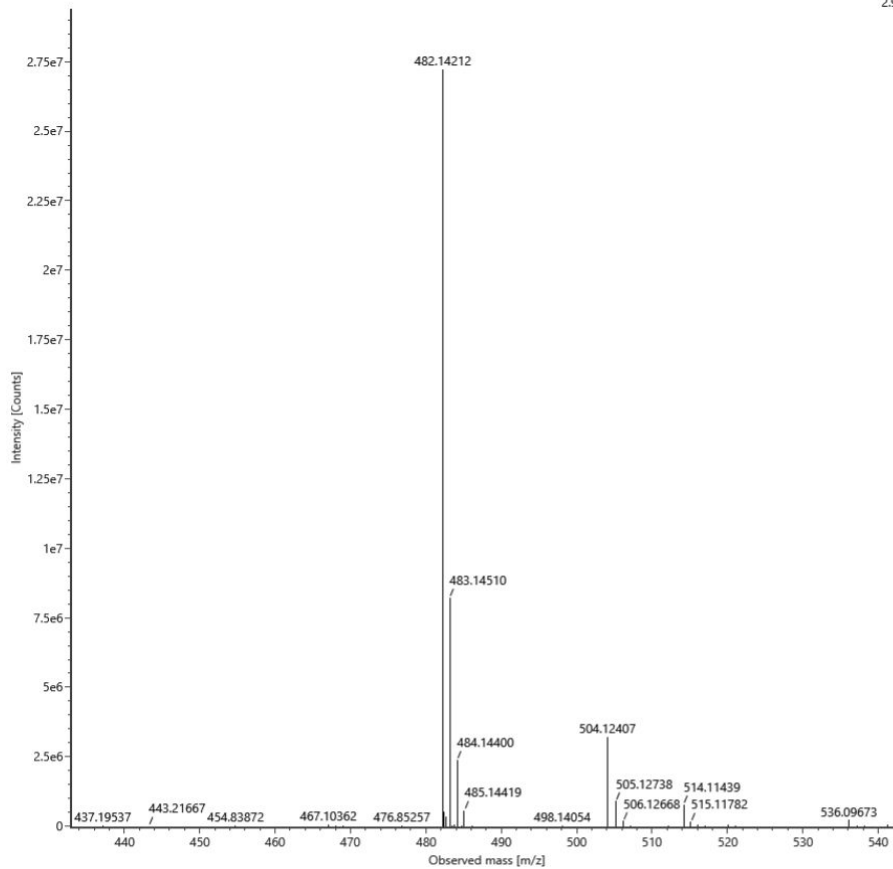

Figure S131 HRMS spectra of compound A29

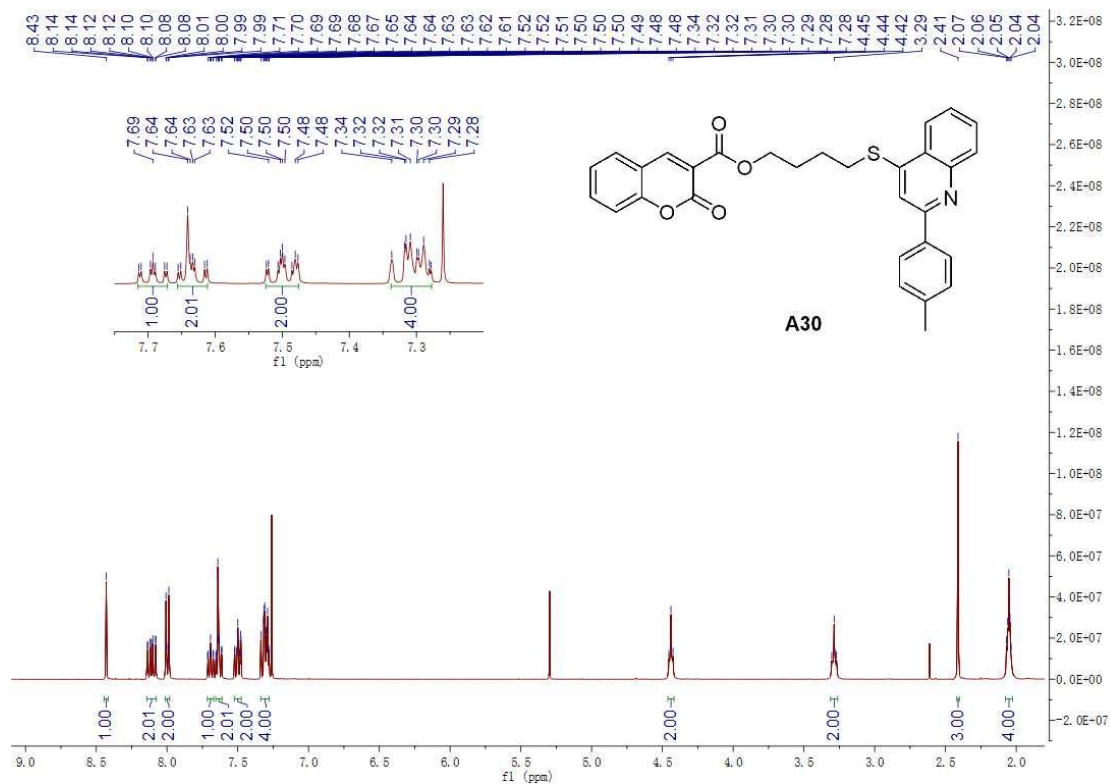

Figure S132 <sup>1</sup>H NMR spectra of compound A30

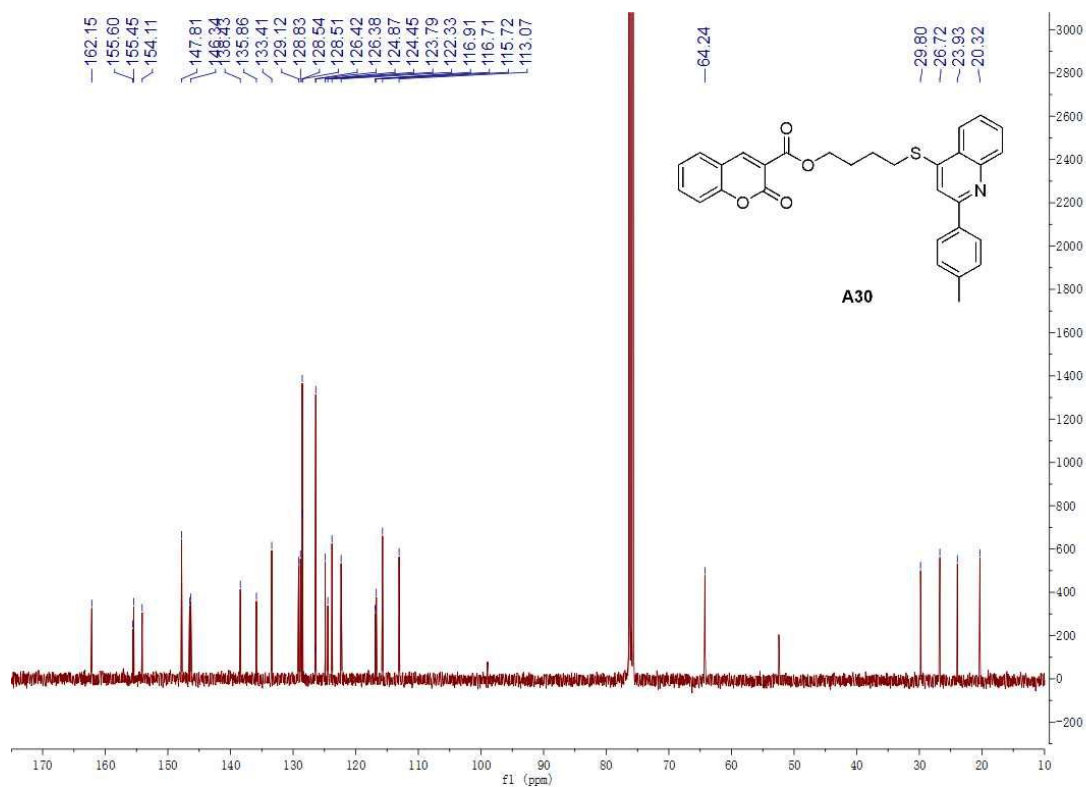

**Figure S133 <sup>13</sup>C NMR spectra of compound A30**

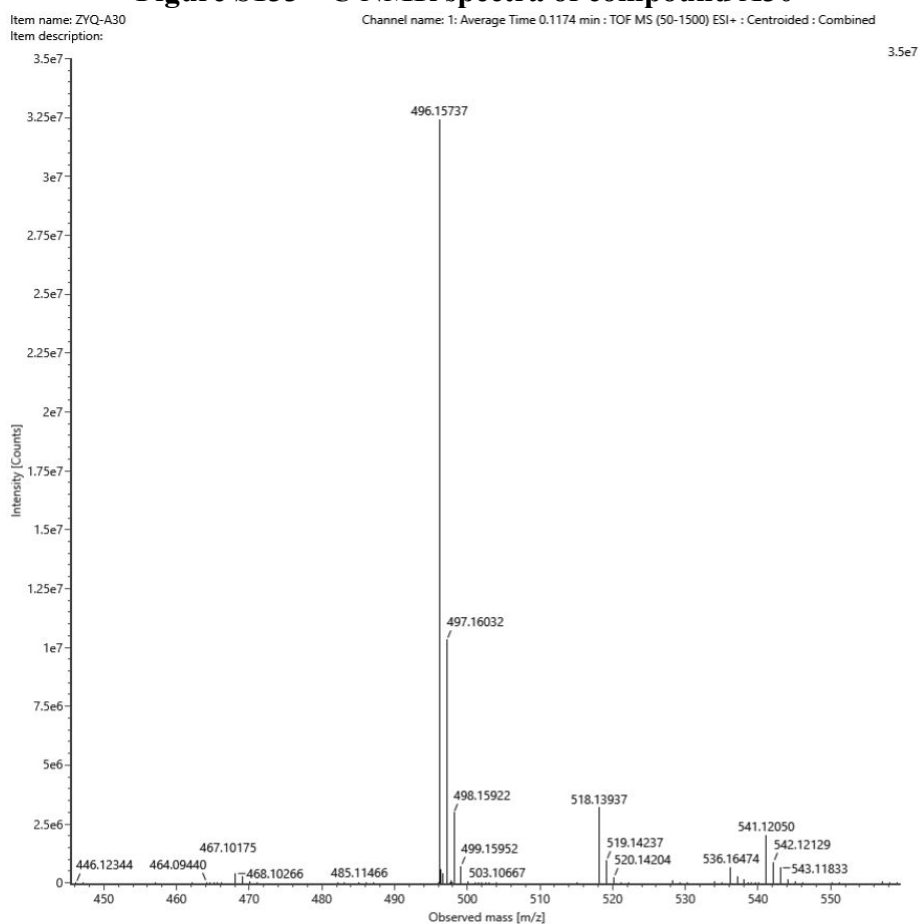

**Figure S134 HRMS spectra of compound A30**

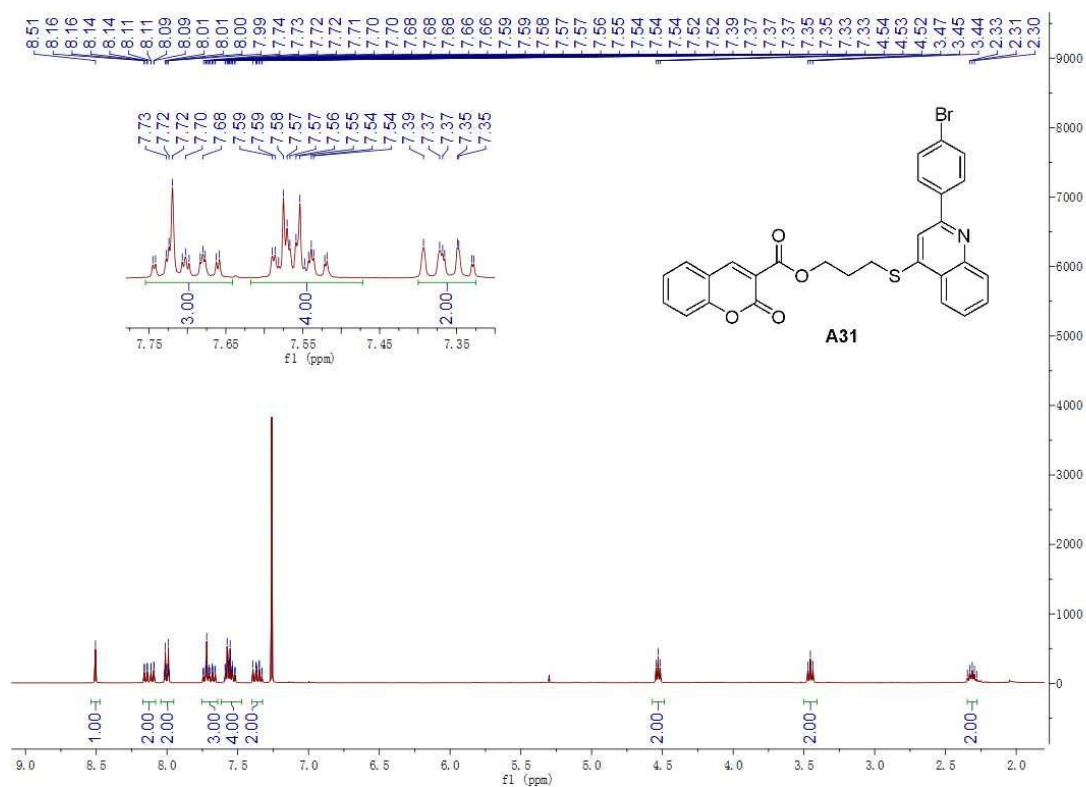

Figure S135 <sup>1</sup>H NMR spectra of compound A31

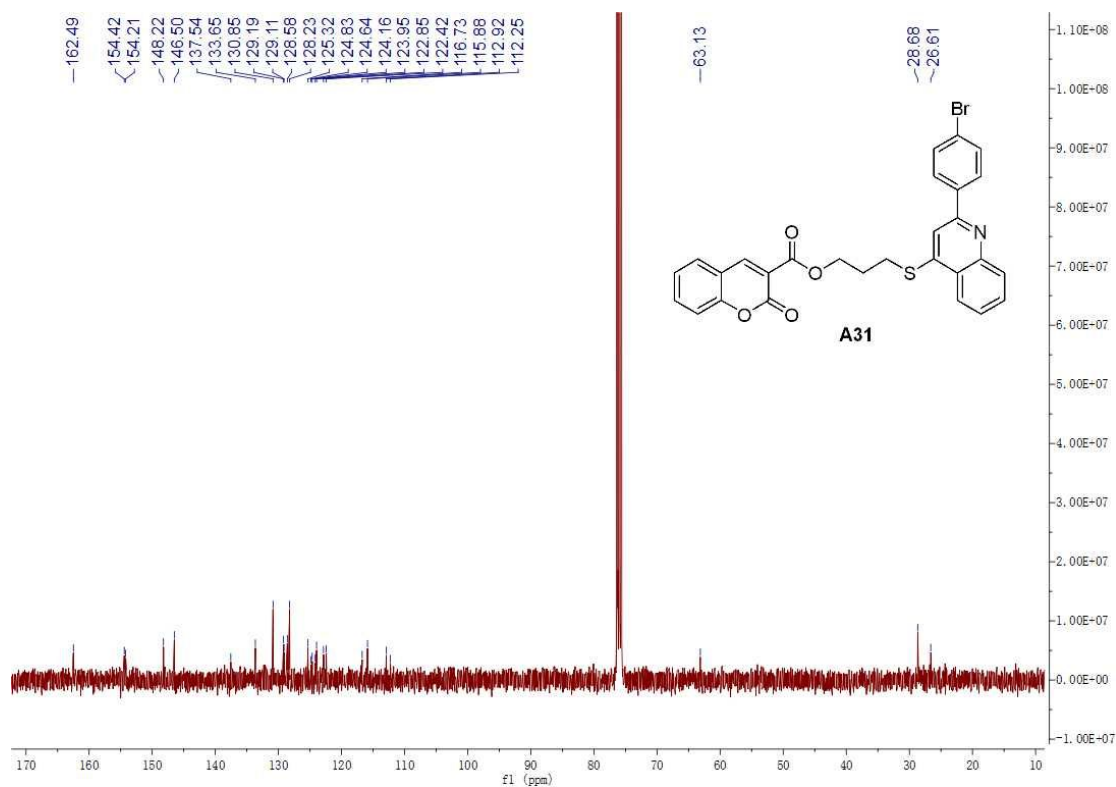

Figure S136 <sup>13</sup>C NMR spectra of compound A31

Item name: ZYQ-A31  
Item description:

Channel name: 1: Average Time 0.1174 min : TOF MS (50-1500) ESI+ : Centroided : Combined

3.49e6

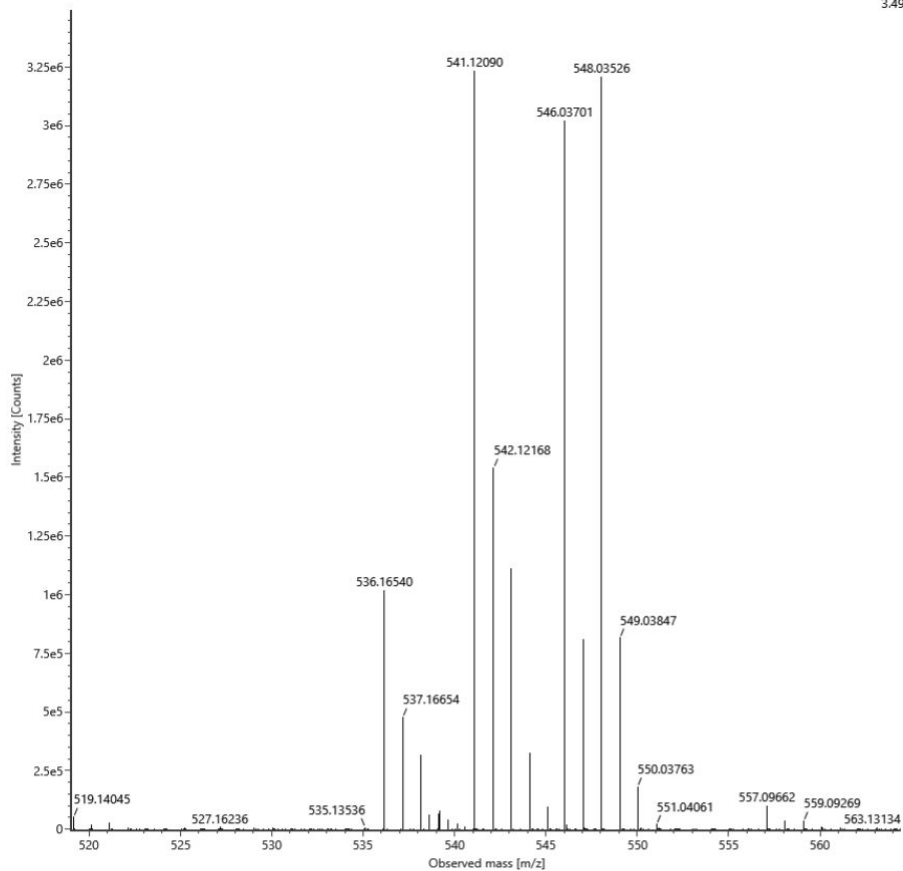

Figure S137 HRMS spectra of compound A31

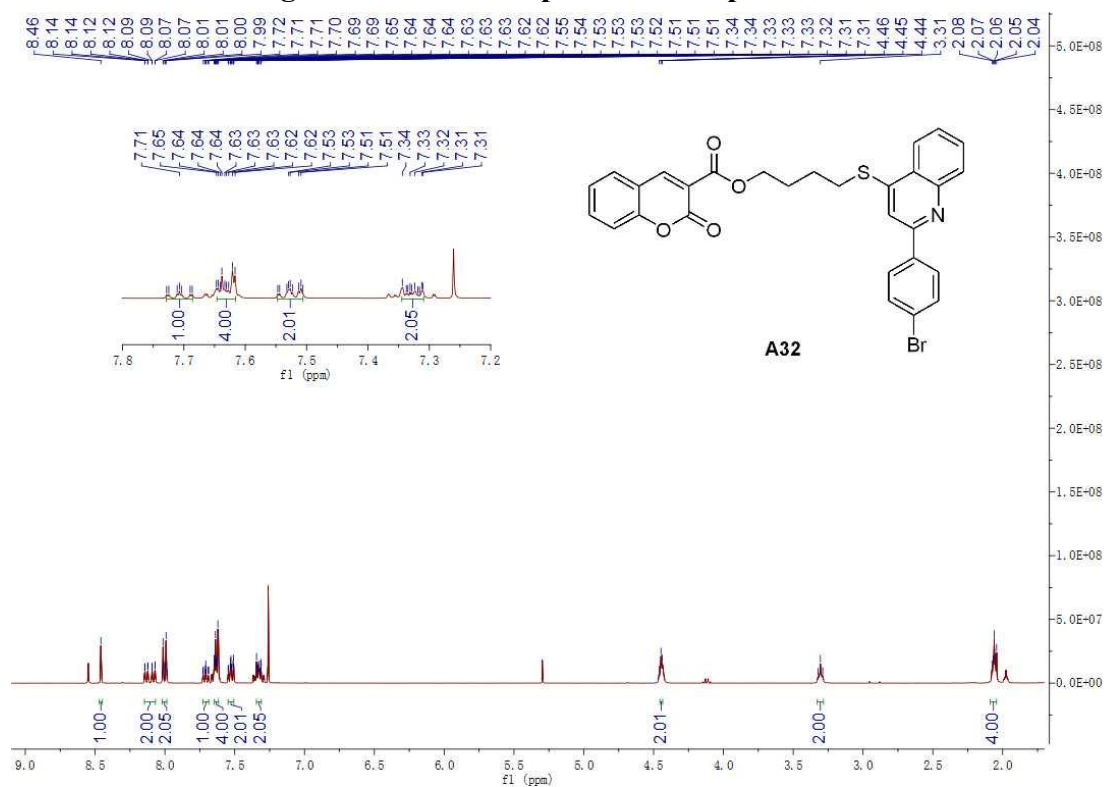

Figure S138 <sup>1</sup>H NMR spectra of compound A32

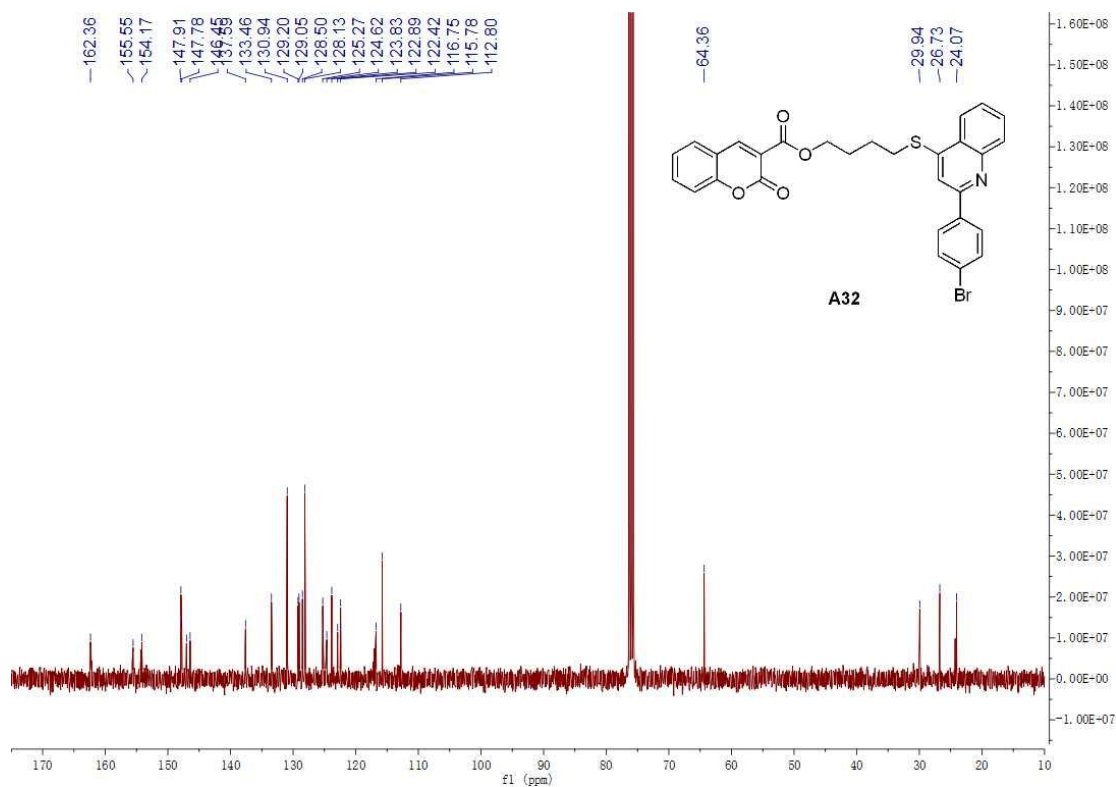

**Figure S139  $^{13}\text{C}$  NMR spectra of compound A32**

Item name: ZYQ-A32  
Item description:

Channel name: 1: Average Time 0.1291 min : TOF MS (50-1500) ESI+ : Centroided : Combined

2.12e6

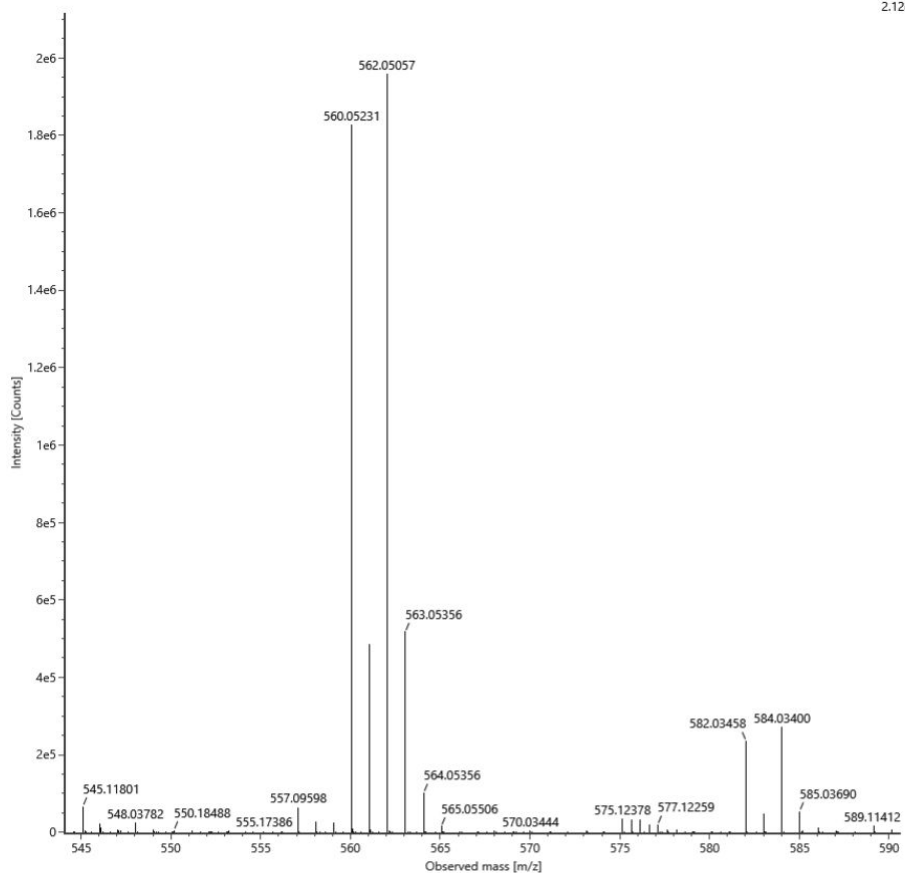

**Figure S140 HRMS spectra of compound A32**

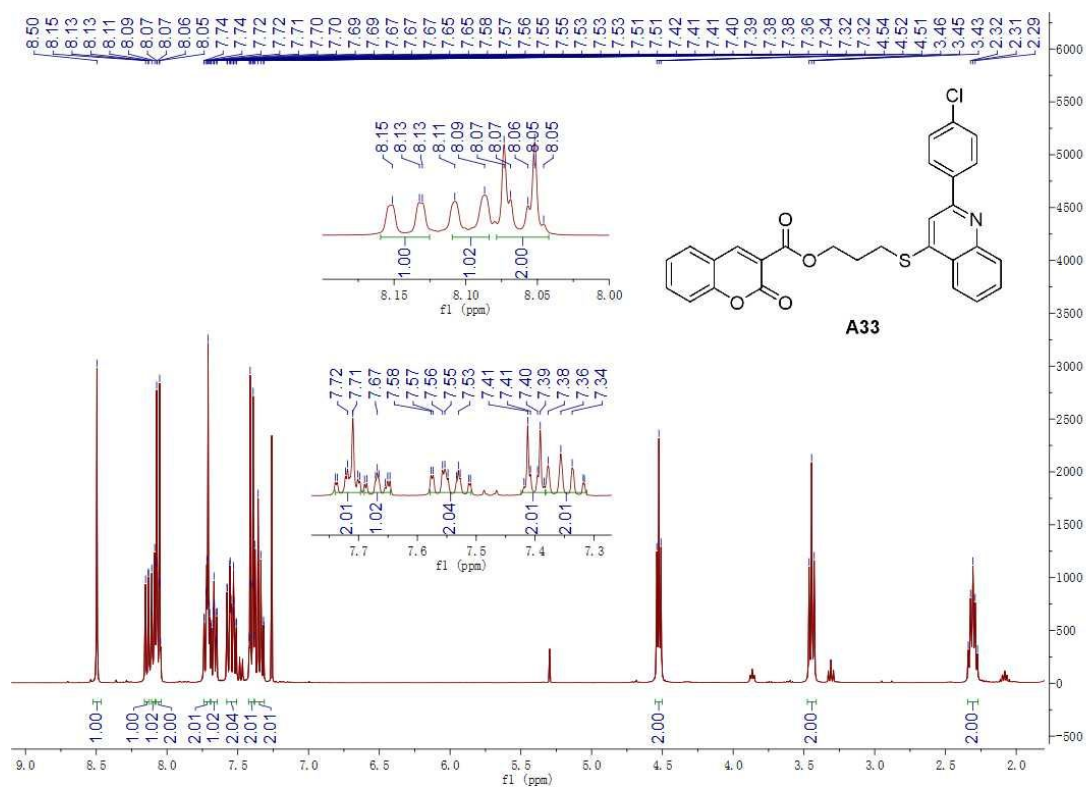

**Figure S141  $^1\text{H}$  NMR spectra of compound A33**

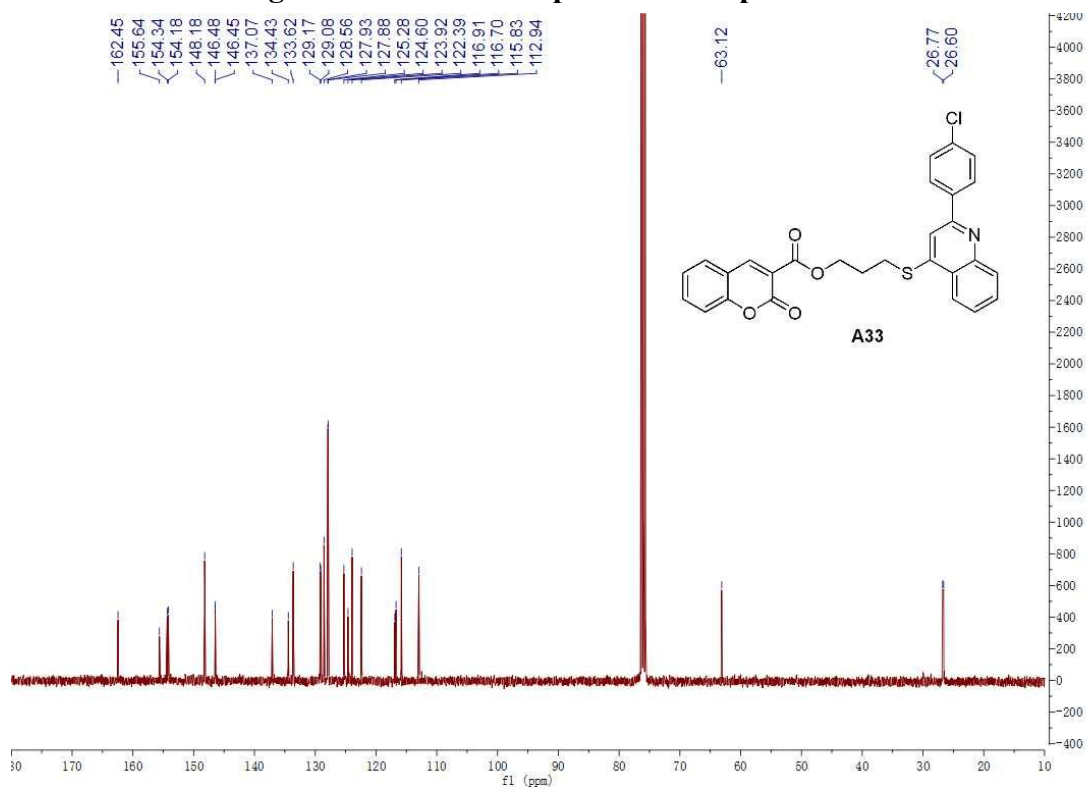

**Figure S142  $^{13}\text{C}$  NMR spectra of compound A33**



Item name: ZYQ-A33  
Item description:

Channel name: 1: Average Time 0.1291 min : TOF MS (50-1500) ESI+ : Centroided : Combined

1.07e7

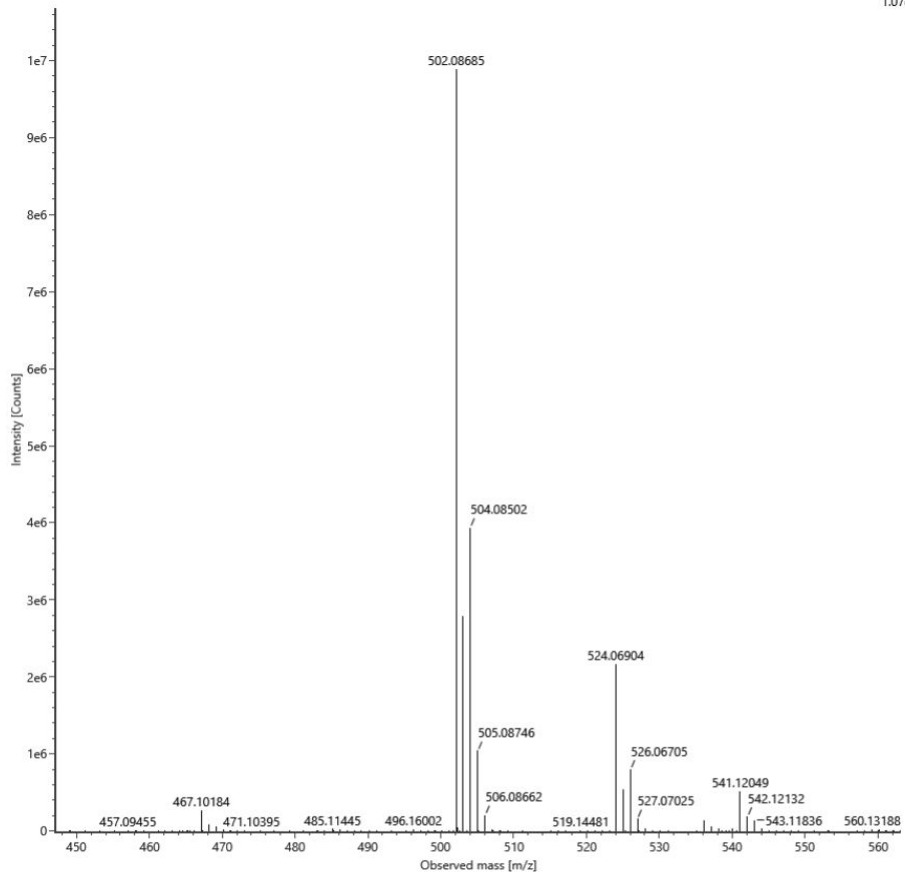

Figure S143 HRMS spectra of compound A33

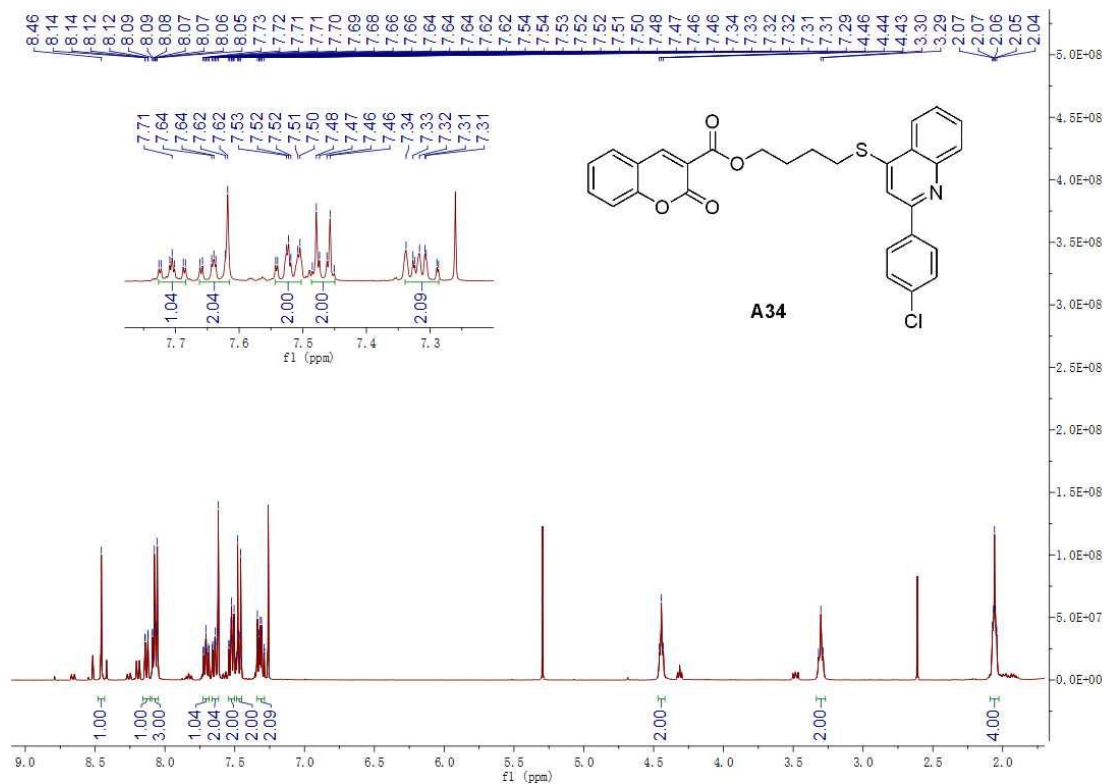

Figure S144 <sup>1</sup>H NMR spectra of compound A34

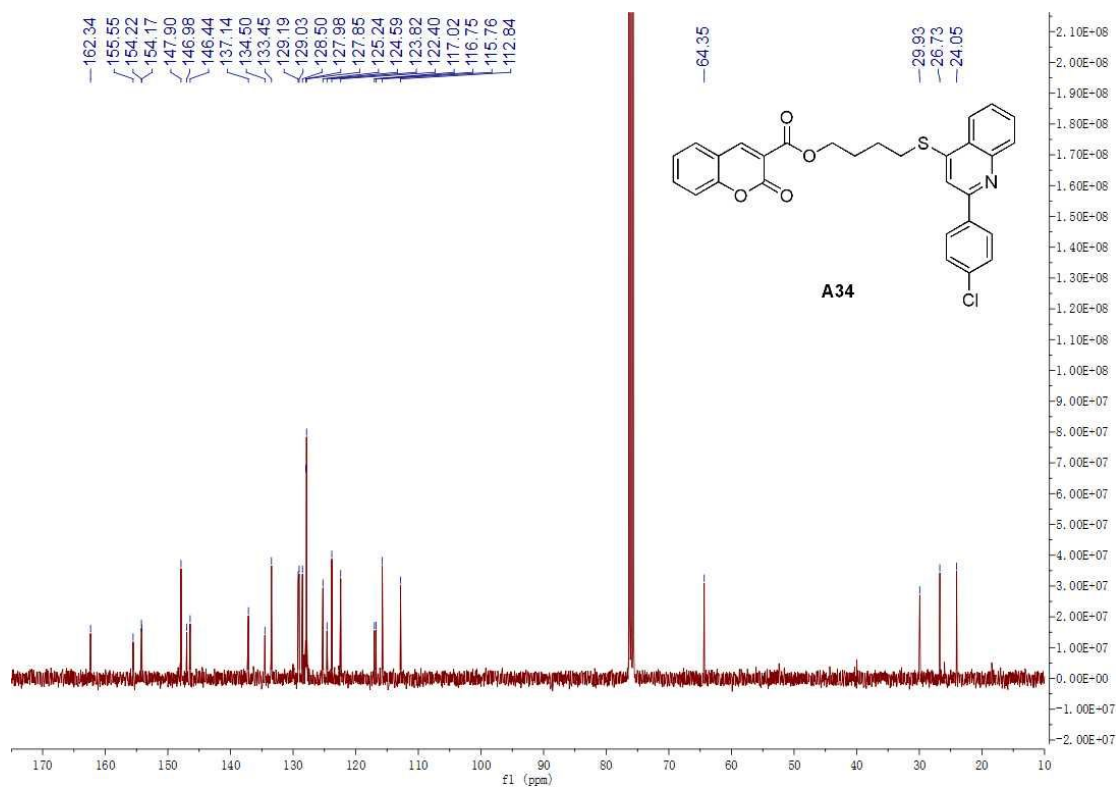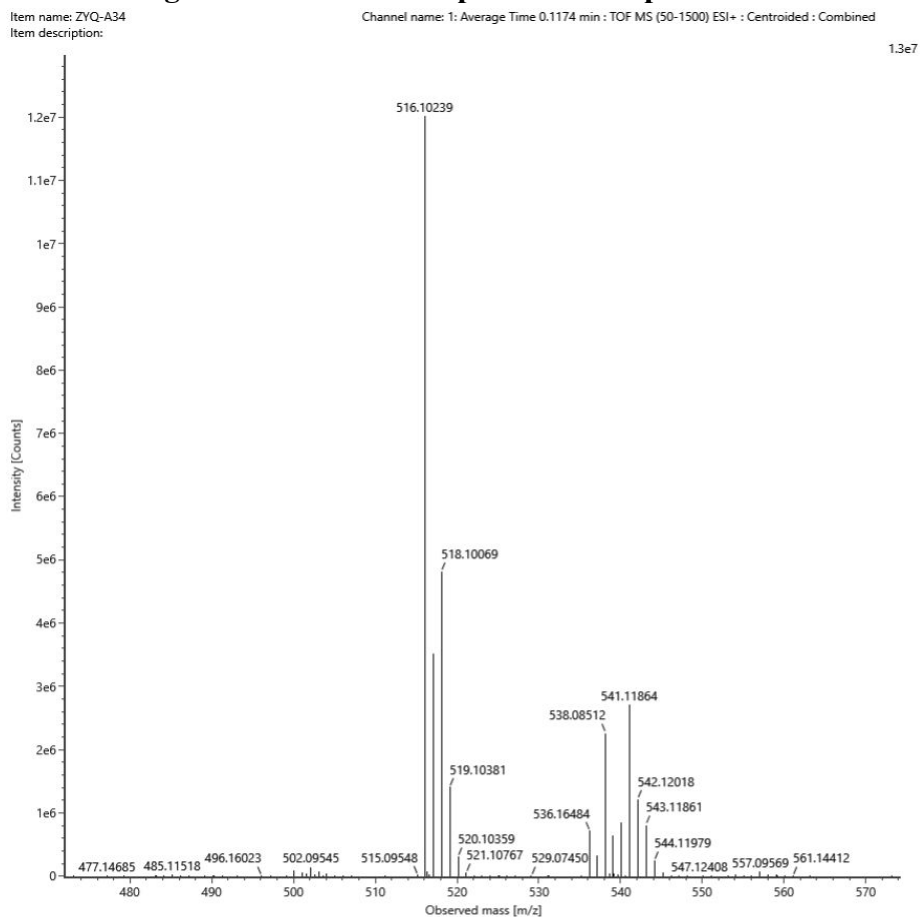

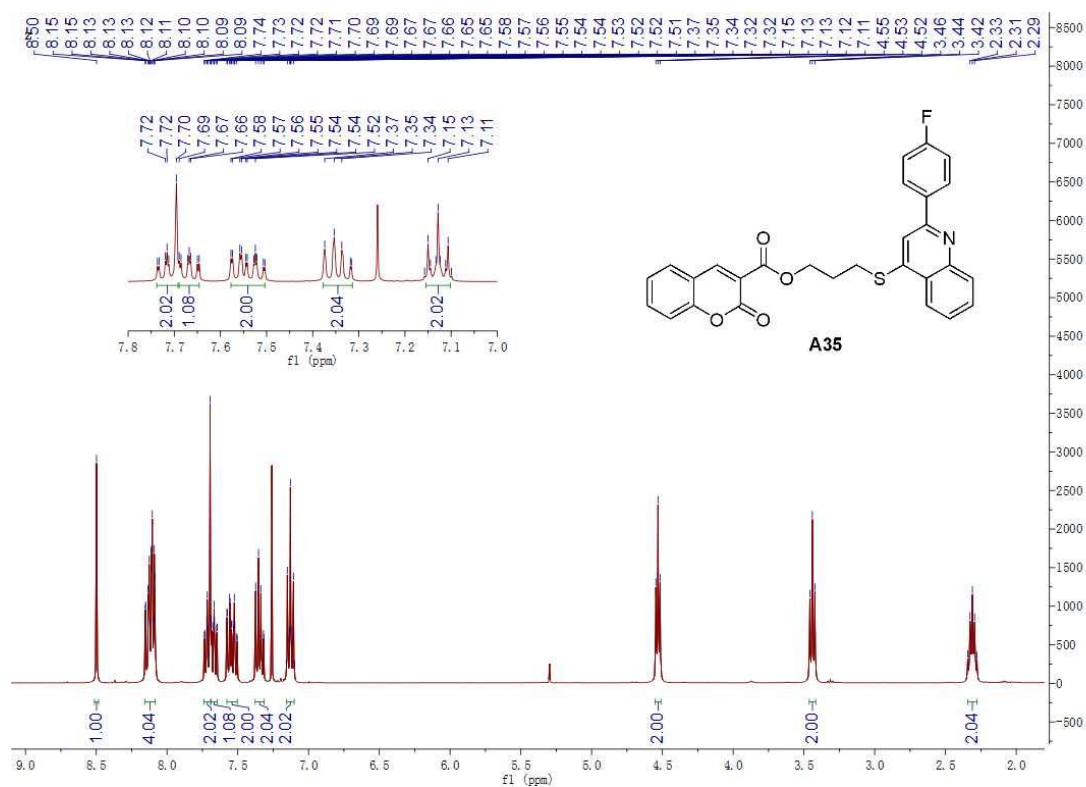

**Figure S147 <sup>1</sup>H NMR spectra of compound A35**

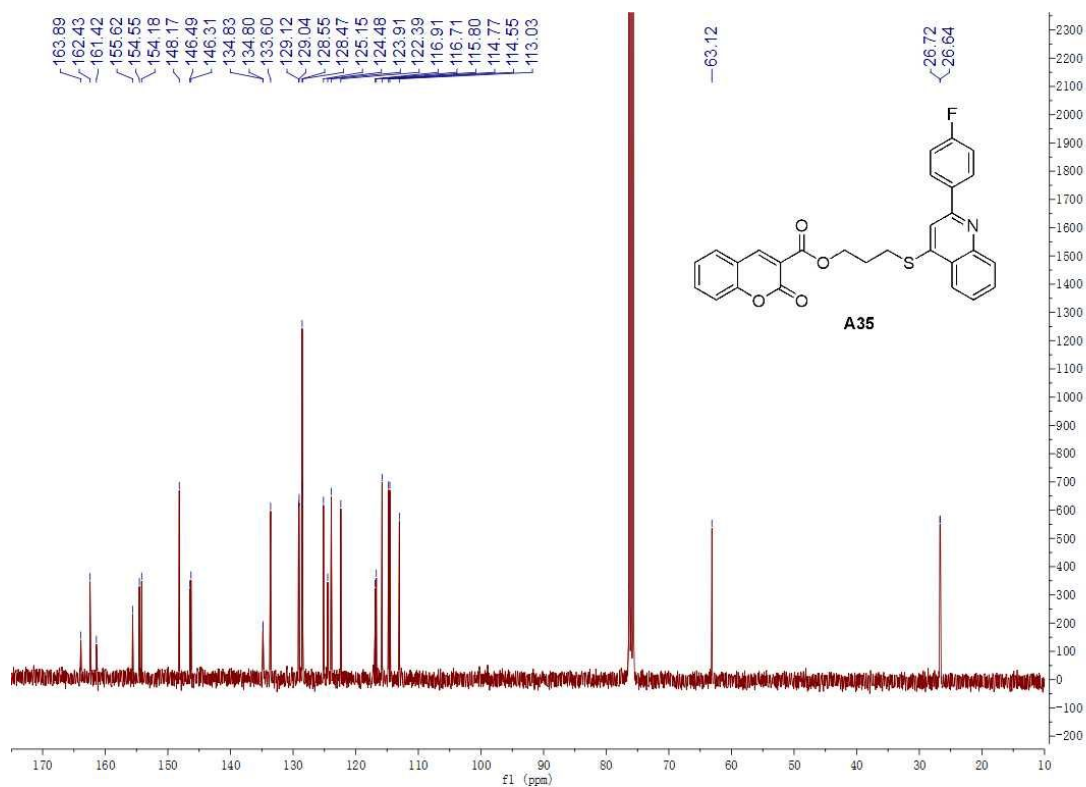

**Figure S148 <sup>13</sup>C NMR spectra of compound A35**

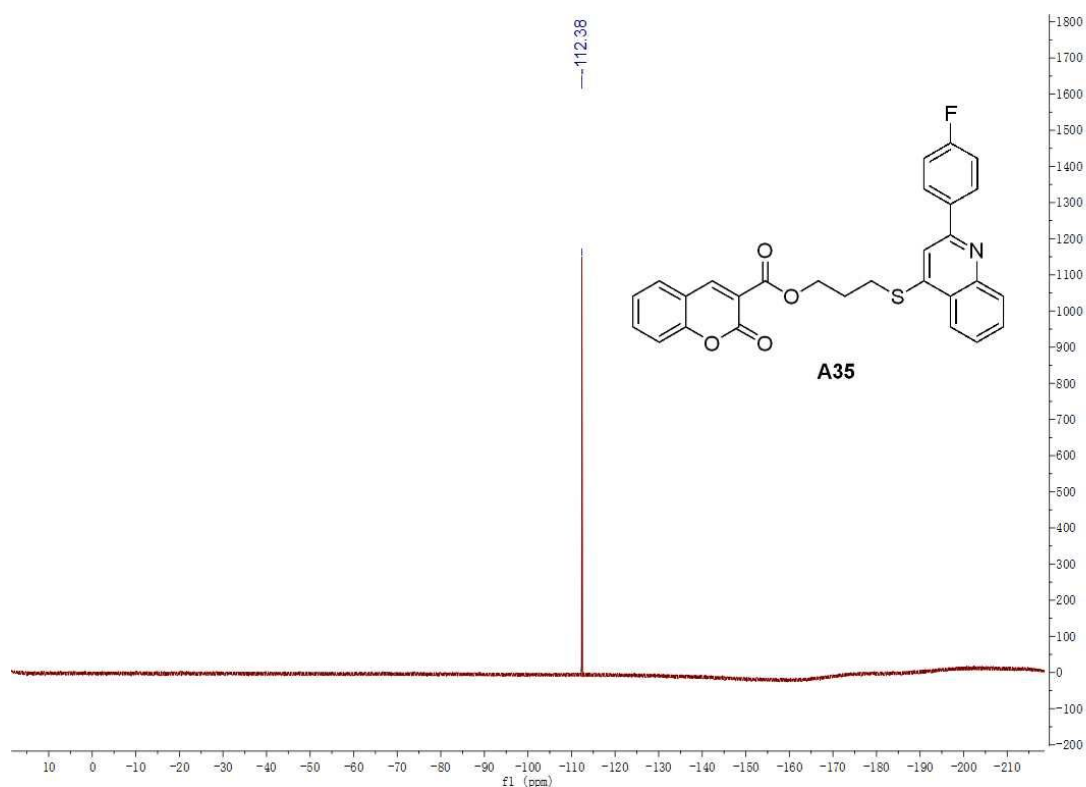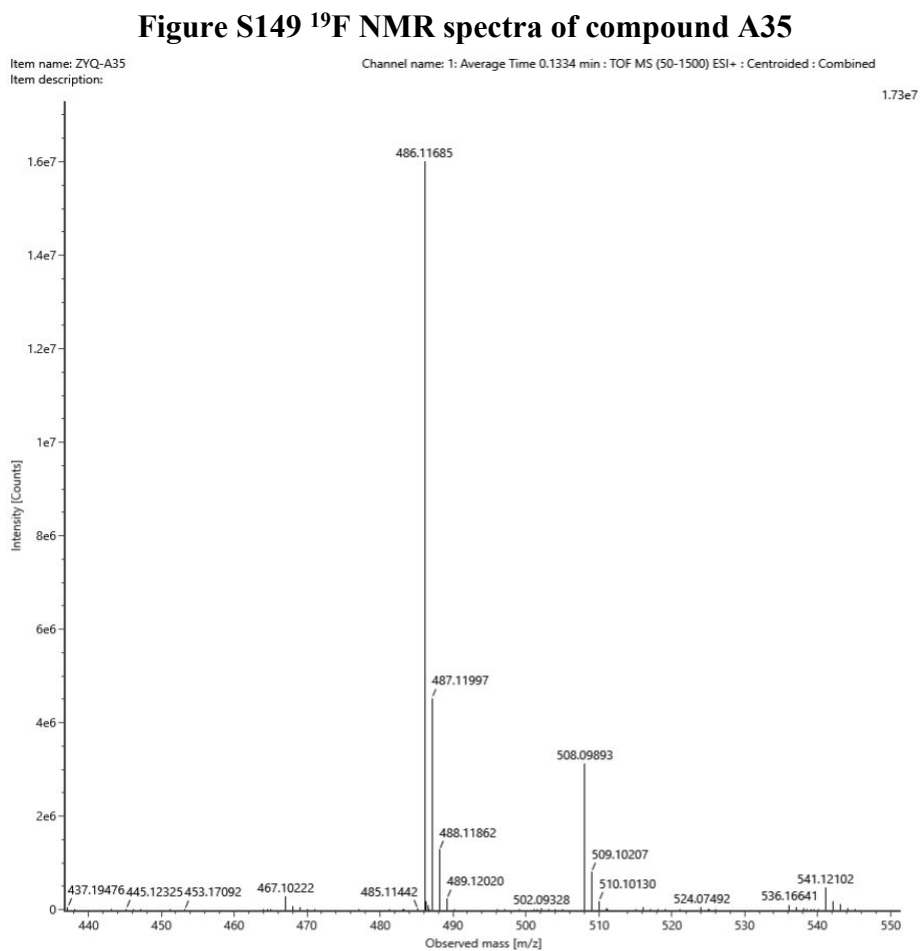

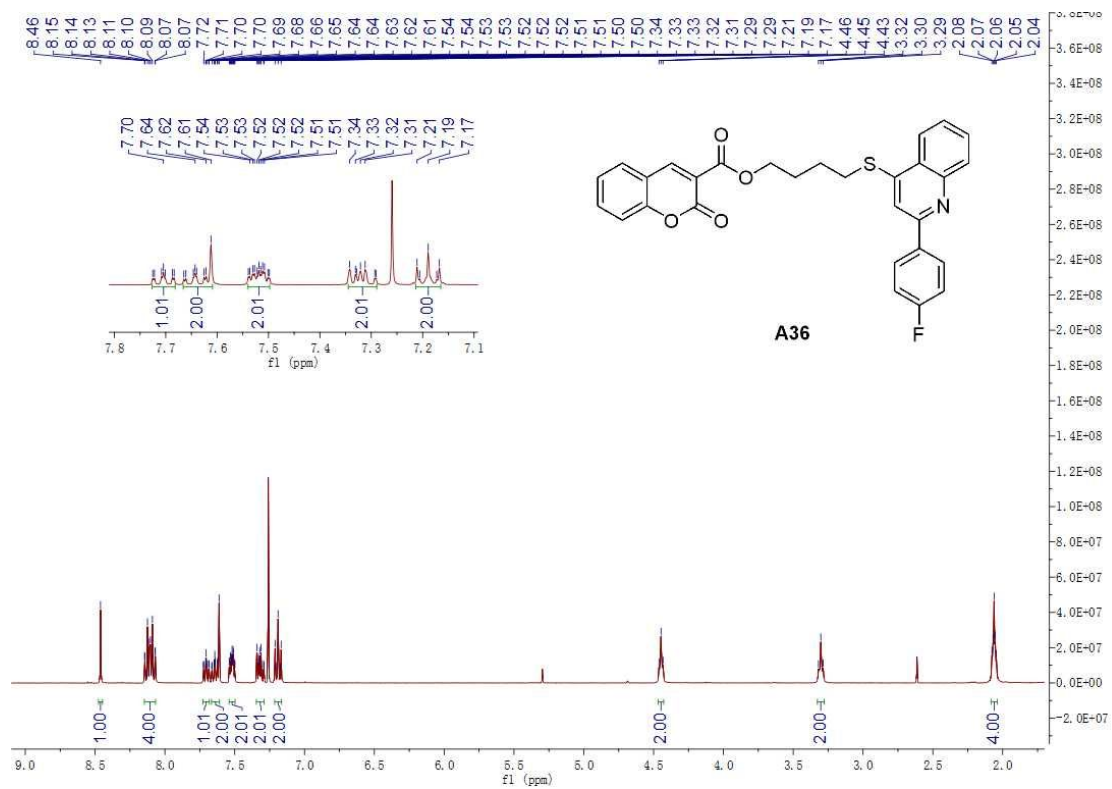

**Figure S151 <sup>1</sup>H NMR spectra of compound A36**

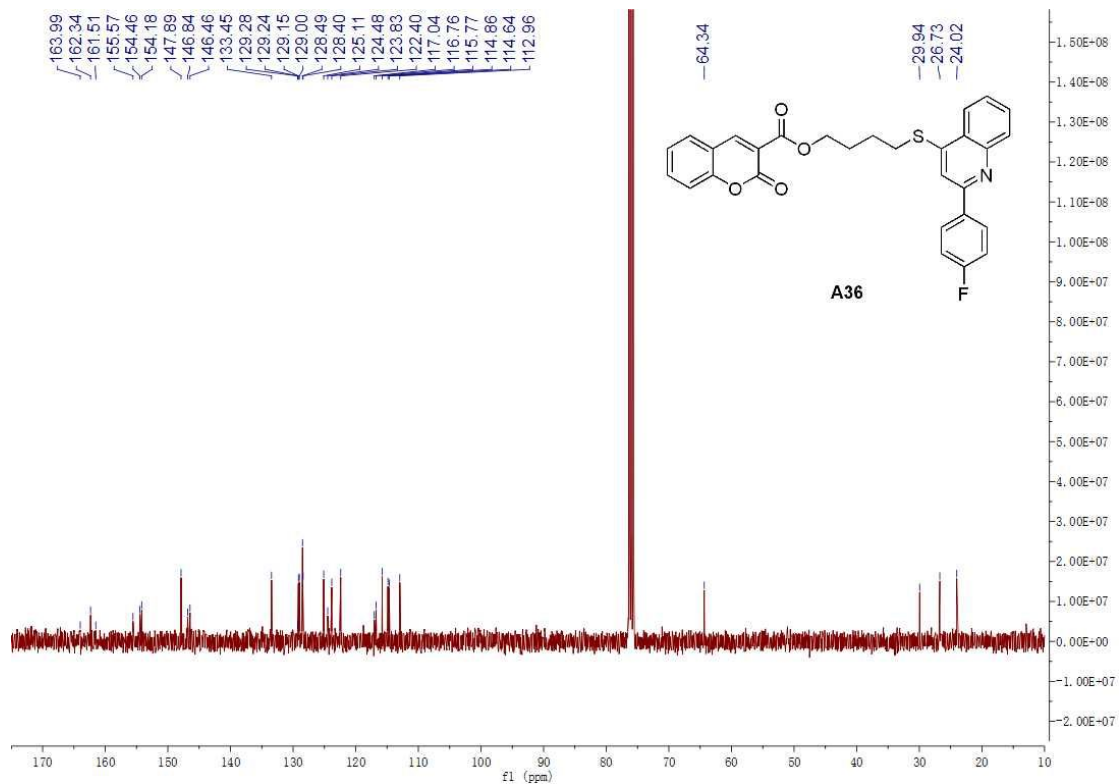

**Figure S152 <sup>13</sup>C NMR spectra of compound A36**

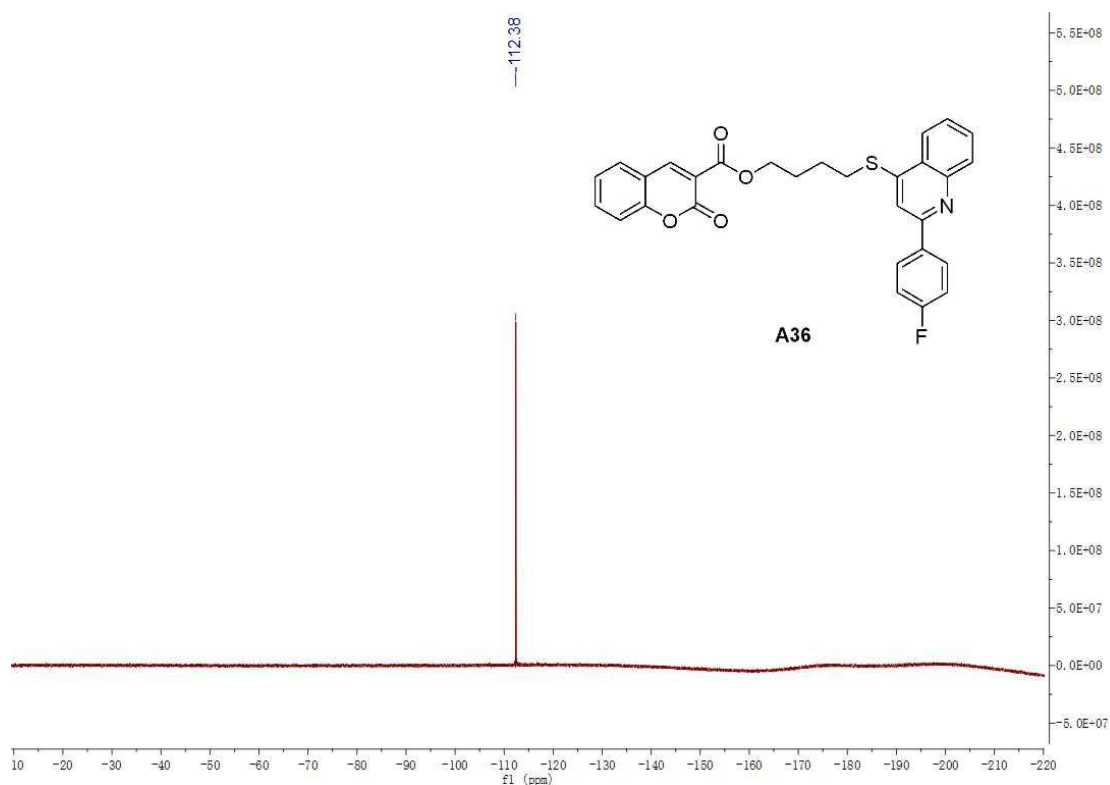

**Figure S153 <sup>19</sup>F NMR spectra of compound A36**

Item name: ZYQ-A36  
Item description:

Channel name: 1: Average Time 0.1217 min : TOF MS (50-1500) ESI+ : Centroided : Combined

6.98e6

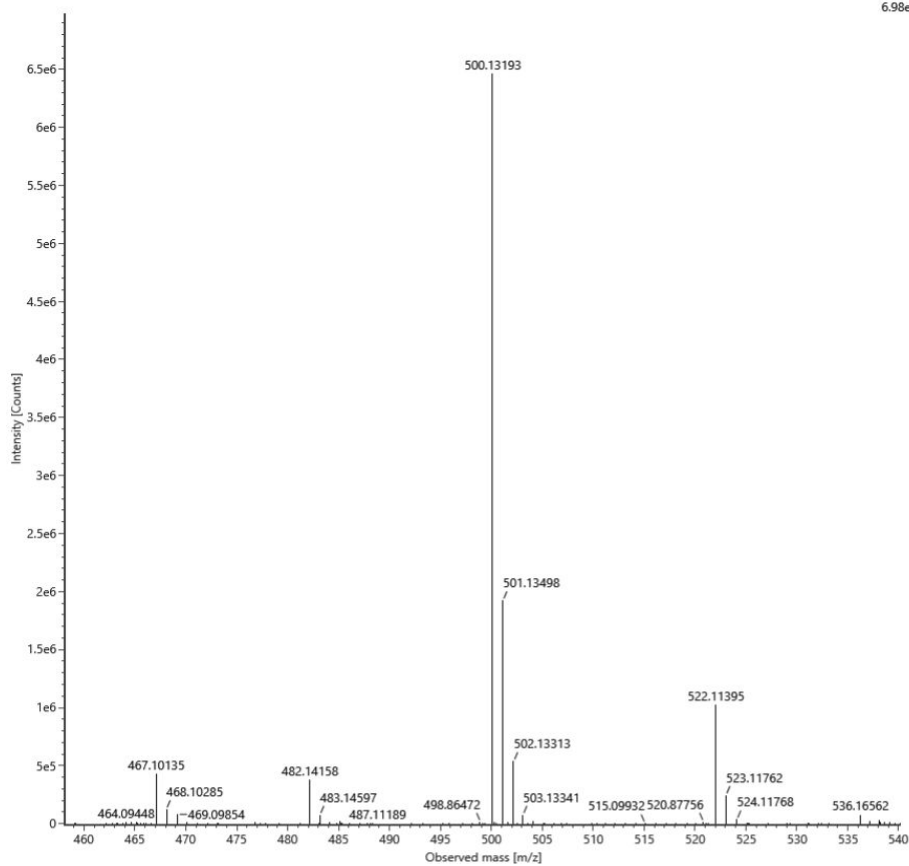

**Figure S154 HRMS spectra of compound A36**

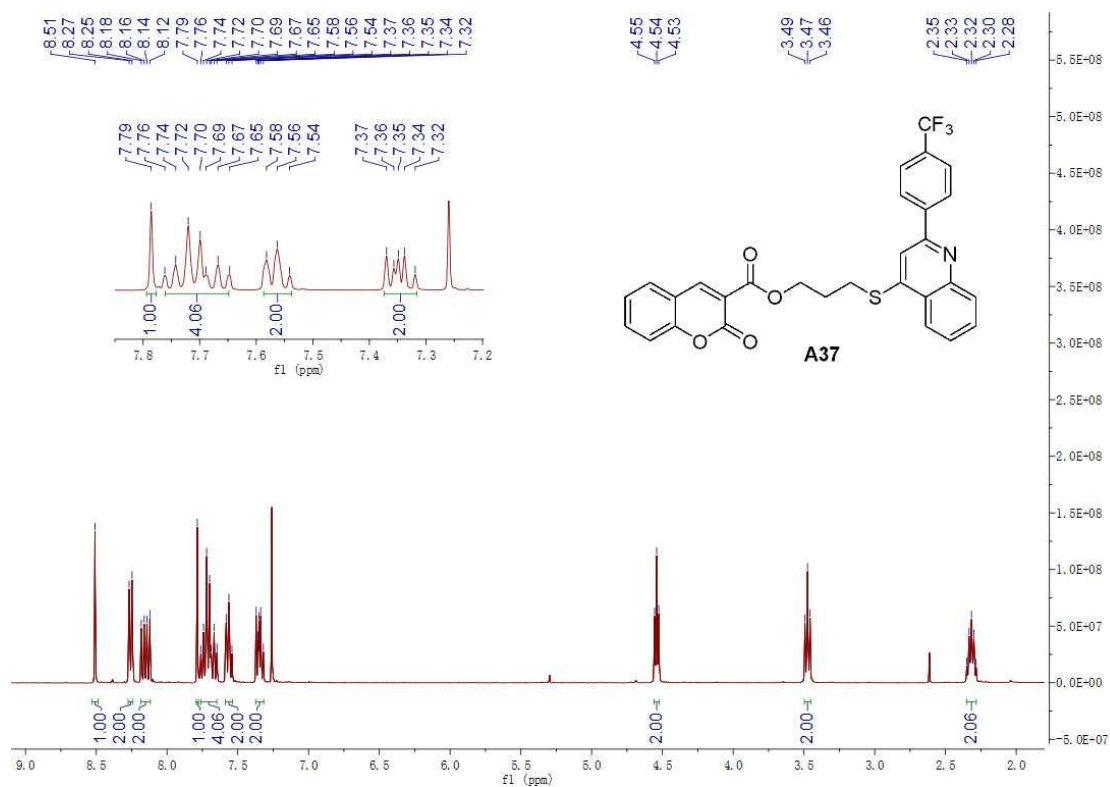

Figure S155  $^1\text{H}$  NMR spectra of compound A37

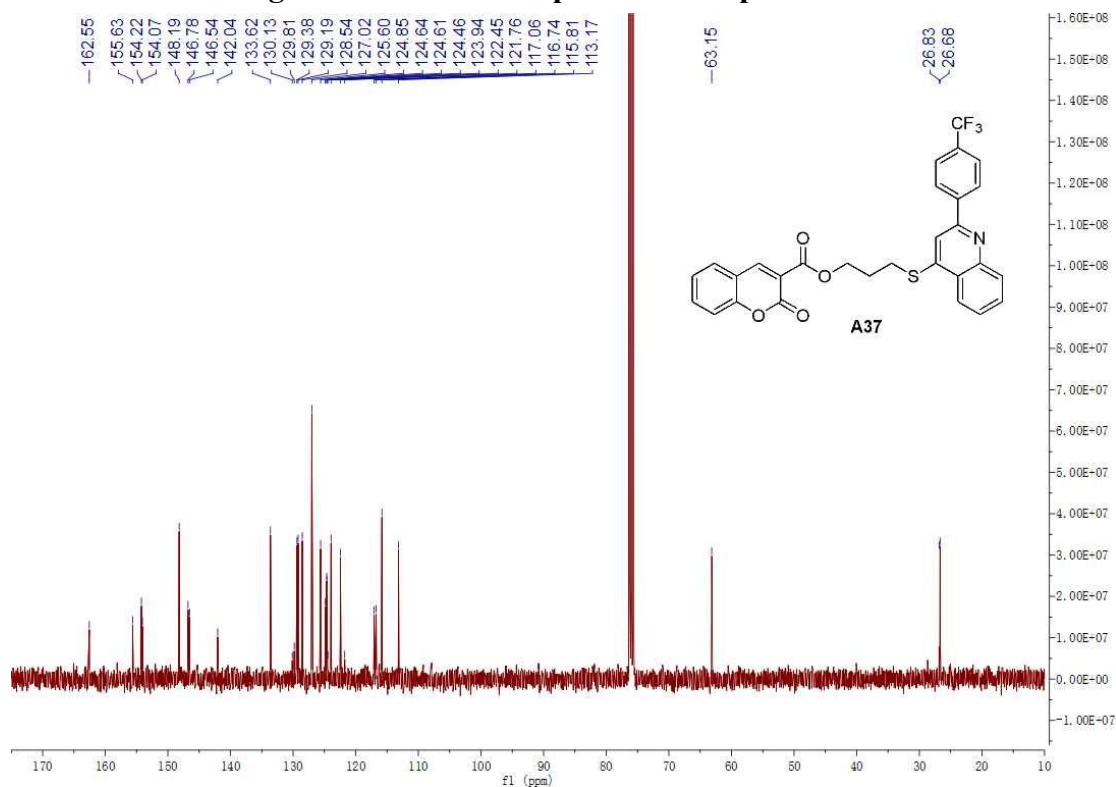

Figure S156  $^{13}\text{C}$  NMR spectra of compound A37

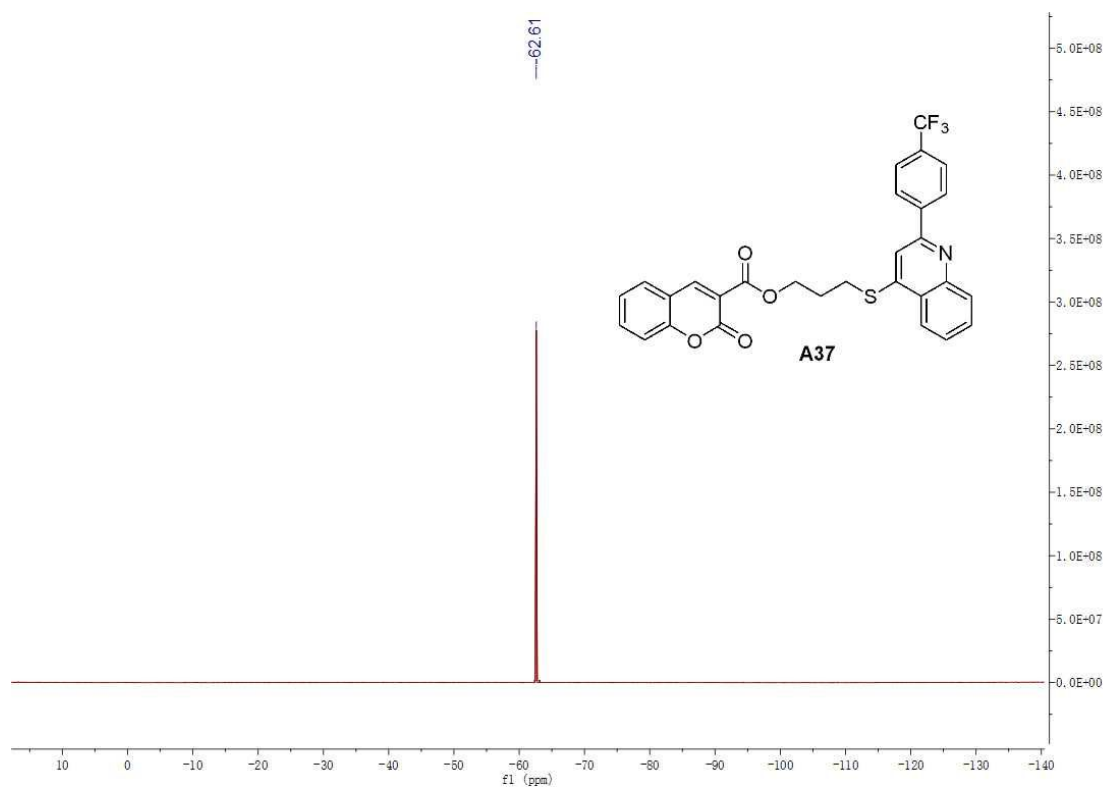

**Figure S157  $^{19}\text{F}$  NMR spectra of compound A37**

Item name: ZYQ-A37  
Item description:

Channel name: 1: Average Time 0.1334 min : TOF MS (50-1500) ESI+ : Centroided : Combined

6.87e6

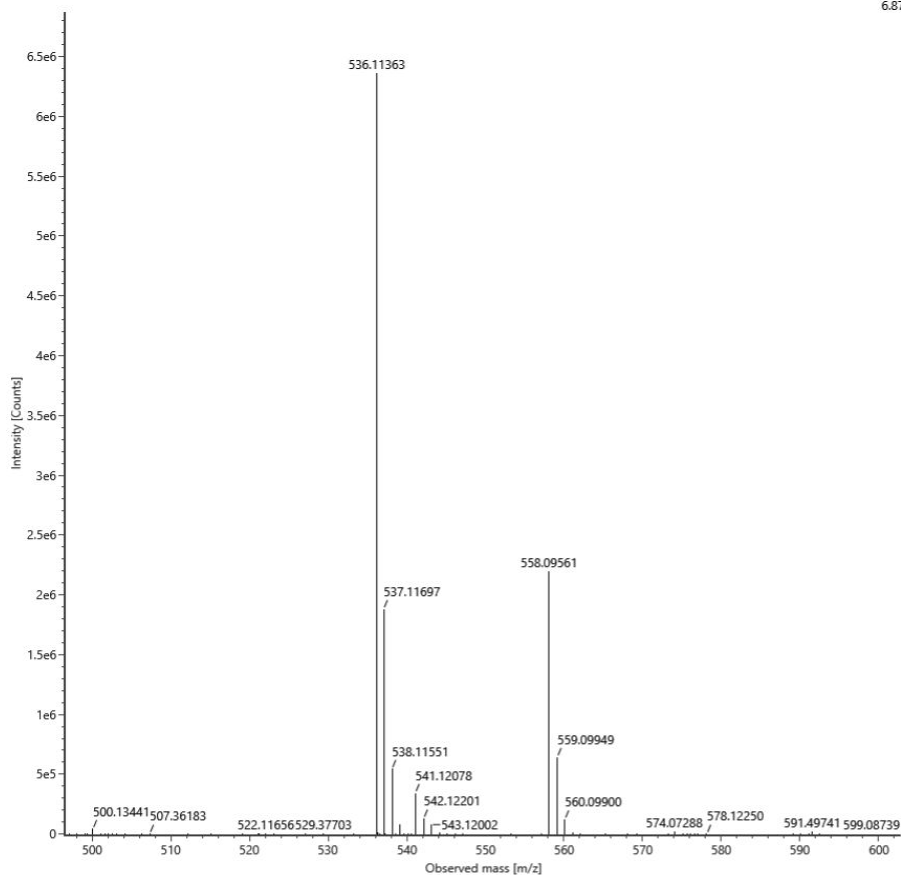

**Figure S158 HRMS spectra of compound A37**



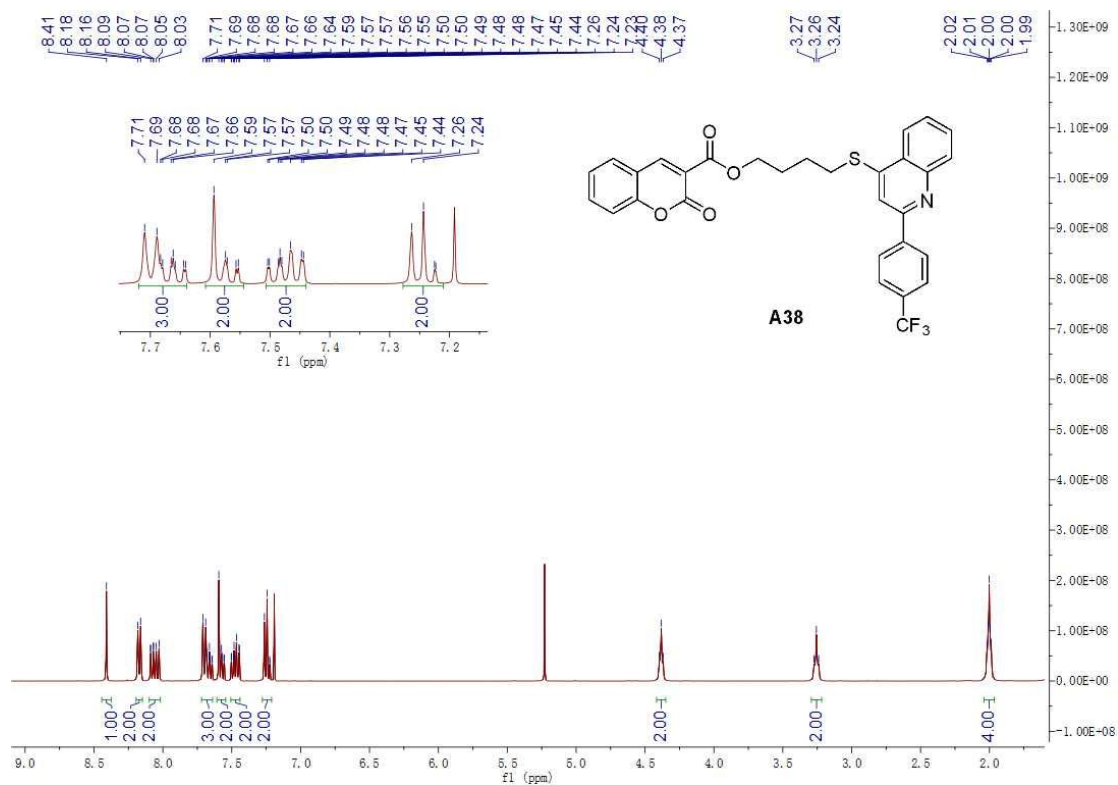

**Figure S159**  $^1\text{H}$  NMR spectra of compound **A38**

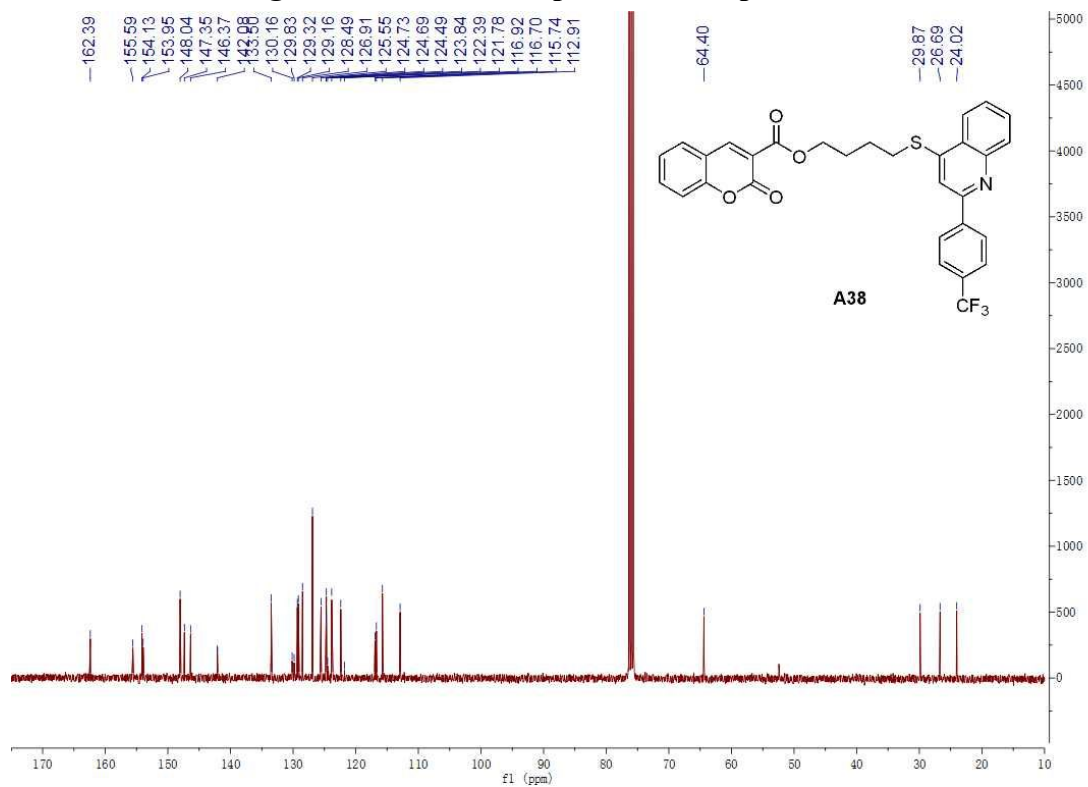

**Figure S160**  $^{13}\text{C}$  NMR spectra of compound **A38**

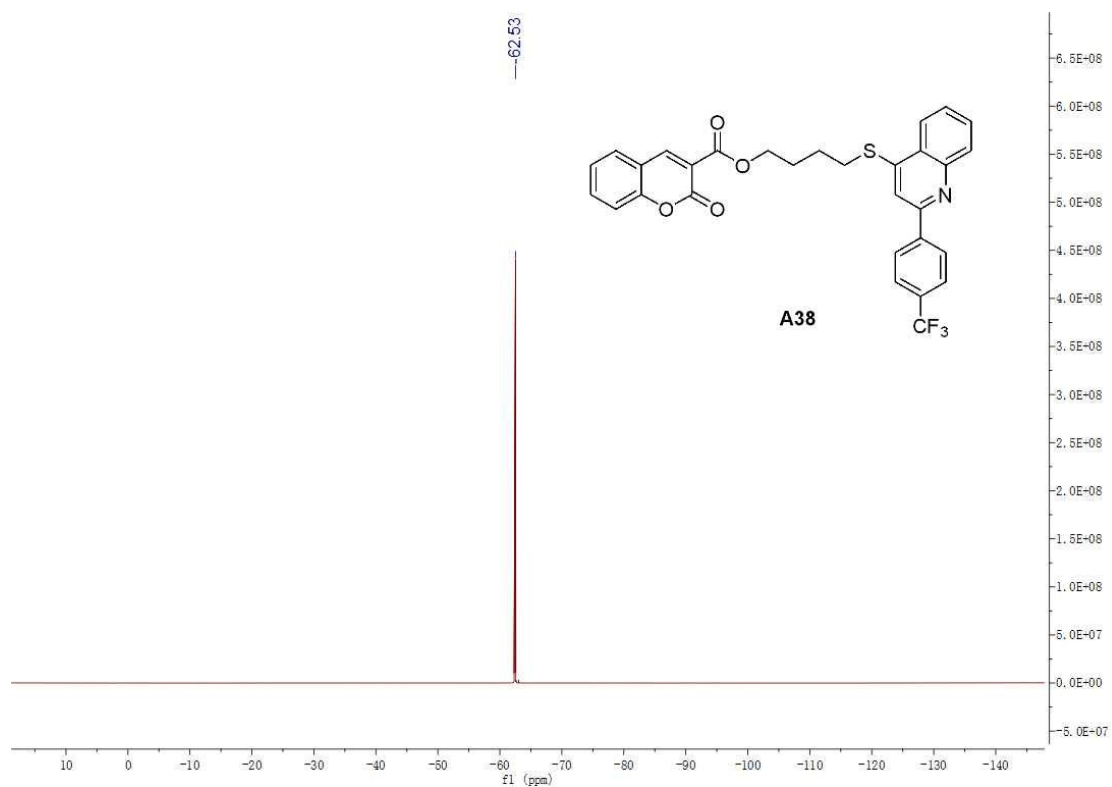

**Figure S161  $^{19}\text{F}$  NMR spectra of compound A38**

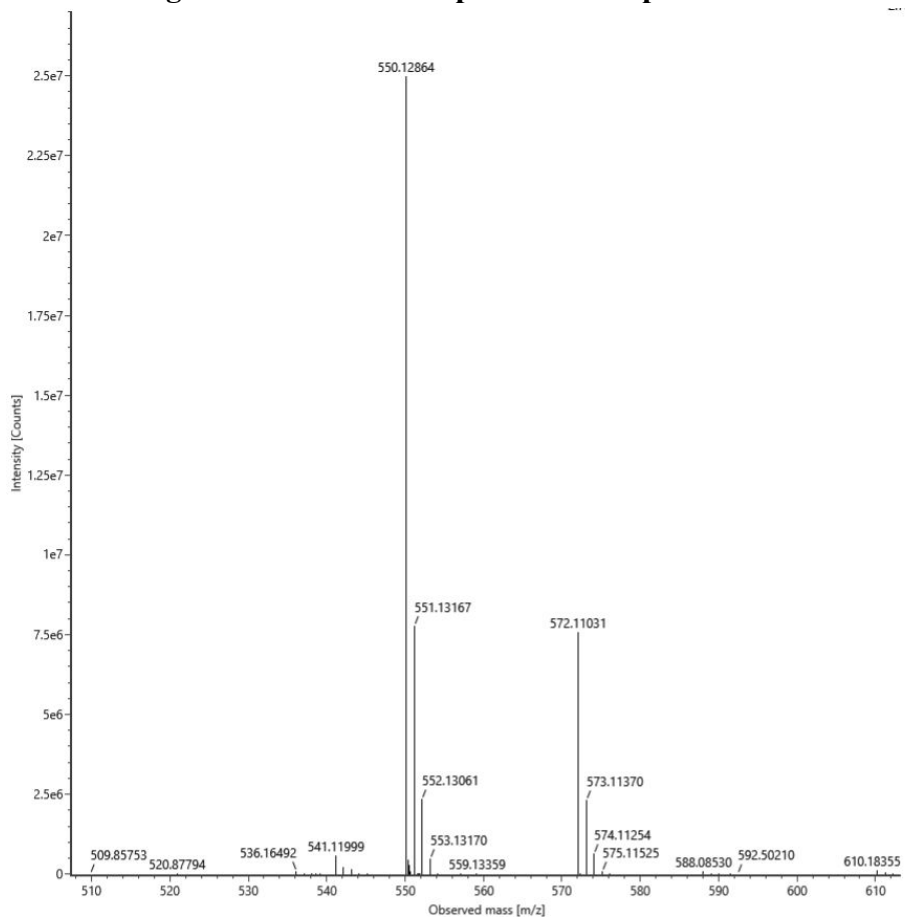

**Figure S162 HRMS spectra of compound A38**
